# Supplementary material for: Structural fine-tuning of zwitterionic salts for the discovery of LCST-type thermoresponsive materials
Source: Royal Society of Chemistry journal article supplement (doi:10.1039/d1qm01018b), 2021-01-01
Supplement: d1qm01018b1.pdf [file d1qm01018b1.pdf]

**Structural Fine-tuning of Zwitterionic Salts for the discovery of LCST-Type**

**Thermoresponsive Materials**

Yen-Ho Chu\* and Chien-Yuan Chen

Department of Chemistry and Biochemistry, National Chung Cheng University

Chiayi 62102, Taiwan, Republic of China

## Synthesis of ZIL 1a-1e and ZIL 2a-2e

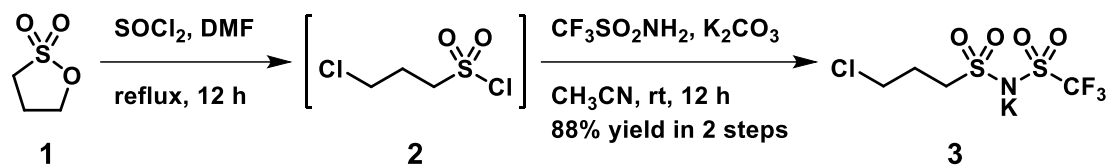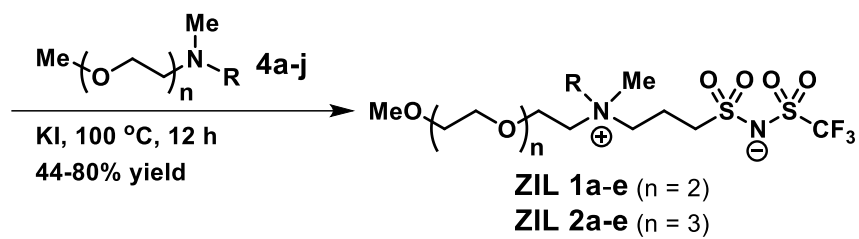

**Synthesis of  
potassium *N*-(3-chloropropylsulfonyl) trifluoromethanesulfonamide (3)**

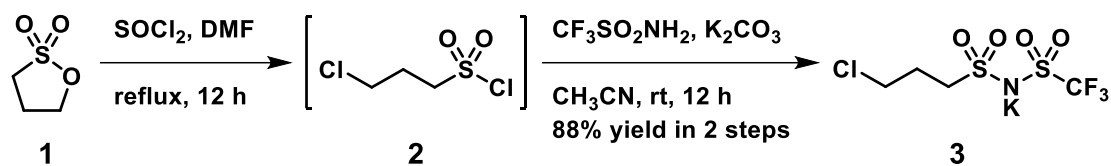

To a round-bottom flask containing 1,3-propanesultone **1** (1.0 g, 8.19 mmol) was added thionyl chloride (1.2 mL, 2 equiv) and DMF (0.063 mL, 0.1 equiv). The mixture was refluxed over 12 h. The excessive thionyl chloride was readily removed *in vacuo* to obtain sulfonyl chloride product as a pale yellow liquid **2**.

The sulfonyl chloride product **2** obtained was dissolved in acetonitrile (5 mL) and added dropwise to the stirring solution containing trifluoromethanesulfonamide (1.2 g, 1 equiv) and  $\text{K}_2\text{CO}_3$  (1.69 g, 1.5 equiv) dissolved in acetonitrile (35 mL) at room temperature. After 12 h, the solid salt was filtered off. The filtrate was concentrated under reduced pressure to obtain yellow solid crude product. Then, this crude product was continuously washed using a solvent mixture of ethyl acetate and dichloromethane (1/2, v/v) to finally afford the desired product **3** as white solid (1.95 g, 88% yield).

white solid, mp 177 °C;  $^1\text{H}$  NMR (400 MHz,  $\text{DMSO}-d_6$ )  $\delta$  2.05-2.16 (m,  $\text{ClCH}_2\text{CH}_2$ , 2H), 3.09 (t,  $J = 6.6$  Hz,  $\text{CH}_2\text{CH}_2\text{S}$ , 2H), 3.74 (t,  $J = 7.6$  Hz,  $\text{ClCH}_2\text{CH}_2$ , 2H);  $^{19}\text{F}$  NMR (376 MHz,  $\text{DMSO}-d_6$ )  $\delta$  -76.60 ( $\text{CF}_3$ , 3F).

**Synthesis of  
potassium *N*-(3-chloropropylsulfonyl) pentafluoroethylsulfonamide**

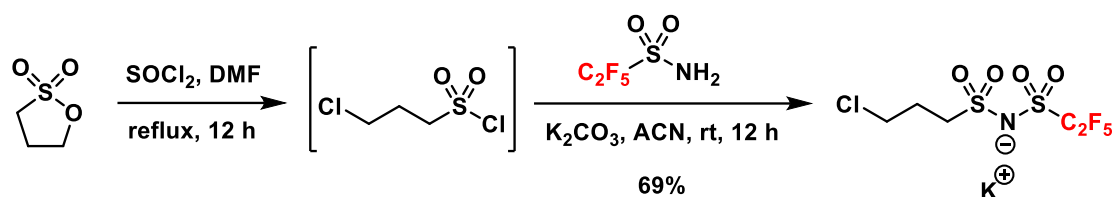

To a round-bottom containing 1,3-propanesultone **1** (1.0 g, 8.19 mmol) was added thionyl chloride (1.2 mL, 2 equiv) and DMF (0.063 mL, 0.1 equiv). The mixture was refluxed over 12 h. The excess thionyl chloride was removed *in vacuo* to obtain sulfonyl chloride product as a pale yellow liquid **2**.

The sulfonyl chloride product **2** obtained was dissolved in acetonitrile (5 mL) and added dropwise to the stirring solution containing pentafluoroethanesulfonamide (1.63 g, 1 equiv) and K<sub>2</sub>CO<sub>3</sub> (1.69 g, 1.5 equiv) dissolved in acetonitrile (35 mL) at room temperature. After 12 h, the solid salt was filtered off. The filtrate was concentrated under reduced pressure to obtain yellow oil crude product. Then, the crude product was continuously washed using dichloromethane to eventually afford the desired product as white solid (2.12 g, 69% yield).

white solid, mp 175 °C; <sup>1</sup>H NMR (400 MHz, DMSO-*d*<sub>6</sub>) δ 2.06-2.16 (m, ClCH<sub>2</sub>CH<sub>2</sub>, 2H), 3.09 (t, *J* = 7.2 Hz, CH<sub>2</sub>CH<sub>2</sub>S, 2H), 3.75 (t, *J* = 6.8 Hz, ClCH<sub>2</sub>CH<sub>2</sub>, 2H); <sup>19</sup>F NMR (376 MHz, DMSO-*d*<sub>6</sub>) δ -76.60 (CF<sub>2</sub>CF<sub>3</sub>, 3F), -115.75 (CF<sub>2</sub>CF<sub>3</sub>, 2F).

## Synthesis of ZIL 1a-1e and ZIL 2a-2e

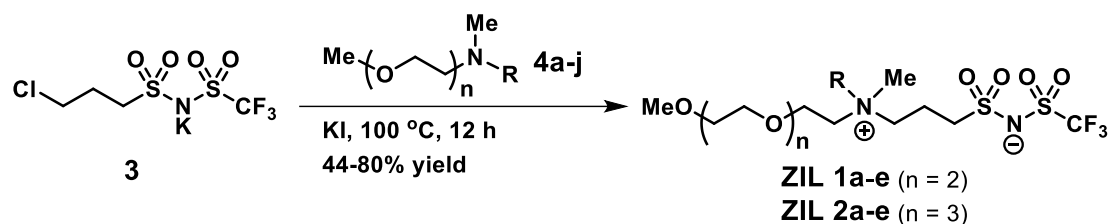

To a reaction vial containing potassium *N*-(3-chloropropylsulfonyl) trifluoromethylsulfonamide **3** (100 mg, 0.305 mmol) and potassium iodide (5 mg, 0.1 equiv) was added tertiary amine (2 equiv), which could be readily prepared from reaction of commercial secondary amine with corresponding mesylate of triethylene or tetraethylene glycol monomethyl ether.<sup>1-3</sup> The mixture was heated at 100 °C for 12 h. After completion of the reaction, acetonitrile solvent was added to the reaction vial to precipitate potassium chloride produced. The solid salt was filtered off, and its filtrate was concentrated under reduced pressure to obtain yellow liquid crude ZIL product. With the aid of sonication, excessive amine in crude product could be washed away by ether. This crude product was then dissolved in dichloromethane (5 mL), and mixed with ether (200 mL), leading to a white turbid solution. Upon centrifugation, pale yellow ZIL was precipitated. After the collection of the precipitate and ether washing, the residue was purified by silica gel chromatography (dichloromethane/methanol = 15/1, v/v) to afford the desired ZIL product as pale yellow liquid.

## References:

1. *J. Med. Chem.* **2014**, *57*, 6183-6196.
2. *J. Am. Chem. Soc.* **2004**, *126*, 1110-1124.
3. *Chem. Eur. J.* **2014**, *20*, 12894-12900.

**ZIL 1a** pale yellow liquid;  $^1\text{H}$  NMR (400 MHz,  $\text{DMSO-}d_6$ )  $\delta$  2.05-2.18 (m,  $\text{N}^+\text{CH}_2\text{CH}_2\text{CH}_2\text{S}$ , 2H), 3.0-3.11 (m,  $\text{N}^+\text{CH}_2\text{CH}_2\text{CH}_2\text{S}$ , 2H), 3.07 (s,  $2 \times \text{N}^+\text{CH}_3$ , 6H), 3.24 (s,  $\text{OCH}_3$ , 3H), 3.40-3.49 (m,  $\text{N}^+\text{CH}_2\text{CH}_2\text{CH}_2\text{S} + \text{N}^+\text{CH}_2\text{CH}_3\text{O}$ , 4H), 3.49-3.61 (m,  $4 \times \text{CH}_2$ , 8H), 3.79-3.86 (m,  $\text{CH}_2\text{OCH}_3$ , 2H);  $^{13}\text{C}$  NMR (100 MHz,  $\text{DMSO-}d_6$ )  $\delta$  17.73, 51.00, 51.20, 62.33, 63.83, 69.42, 69.46, 71.25, 120.07 (q,  $J_{\text{CF}} = 322$  Hz);  $^{19}\text{F}$  NMR (376 MHz,  $\text{DMSO-}d_6$ )  $\delta$  -76.52 ( $\text{CF}_3$ , 3F); ESI-HRMS  $m/z$   $[\text{M} + \text{H}]^+$  calculated for  $\text{C}_{13}\text{H}_{28}\text{F}_3\text{N}_2\text{O}_7\text{S}_2$  445.1285, found 445.1287 ( $[\text{M} + \text{H}]^+$ ), 467.1106 ( $[\text{M} + \text{Na}]^+$ ), 483.0846 ( $[\text{M} + \text{K}]^+$ ).

**ZIL 1b** pale yellow liquid;  $^1\text{H}$  NMR (400 MHz,  $\text{DMSO-}d_6$ )  $\delta$  1.23 (t,  $J = 6.0$  Hz,  $\text{N}^+\text{CH}_2\text{CH}_3$ , 3H), 2.00-2.15 (m,  $\text{N}^+\text{CH}_2\text{CH}_2\text{CH}_2\text{S}$ , 2H), 3.01 (s,  $\text{N}^+\text{CH}_3$ , 3H), 3.06 (t,  $J = 7.2$  Hz,  $\text{N}^+\text{CH}_2\text{CH}_2\text{CH}_2\text{S}$ , 2H), 3.24 (s,  $\text{OCH}_3$ , 3H), 3.36-3.46 (m,  $\text{N}^+\text{CH}_2\text{CH}_2\text{CH}_2\text{S} + \text{N}^+\text{CH}_2\text{CH}_3 + \text{N}^+\text{CH}_2\text{CH}_3\text{O}$ , 6H), 3.48-3.60 (m,  $4 \times \text{CH}_2$ , 8H), 3.78-3.84 (m,  $\text{CH}_2\text{OCH}_3$ , 2H);  $^{13}\text{C}$  NMR (100 MHz,  $\text{DMSO-}d_6$ )  $\delta$  7.53, 17.41, 47.84, 51.14, 57.38, 58.06, 59.01, 59.88, 63.66, 69.46, 69.49, 69.56, 71.27, 120.08 (q,  $J_{\text{CF}} = 322$  Hz);  $^{19}\text{F}$  NMR (376 MHz,  $\text{DMSO-}d_6$ )  $\delta$  -76.53 ( $\text{CF}_3$ , 3F); ESI-HRMS  $m/z$   $[\text{M} + \text{H}]^+$  calculated for  $\text{C}_{14}\text{H}_{30}\text{F}_3\text{N}_2\text{O}_7\text{S}_2$  459.1441, found 459.1445 ( $[\text{M} + \text{H}]^+$ ), 481.1265 ( $[\text{M} + \text{Na}]^+$ ), 497.0999 ( $[\text{M} + \text{K}]^+$ ).

**ZIL 1c** pale yellow liquid;  $^1\text{H}$  NMR (400 MHz,  $\text{DMSO-}d_6$ )  $\delta$  0.93 (t,  $J = 7.2$  Hz,  $\text{CH}_2\text{CH}_2\text{CH}_3$ , 3H), 1.24-1.37 (m,  $\text{N}^+\text{CH}_2\text{CH}_2\text{CH}_2$ , 2H), 1.58-1.71 (m,  $\text{N}^+\text{CH}_2\text{CH}_2\text{CH}_2$ , 2H), 2.02-2.16 (m,  $\text{N}^+\text{CH}_2\text{CH}_2\text{CH}_2\text{S}$ , 2H), 3.03 (s,  $\text{N}^+\text{CH}_3$ , 3H), 3.06 (t,  $J = 7.2$  Hz,  $\text{N}^+\text{CH}_2\text{CH}_2\text{CH}_2$ , 2H), 3.24 (s,  $\text{OCH}_3$ , 3H), 3.26-3.36 (m,  $\text{N}^+\text{CH}_2\text{CH}_2\text{CH}_2\text{S}$ , 2H), 3.39-3.47 (m,  $\text{N}^+\text{CH}_2\text{CH}_2\text{CH}_2\text{S} + \text{N}^+\text{CH}_2\text{CH}_3\text{O}$ , 4H), 3.48-3.62 (m,  $4 \times \text{CH}_2$ , 8H), 3.78-3.86 (m,  $\text{CH}_2\text{OCH}_3$ , 2H);  $^{13}\text{C}$  NMR (100 MHz,  $\text{DMSO-}d_6$ )  $\delta$  13.49, 17.52, 19.20, 23.43, 48.41, 51.17, 58.11, 57.29, 59.65, 60.45, 61.69, 63.74, 69.64, 71.31, 120.12 (q,  $J_{\text{CF}} = 322$  Hz);  $^{19}\text{F}$  NMR (376 MHz,  $\text{DMSO-}d_6$ )  $\delta$  -76.56 ( $\text{CF}_3$ , 3F); ESI-HRMS  $m/z$   $[\text{M} + \text{H}]^+$  calculated for  $\text{C}_{16}\text{H}_{34}\text{F}_3\text{N}_2\text{O}_7\text{S}_2$  487.1754, found 487.1755 ( $[\text{M} + \text{H}]^+$ ), 509.1576 ( $[\text{M} + \text{Na}]^+$ ), 525.1316 ( $[\text{M} + \text{K}]^+$ ).

**ZIL 1d** pale yellow liquid;  $^1\text{H}$  NMR (400 MHz,  $\text{DMSO-}d_6$ )  $\delta$  0.87 (t,  $J = 6.8$  Hz,  $\text{CH}_2\text{CH}_2\text{CH}_3$ , 3H), 1.20-1.38 (m,  $3 \times \text{CH}_2$ , 6H), 1.56-1.74 (m,  $\text{N}^+\text{CH}_2\text{CH}_2\text{CH}_2$ , 2H), 2.02-2.16 (m,  $\text{N}^+\text{CH}_2\text{CH}_2\text{CH}_2\text{S}$ , 2H), 3.03 (s,  $\text{N}^+\text{CH}_3$ , 3H), 3.05 (t,  $J = 6.8$  Hz,  $\text{N}^+\text{CH}_2\text{CH}_2\text{CH}_2$ , 2H), 3.24 (s,  $\text{OCH}_3$ , 3H), 3.26-3.32 (m,  $\text{N}^+\text{CH}_2\text{CH}_2\text{CH}_2\text{S}$ , 2H), 3.39-3.47 (m,  $\text{N}^+\text{CH}_2\text{CH}_2\text{CH}_2\text{S} + \text{N}^+\text{CH}_2\text{CH}_3\text{O}$ , 4H), 3.49-3.62 (m,  $4 \times \text{CH}_2$ , 8H), 3.77-3.85 (m,  $\text{CH}_2\text{OCH}_3$ , 2H);  $^{13}\text{C}$  NMR (100 MHz,  $\text{DMSO-}d_6$ )  $\delta$  13.78, 17.47, 21.36, 21.88, 25.39, 30.65, 48.30, 51.11, 58.04, 59.62, 62.36, 61.83, 63.69, 69.49, 69.57, 71.26, 120.06 (q,  $J_{\text{CF}} = 322$  Hz);  $^{19}\text{F}$  NMR (376 MHz,  $\text{DMSO-}d_6$ )  $\delta$  -76.57 ( $\text{CF}_3$ , 3F); ESI-

HRMS  $m/z$   $[M + H]^+$  calculated for  $C_{18}H_{38}F_3N_2O_7S_2$  515.2067, found 515.2065 ( $[M + H]^+$ ), 537.1882 ( $[M + Na]^+$ ).

**ZIL 1e** pale yellow liquid;  $^1H$  NMR (400 MHz, DMSO- $d_6$ )  $\delta$  0.86 (t,  $J = 6.8$  Hz,  $CH_2CH_2CH_3$ , 3H), 1.17-1.42 (m,  $5 \times CH_2$ , 10H), 1.56-1.75 (m,  $N^+CH_2CH_2CH_2$ , 2H), 2.00-2.17 (m,  $N^+CH_2CH_2CH_2S$ , 2H), 3.02 (s,  $N^+CH_3$ , 3H), 3.05 (t,  $J = 7.2$  Hz,  $N^+CH_2CH_2CH_2$ , 2H), 3.24 (s,  $OCH_3$ , 3H), 3.26-3.32 (m,  $N^+CH_2CH_2CH_2S$ , 2H), 3.38-3.47 (m,  $N^+CH_2CH_2CH_2S + N^+CH_2CH_3O$ , 4H), 3.49-3.66 (m,  $4 \times CH_2$ , 8H), 3.76-3.87 (m,  $CH_2OCH_3$ , 2H);  $^{13}C$  NMR (100 MHz, DMSO- $d_6$ )  $\delta$  13.92, 17.46, 21.41, 22.02, 25.75, 28.45, 28.47, 31.15, 48.29, 51.10, 58.04, 59.61, 60.34, 61.82, 63.68, 69.48, 69.56, 71.25, 120.05 (q,  $J_{CF} = 322$  Hz);  $^{19}F$  NMR (376 MHz, DMSO- $d_6$ )  $\delta$  -76.57 ( $CF_3$ , 3F); ESI-HRMS  $m/z$   $[M + H]^+$  calculated for  $C_{20}H_{42}F_3N_2O_7S_2$  543.2380, found 543.2387 ( $[M + H]^+$ ), 565.2207 ( $[M + Na]^+$ ).

**ZIL 2a** pale yellow liquid;  $^1H$  NMR (400 MHz, DMSO- $d_6$ )  $\delta$  2.05-2.17 (m,  $N^+CH_2CH_2CH_2S$ , 2H), 3.00-3.14 (m,  $N^+CH_2CH_2CH_2S$ , 2H), 3.08 (s,  $2 \times N^+CH_3$ , 6H), 3.24 (s,  $OCH_3$ , 3H), 3.40-3.49 (m,  $N^+CH_2CH_2CH_2S + N^+CH_2CH_3O$ , 4H), 3.49-3.62 (m,  $6 \times CH_2$ , 12H), 3.79-3.88 (m,  $CH_2OCH_3$ , 2H);  $^{13}C$  NMR (100 MHz, DMSO- $d_6$ )  $\delta$  17.72, 51.00, 51.20, 58.04, 63.81, 69.43, 69.54, 69.70, 69.76, 71.27, 120.06 (q,  $J_{CF} = 322$  Hz);  $^{19}F$  NMR (376 MHz, DMSO- $d_6$ )  $\delta$  -76.52 ( $CF_3$ , 3F); ESI-HRMS  $m/z$   $[M + H]^+$  calculated for  $C_{15}H_{32}F_3N_2O_8S_2$  489.1547, found 489.1538 ( $[M + H]^+$ ), 511.1357 ( $[M + Na]^+$ ).

**ZIL 2b** pale yellow liquid;  $^1H$  NMR (400 MHz, DMSO- $d_6$ )  $\delta$  1.23 (t,  $J = 7.2$  Hz,  $N^+CH_2CH_3$ , 3H), 2.00-2.15 (m,  $N^+CH_2CH_2CH_2S$ , 2H), 3.01 (s,  $N^+CH_3$ , 3H), 3.06 (t,  $J = 7.2$  Hz,  $N^+CH_2CH_2CH_2S$ , 2H), 3.24 (s,  $OCH_3$ , 3H), 3.36-3.46 (m,  $N^+CH_2CH_2CH_2S + N^+CH_2CH_3 + N^+CH_2CH_3O$ , 6H), 3.47-3.62 (m,  $6 \times CH_2$ , 12H), 3.78-3.86 (m,  $CH_2OCH_3$ , 2H);  $^{13}C$  NMR (100 MHz, DMSO- $d_6$ )  $\delta$  7.52, 17.40, 47.86, 51.13, 57.34, 58.05, 58.99, 59.85, 63.63, 69.46, 69.56, 69.72, 69.79, 71.29, 120.07 (q,  $J_{CF} = 322$  Hz);  $^{19}F$  NMR (376 MHz, DMSO- $d_6$ )  $\delta$  -76.53 ( $CF_3$ , 3F); ESI-HRMS  $m/z$   $[M + H]^+$  calculated for  $C_{16}H_{34}F_3N_2O_8S_2$  503.1703, found 503.1694 ( $[M + H]^+$ ), 525.1513 ( $[M + Na]^+$ ).

**ZIL 2c** pale yellow liquid;  $^1H$  NMR (400 MHz, DMSO- $d_6$ )  $\delta$  0.93 (t,  $J = 7.2$  Hz,  $CH_2CH_2CH_3$ , 3H), 1.22-1.36 (m,  $N^+CH_2CH_2CH_2$ , 2H), 1.57-1.71 (m,  $N^+CH_2CH_2CH_2$ , 2H), 2.02-2.16 (m,  $N^+CH_2CH_2CH_2S$ , 2H), 3.03 (s,  $N^+CH_3$ , 3H), 3.06 (t,  $J = 6.8$  Hz,  $N^+CH_2CH_2CH_2$ , 2H), 3.24 (s,  $OCH_3$ , 3H), 3.26-3.36 (m,  $N^+CH_2CH_2CH_2S$ , 2H), 3.38-3.46 (m,  $N^+CH_2CH_2CH_2S + N^+CH_2CH_3O$ , 4H), 3.48-3.62 (m,  $6 \times CH_2$ , 12H), 3.78-3.87

(m,  $\text{CH}_2\text{OCH}_3$ , 2H);  $^{13}\text{C}$  NMR (100 MHz,  $\text{DMSO-}d_6$ )  $\delta$  13.43, 17.47, 19.15, 23.37, 48.37, 51.11, 58.04, 59.59, 60.38, 61.59, 63.67, 69.49, 69.57, 69.73, 69.78, 71.29, 120.06 (q,  $J_{\text{CF}} = 322$  Hz);  $^{19}\text{F}$  NMR (376 MHz,  $\text{DMSO-}d_6$ )  $\delta$  -76.56 ( $\text{CF}_3$ , 3F); ESI-HRMS  $m/z$   $[\text{M} + \text{H}]^+$  calculated for  $\text{C}_{18}\text{H}_{38}\text{F}_3\text{N}_2\text{O}_8\text{S}_2$  531.2016, found 531.2011 ( $[\text{M} + \text{H}]^+$ ), 553.1829 ( $[\text{M} + \text{Na}]^+$ ).

**ZIL 2d** pale yellow liquid;  $^1\text{H}$  NMR (400 MHz,  $\text{DMSO-}d_6$ )  $\delta$  0.87 (t,  $J = 6.8$  Hz,  $\text{CH}_2\text{CH}_2\text{CH}_3$ , 3H), 1.20-1.36 (m,  $3 \times \text{CH}_2$ , 6H), 1.56-1.72 (m,  $\text{N}^+\text{CH}_2\text{CH}_2\text{CH}_2$ , 2H), 2.00-2.16 (m,  $\text{N}^+\text{CH}_2\text{CH}_2\text{CH}_2\text{S}$ , 2H), 3.03 (s,  $\text{N}^+\text{CH}_3$ , 3H), 3.05 (t,  $J = 7.2$  Hz,  $\text{N}^+\text{CH}_2\text{CH}_2\text{CH}_2$ , 2H), 3.24 (s,  $\text{OCH}_3$ , 3H), 3.26-3.32 (m,  $\text{N}^+\text{CH}_2\text{CH}_2\text{CH}_2\text{S}$ , 2H), 3.38-3.46 (m,  $\text{N}^+\text{CH}_2\text{CH}_2\text{CH}_2\text{S} + \text{N}^+\text{CH}_2\text{CH}_3\text{O}$ , 4H), 3.48-3.62 (m,  $6 \times \text{CH}_2$ , 12H), 3.77-3.86 (m,  $\text{CH}_2\text{OCH}_3$ , 2H);  $^{13}\text{C}$  NMR (100 MHz,  $\text{DMSO-}d_6$ )  $\delta$  13.77, 17.45, 21.34, 21.86, 25.38, 30.63, 30.89, 48.32, 51.10, 58.03, 59.59, 60.33, 61.79, 63.65, 69.47, 69.55, 69.71, 69.76, 71.27, 120.05 (q,  $J_{\text{CF}} = 322$  Hz);  $^{19}\text{F}$  NMR (376 MHz,  $\text{DMSO-}d_6$ )  $\delta$  -76.56 ( $\text{CF}_3$ , 3F); ESI-HRMS  $m/z$   $[\text{M} + \text{H}]^+$  calculated for  $\text{C}_{20}\text{H}_{42}\text{F}_3\text{N}_2\text{O}_8\text{S}_2$  559.2329, found 559.2321 ( $[\text{M} + \text{H}]^+$ ), 581.2142 ( $[\text{M} + \text{Na}]^+$ ).

**ZIL 2e** pale yellow liquid;  $^1\text{H}$  NMR (400 MHz,  $\text{DMSO-}d_6$ )  $\delta$  0.86 (t,  $J = 7.2$  Hz,  $\text{CH}_2\text{CH}_2\text{CH}_3$ , 3H), 1.18-1.39 (m,  $5 \times \text{CH}_2$ , 10H), 1.58-1.72 (m,  $\text{N}^+\text{CH}_2\text{CH}_2\text{CH}_2$ , 2H), 2.00-2.16 (m,  $\text{N}^+\text{CH}_2\text{CH}_2\text{CH}_2\text{S}$ , 2H), 3.02 (s,  $\text{N}^+\text{CH}_3$ , 3H), 3.05 (t,  $J = 7.2$  Hz,  $\text{N}^+\text{CH}_2\text{CH}_2\text{CH}_2$ , 2H), 3.24 (s,  $\text{OCH}_3$ , 3H), 3.26-3.32 (m,  $\text{N}^+\text{CH}_2\text{CH}_2\text{CH}_2\text{S}$ , 2H), 3.39-3.47 (m,  $\text{N}^+\text{CH}_2\text{CH}_2\text{CH}_2\text{S} + \text{N}^+\text{CH}_2\text{CH}_3\text{O}$ , 4H), 3.47-3.64 (m,  $6 \times \text{CH}_2$ , 12H), 3.78-3.86 (m,  $\text{CH}_2\text{OCH}_3$ , 2H);  $^{13}\text{C}$  NMR (100 MHz,  $\text{DMSO-}d_6$ )  $\delta$  13.92, 17.46, 21.40, 22.02, 25.76, 28.46, 31.15, 48.32, 51.10, 58.04, 59.60, 60.33, 61.80, 63.66, 69.48, 69.60, 69.72, 69.77, 71.27, 120.05 (q,  $J_{\text{CF}} = 322$  Hz);  $^{19}\text{F}$  NMR (376 MHz,  $\text{DMSO-}d_6$ )  $\delta$  -76.57 ( $\text{CF}_3$ , 3F); ESI-HRMS  $m/z$   $[\text{M} + \text{H}]^+$  calculated for  $\text{C}_{22}\text{H}_{46}\text{F}_3\text{N}_2\text{O}_8\text{S}_2$  587.2642, found 587.2636 ( $[\text{M} + \text{H}]^+$ ), 609.2456 ( $[\text{M} + \text{Na}]^+$ ).



## Synthesis of ZIL 3c and 4c

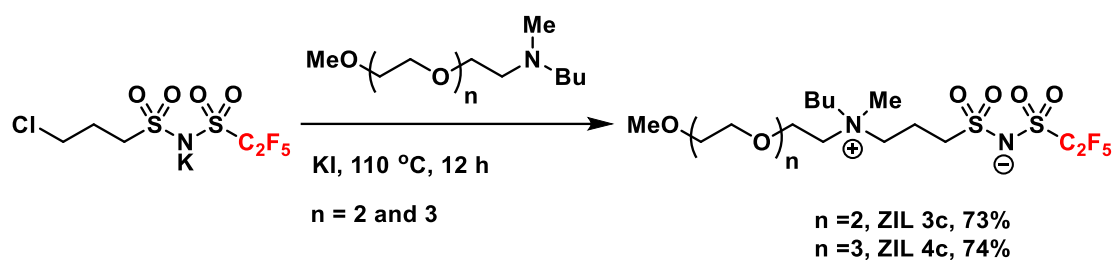

To a reaction vial containing potassium *N*-(3-chloropropylsulfonyl) pentafluoroethylsulfonamide (150 mg, 0.397 mmol) and potassium iodide (6.6 mg, 0.1 equiv) was added tertiary amine (2 equiv). The mixture was heated at 100 °C for 12 h. After completion of reaction, acetonitrile was added to the vial for precipitation of potassium chloride. The solid salt was filtered off, and its filtrate was concentrated under reduced pressure to obtain yellow liquid crude ZIL product. With the aid of sonication, excessive amine in crude product could be washed away by ether. This crude product was then dissolved in dichloromethane (5 mL), and mixed with ether (200 mL), leading to a white turbid solution. Upon centrifugation, pale yellow ZIL was precipitated. After the collection of the precipitate and ether washing, the residue was purified by silica gel chromatography (dichloromethane/methanol = 15/1, v/v) to afford the desired ZIL product as pale yellow liquid.

**ZIL 3c** pale yellow liquid;  $^1\text{H}$  NMR (400 MHz,  $\text{DMSO-}d_6$ )  $\delta$  0.93 (t,  $J = 7.2$  Hz,  $\text{CH}_2\text{CH}_2\text{CH}_3$ , 3H), 1.24-1.37 (m,  $\text{N}^+\text{CH}_2\text{CH}_2\text{CH}_2$ , 2H), 1.58-1.71 (m,  $\text{N}^+\text{CH}_2\text{CH}_2\text{CH}_2$ , 2H), 2.02-2.16 (m,  $\text{N}^+\text{CH}_2\text{CH}_2\text{CH}_2\text{S}$ , 2H), 3.03 (s,  $\text{N}^+\text{CH}_3$ , 3H), 3.06 (t,  $J = 6.8$  Hz,  $\text{N}^+\text{CH}_2\text{CH}_2\text{CH}_2$ , 2H), 3.28 (s,  $\text{OCH}_3$ , 3H), 3.26-3.36 (m,  $\text{N}^+\text{CH}_2\text{CH}_2\text{CH}_2\text{S}$ , 2H), 3.38-3.47 (m,  $\text{N}^+\text{CH}_2\text{CH}_2\text{CH}_2\text{S} + \text{N}^+\text{CH}_2\text{CH}_3\text{O}$ , 4H), 3.49-3.62 (m,  $4 \times \text{CH}_2$ , 8H), 3.77-3.86 (m,  $\text{CH}_2\text{OCH}_3$ , 2H);  $^{13}\text{C}$  NMR (100 MHz,  $\text{DMSO-}d_6$ )  $\delta$  13.39, 17.46, 19.13, 23.37, 48.33, 51.31, 58.02, 59.60, 60.39, 61.61, 63.68, 69.48, 69.57, 71.25, 111.53 (qt,  $^1J = 291$  Hz,  $^2J = 37$  Hz,  $\text{CF}_2\text{CF}_3$ ), 118.14 (tq,  $^1J = 286$  Hz,  $^2J = 34$  Hz,  $\text{CF}_2\text{CF}_3$ );  $^{19}\text{F}$  NMR (376 MHz,  $\text{DMSO-}d_6$ )  $\delta$  -76.60 ( $\text{CF}_2\text{CF}_3$ , 3F), -115.75 ( $\text{CF}_2\text{CF}_3$ , 2F); ESI-HRMS  $m/z$   $[\text{M} + \text{H}]^+$  calculated for  $\text{C}_{17}\text{H}_{34}\text{F}_5\text{N}_2\text{O}_7\text{S}_2$  537.1722, found 537.1714 ( $[\text{M} + \text{H}]^+$ ), 559.1533 ( $[\text{M} + \text{Na}]^+$ ).

**ZIL 4c** pale yellow liquid;  $^1\text{H}$  NMR (400 MHz,  $\text{DMSO-}d_6$ )  $\delta$  0.93 (t,  $J = 7.2$  Hz,  $\text{CH}_2\text{CH}_2\text{CH}_3$ , 3H), 1.21-1.37 (m,  $\text{N}^+\text{CH}_2\text{CH}_2\text{CH}_2$ , 2H), 1.56-1.72 (m,  $\text{N}^+\text{CH}_2\text{CH}_2\text{CH}_2$ , 2H), 2.02-2.17 (m,  $\text{N}^+\text{CH}_2\text{CH}_2\text{CH}_2\text{S}$ , 2H), 3.03 (s,  $\text{N}^+\text{CH}_3$ , 3H), 3.06 (t,  $J = 7.2$  Hz,  $\text{N}^+\text{CH}_2\text{CH}_2\text{CH}_2$ , 2H), 3.24 (s,  $\text{OCH}_3$ , 3H), 3.26-3.36 (m,  $\text{N}^+\text{CH}_2\text{CH}_2\text{CH}_2\text{S}$ , 2H), 3.39-3.47 (m,  $\text{N}^+\text{CH}_2\text{CH}_2\text{CH}_2\text{S} + \text{N}^+\text{CH}_2\text{CH}_3\text{O}$ , 4H), 3.47-3.63 (m,  $6 \times \text{CH}_2$ , 12H), 3.77-3.86 (m,  $\text{CH}_2\text{OCH}_3$ , 2H);  $^{13}\text{C}$  NMR (100 MHz,  $\text{DMSO-}d_6$ )  $\delta$  13.38, 17.45, 19.13, 23.37, 48.35, 51.31, 58.01, 59.59, 60.38, 61.59, 63.66, 69.48, 69.56, 69.72, 69.77, 71.27, 111.52 (qt,  $^1J = 292$  Hz,  $^2J = 37$  Hz,  $\text{CF}_2\text{CF}_3$ ), 118.14 (tq,  $^1J = 286$  Hz,  $^2J = 34$  Hz,  $\text{CF}_2\text{CF}_3$ );  $^{19}\text{F}$  NMR (376 MHz,  $\text{DMSO-}d_6$ )  $\delta$  -76.60 ( $\text{CF}_2\text{CF}_3$ , 3F), -115.74 ( $\text{CF}_2\text{CF}_3$ , 2F); ESI-HRMS  $m/z$   $[\text{M} + \text{H}]^+$  calculated for  $\text{C}_{19}\text{H}_{38}\text{F}_5\text{N}_2\text{O}_8\text{S}_2$  581.1984, found 581.1976 ( $[\text{M} + \text{H}]^+$ ), 603.1795 ( $[\text{M} + \text{Na}]^+$ ).

<sup>1</sup>H NMR spectrum of potassium ((3-chloropropyl)sulfonyl)((trifluoromethyl)sulfonyl)amide

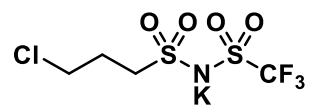

3.76  
3.74  
3.73  
3.11  
3.09  
3.07  
2.50  
2.14  
2.12  
2.11  
2.09  
2.07

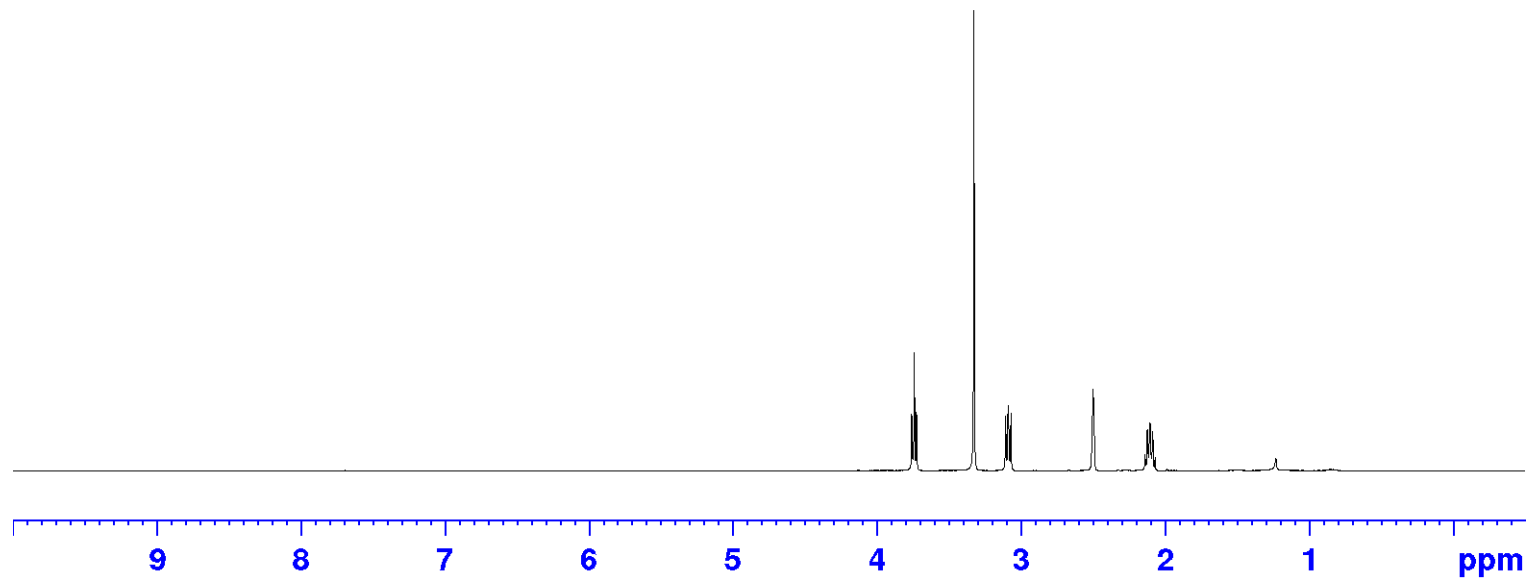

$^{19}\text{F}$  NMR spectrum of potassium ((3-chloropropyl)sulfonyl)((trifluoromethyl)sulfonyl)amide

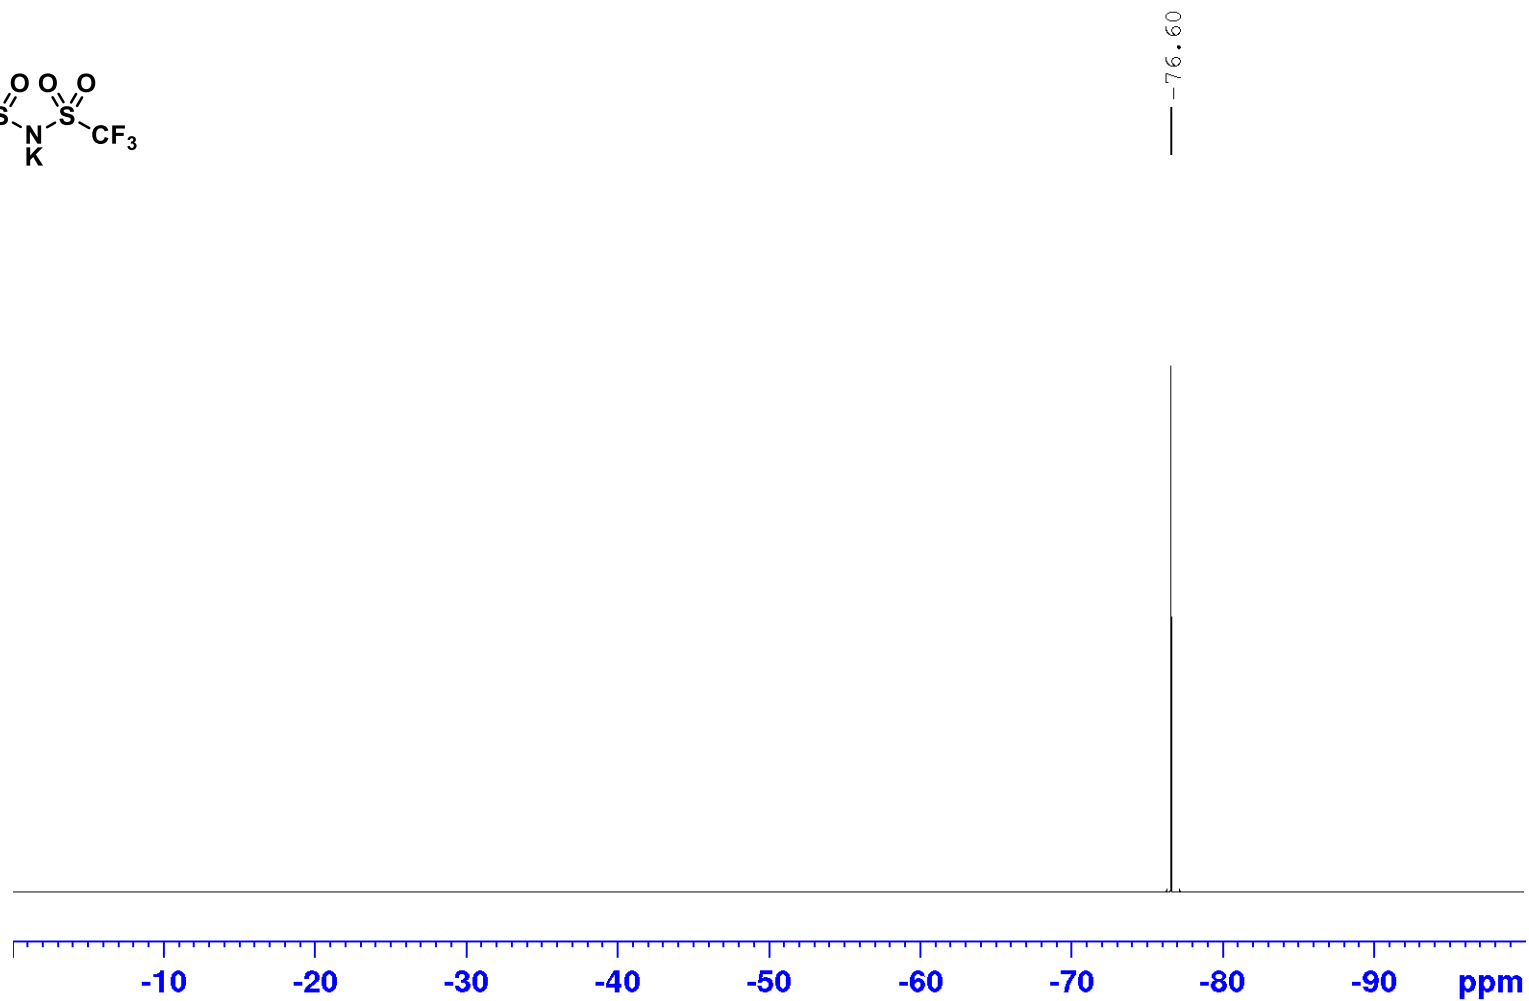

<sup>1</sup>H NMR spectrum of potassium ((3-chloropropyl)sulfonyl)((perfluoroethyl)sulfonyl)amide

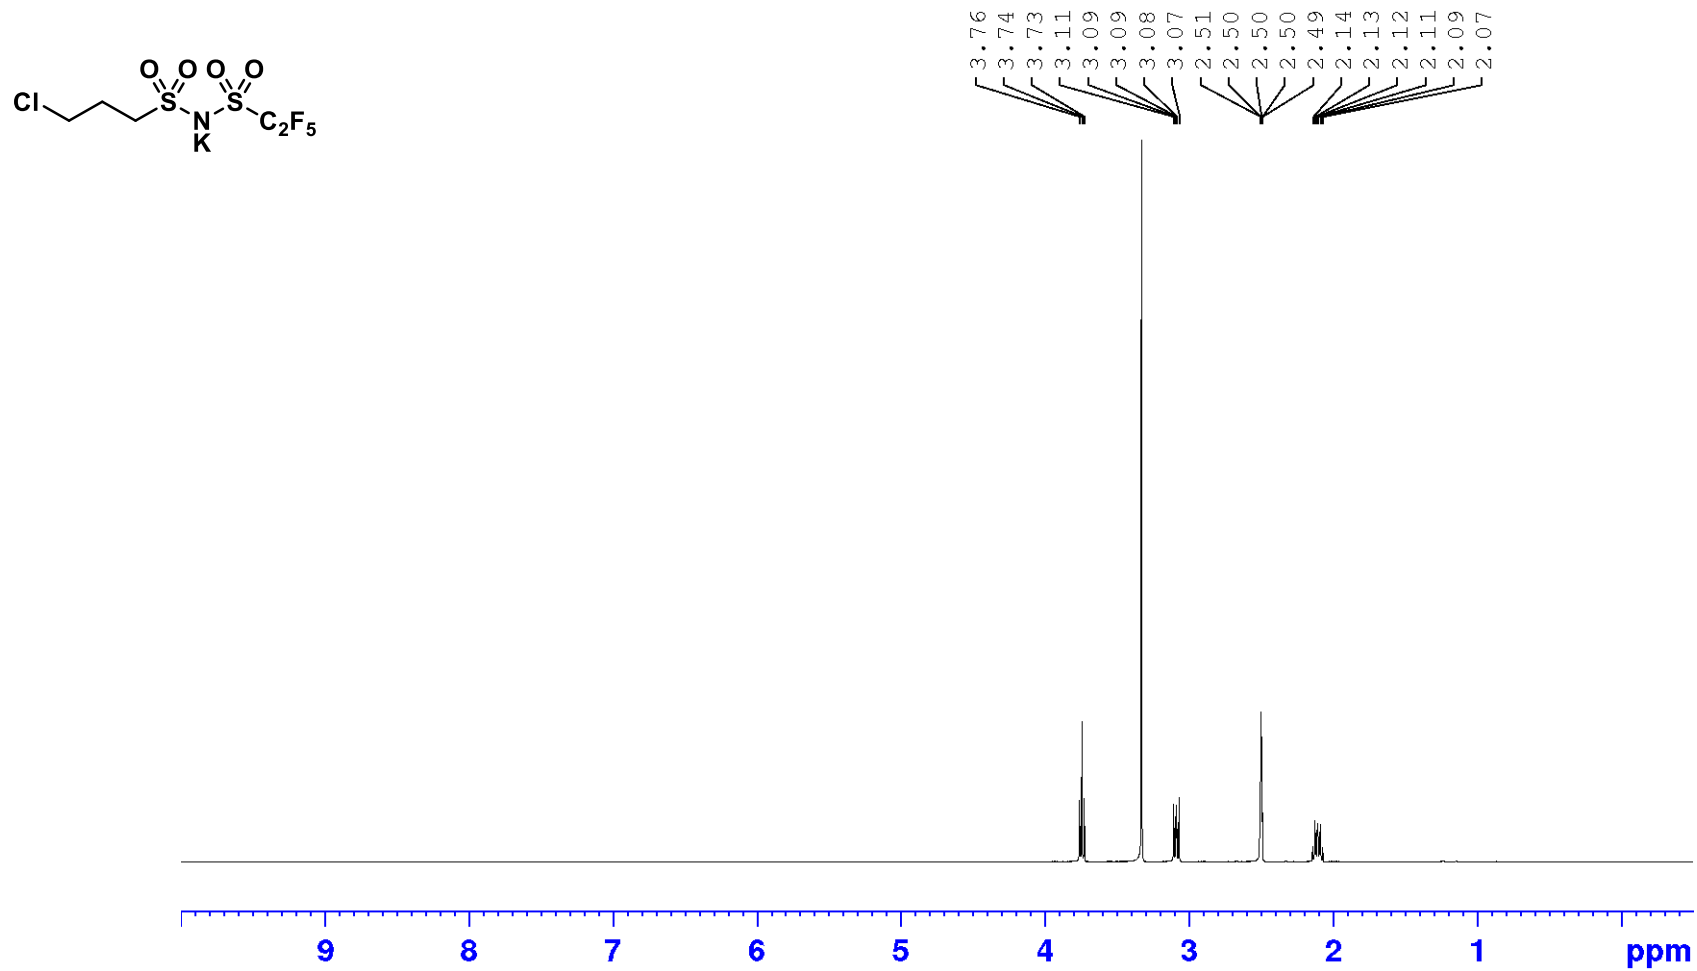

$^{19}\text{F}$  NMR spectrum of potassium ((3-chloropropyl)sulfonyl)((trifluoromethyl)sulfonyl)amide

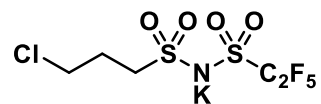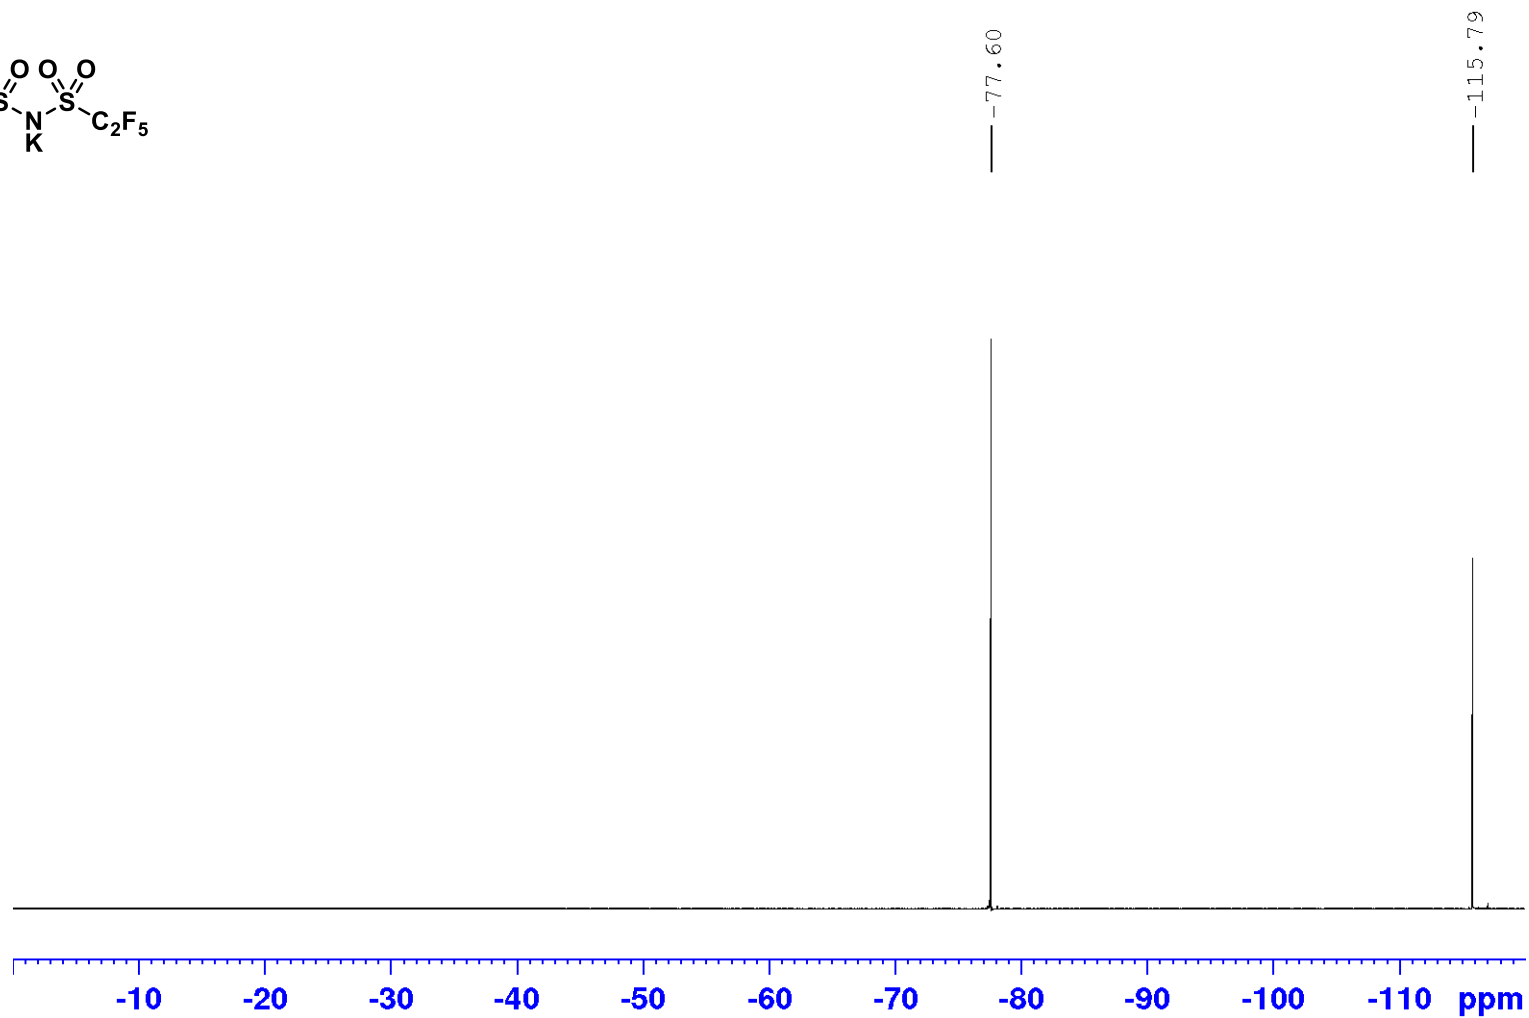

$^1\text{H}$  NMR spectrum of ZIL 1a

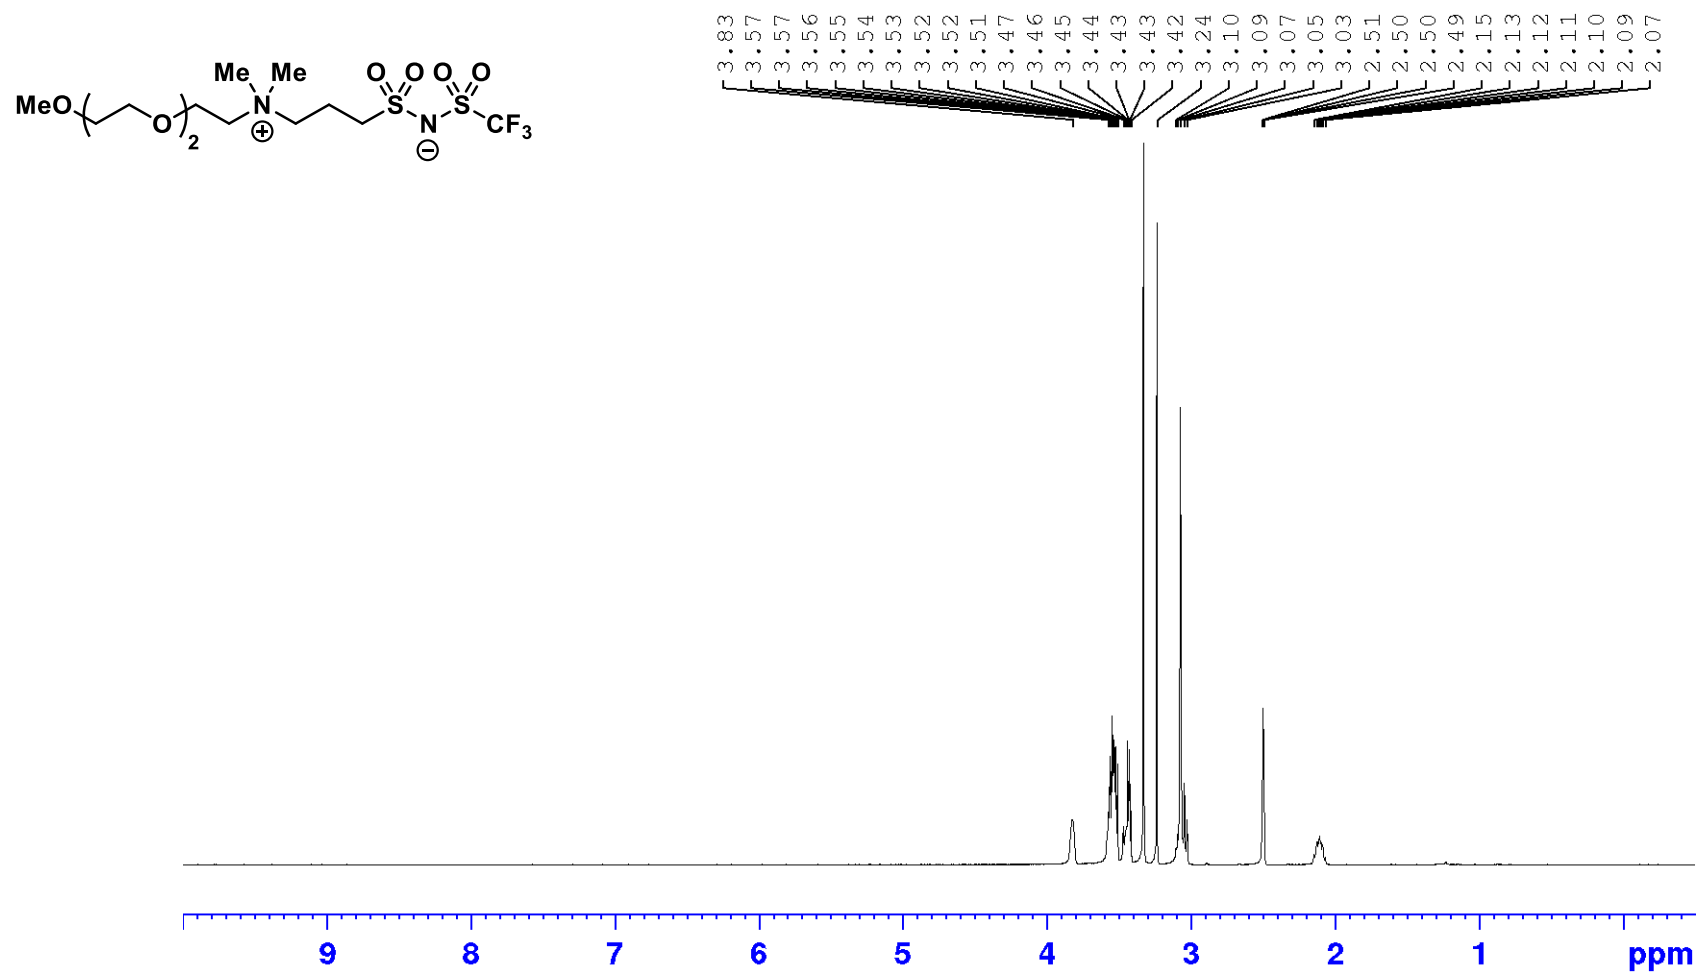

$^{19}\text{F}$  NMR spectrum of ZIL 1a

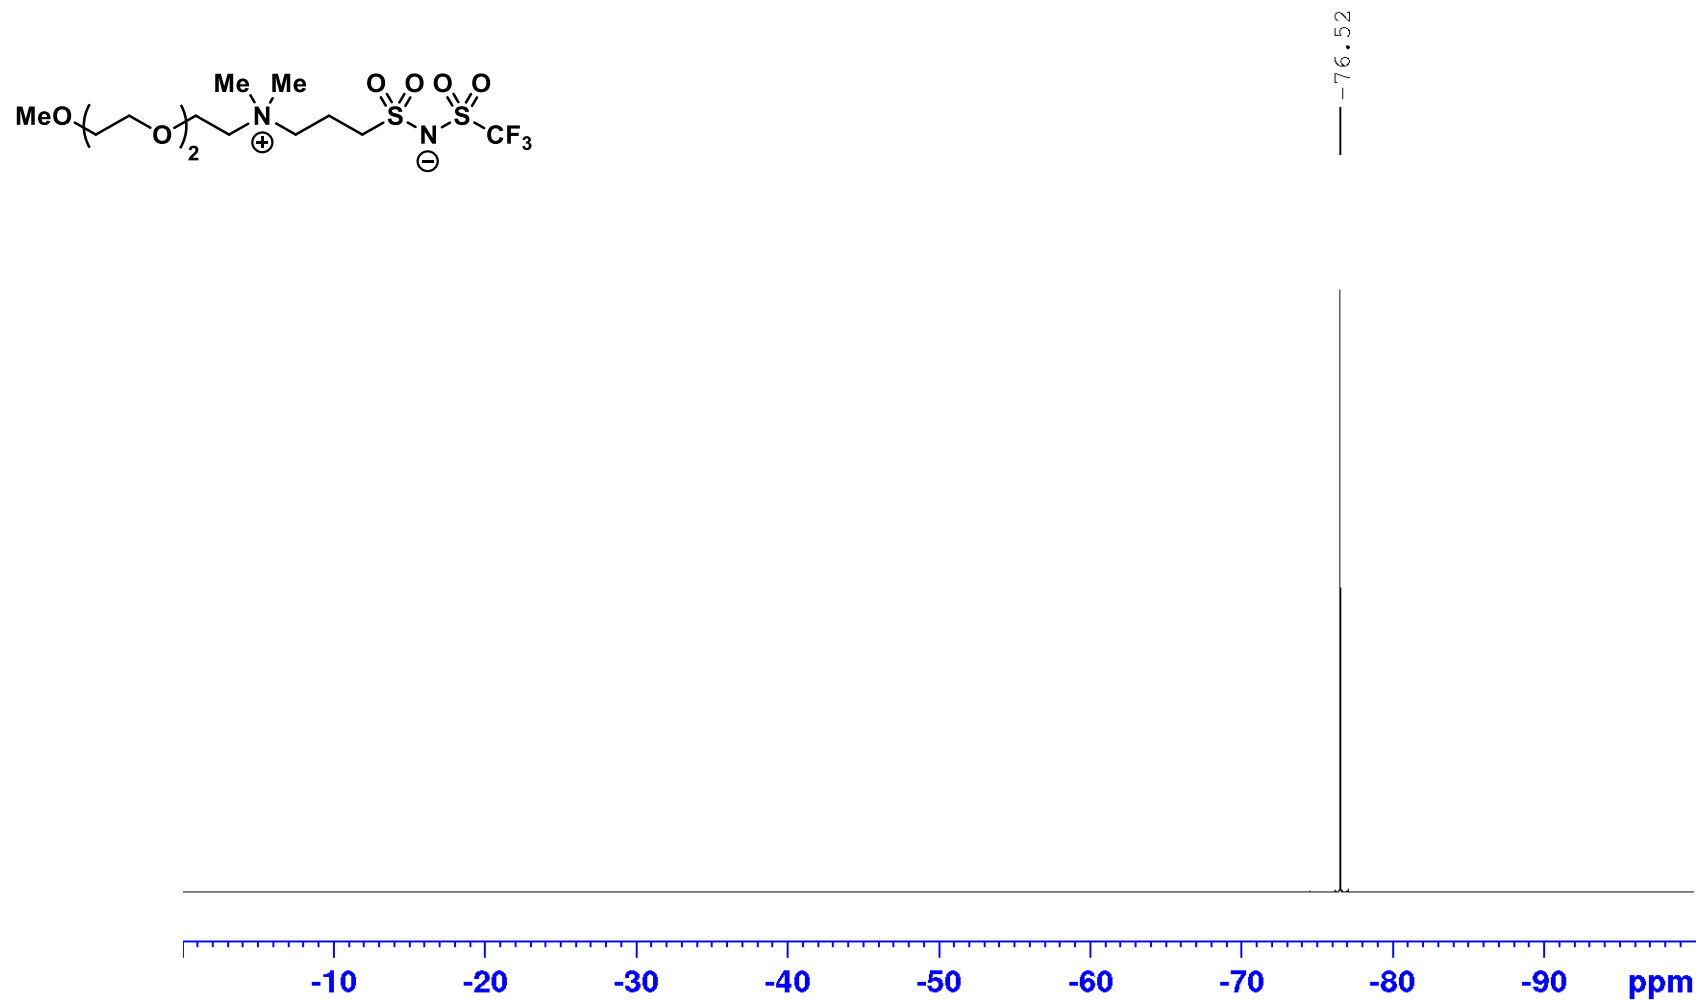



$^{13}\text{C}$  NMR spectrum of ZIL 1a

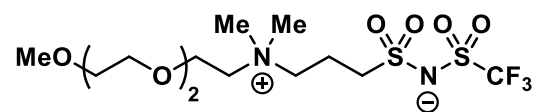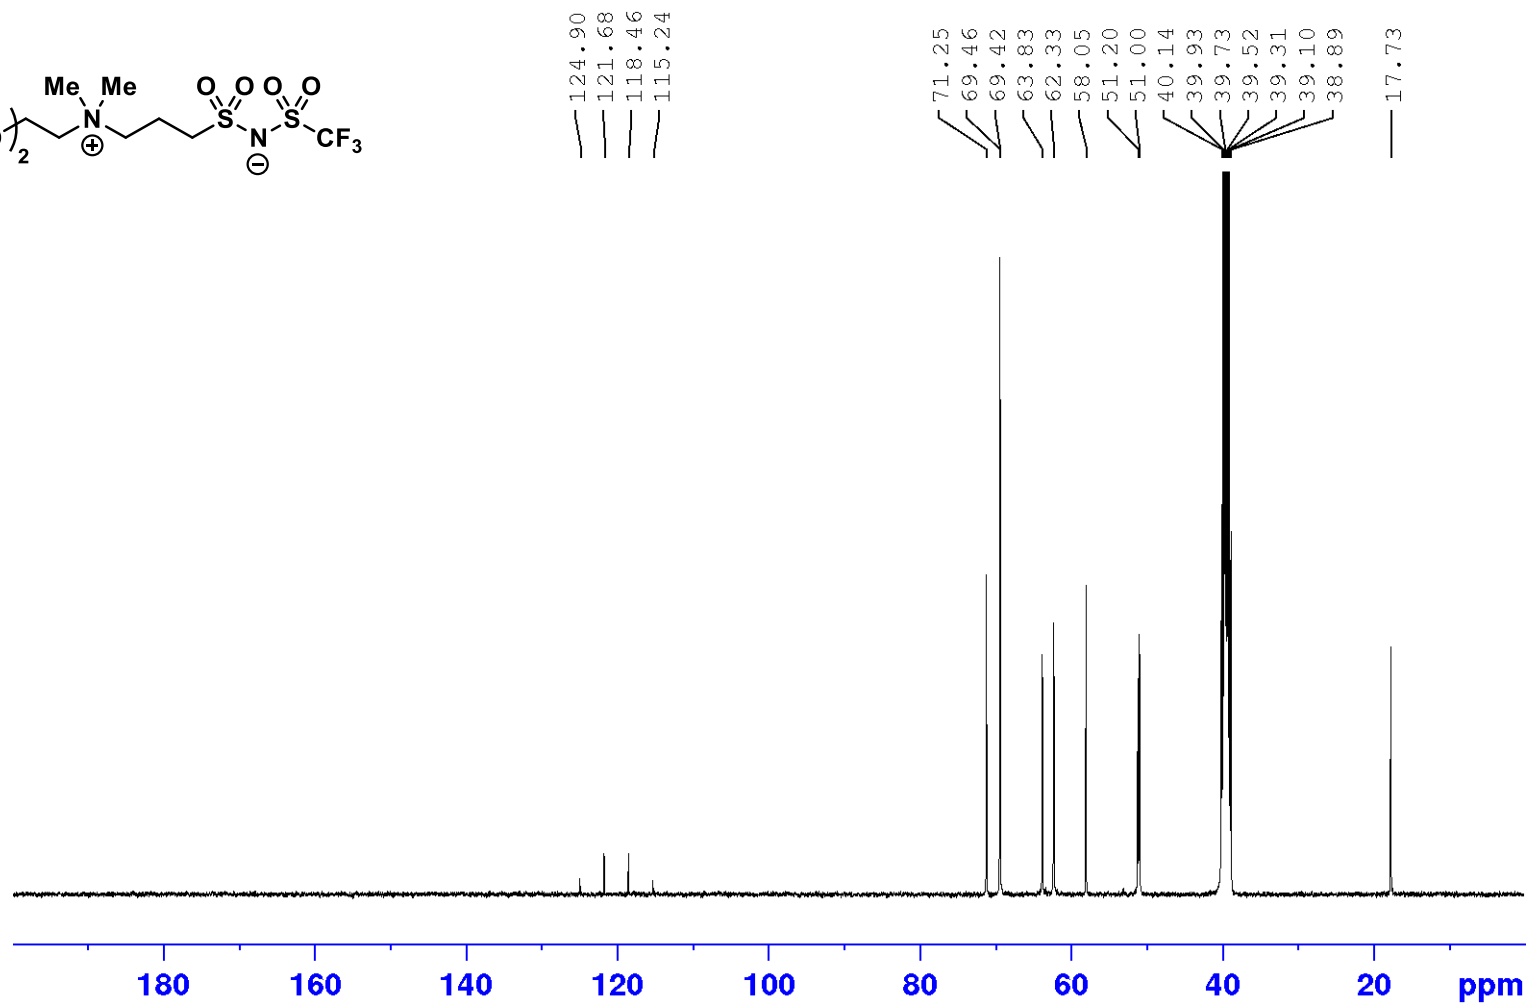

# Mass spectrum of ZIL 1a

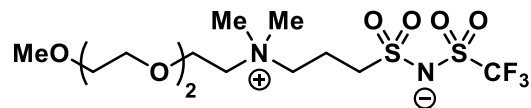

Spectrum

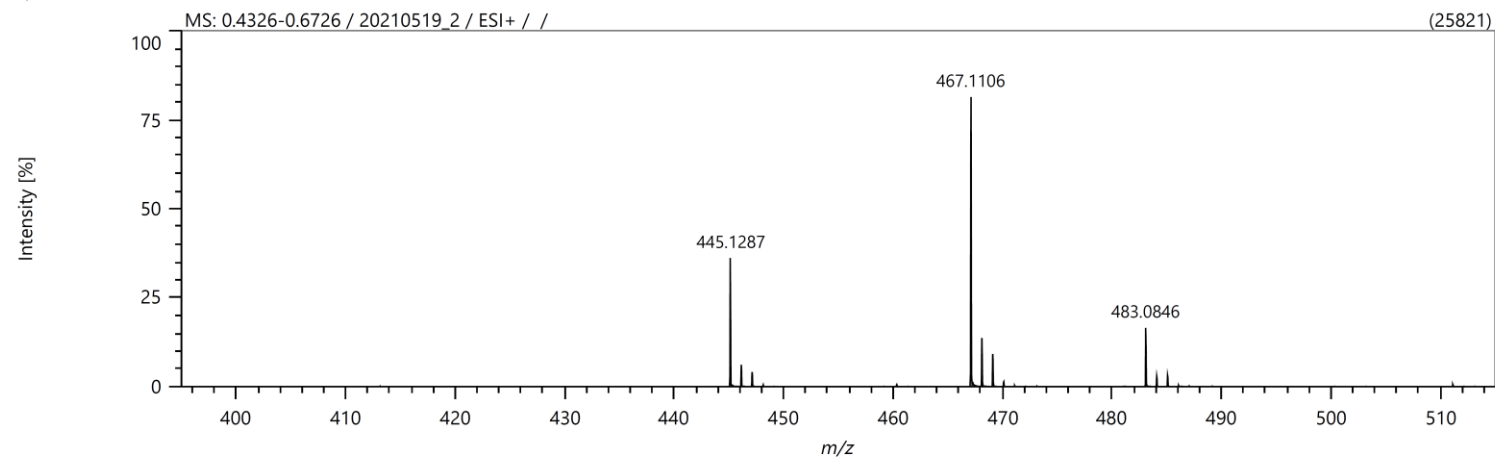

## Elemental Composition

### Parameters

Tolerance:  $\pm 2.00$  ppm  
 Electron: Odd/Even  
 Charge: +1  
 DBE: -99.0 - 999.0

### Elements Set 1:

| Symbol | C   | H    | F | N | O | S | Na | K |
|--------|-----|------|---|---|---|---|----|---|
| Min    | 0   | 0    | 3 | 2 | 7 | 2 | 0  | 0 |
| Max    | 400 | 1000 | 3 | 2 | 7 | 2 | 1  | 1 |

## Results

| Mass      | Formula                                                                                        | Calculated Mass | Mass Difference [mDa] | Mass Difference [ppm] | DBE  |
|-----------|------------------------------------------------------------------------------------------------|-----------------|-----------------------|-----------------------|------|
| 445.12868 | C <sub>13</sub> H <sub>28</sub> N <sub>2</sub> O <sub>7</sub> F <sub>3</sub> S <sub>2</sub>    | 445.12845       | 0.23                  | 0.51                  | -0.5 |
| 467.11059 | C <sub>13</sub> H <sub>27</sub> N <sub>2</sub> O <sub>7</sub> F <sub>3</sub> Na S <sub>2</sub> | 467.11040       | 0.19                  | 0.41                  | -0.5 |
| 483.08460 | C <sub>13</sub> H <sub>27</sub> N <sub>2</sub> O <sub>7</sub> F <sub>3</sub> S <sub>2</sub> K  | 483.08434       | 0.26                  | 0.54                  | -0.5 |

$^1\text{H}$  NMR spectrum of ZIL 1b

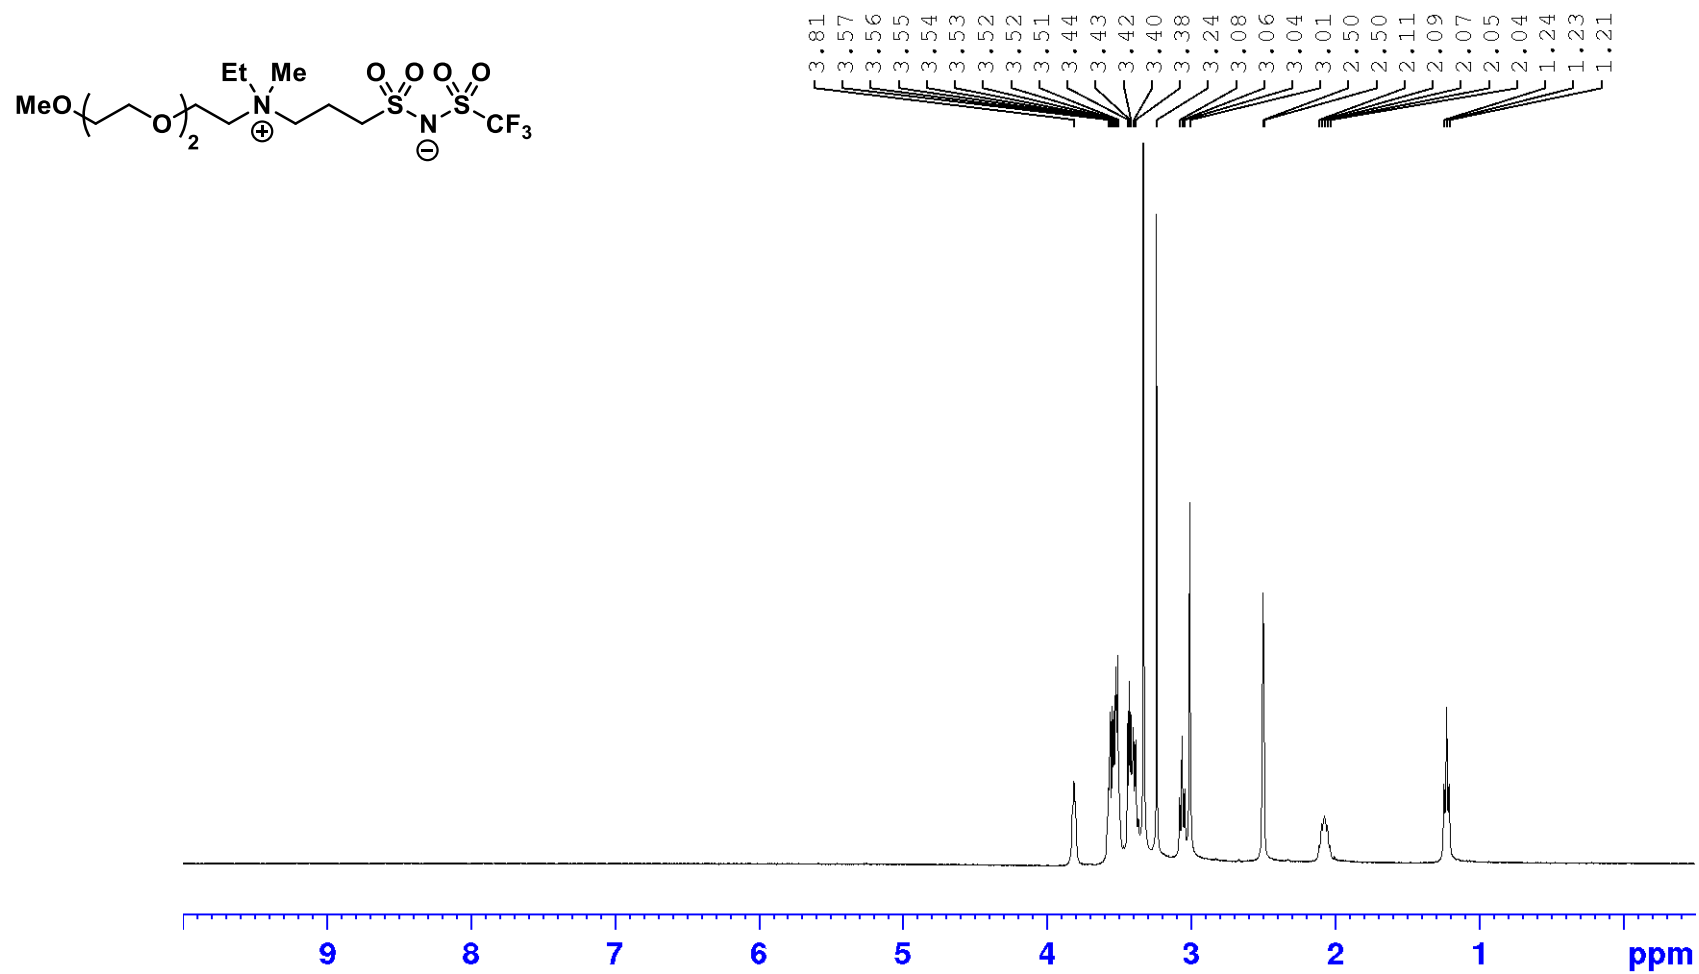

$^{19}\text{F}$  NMR spectrum of ZIL 1b

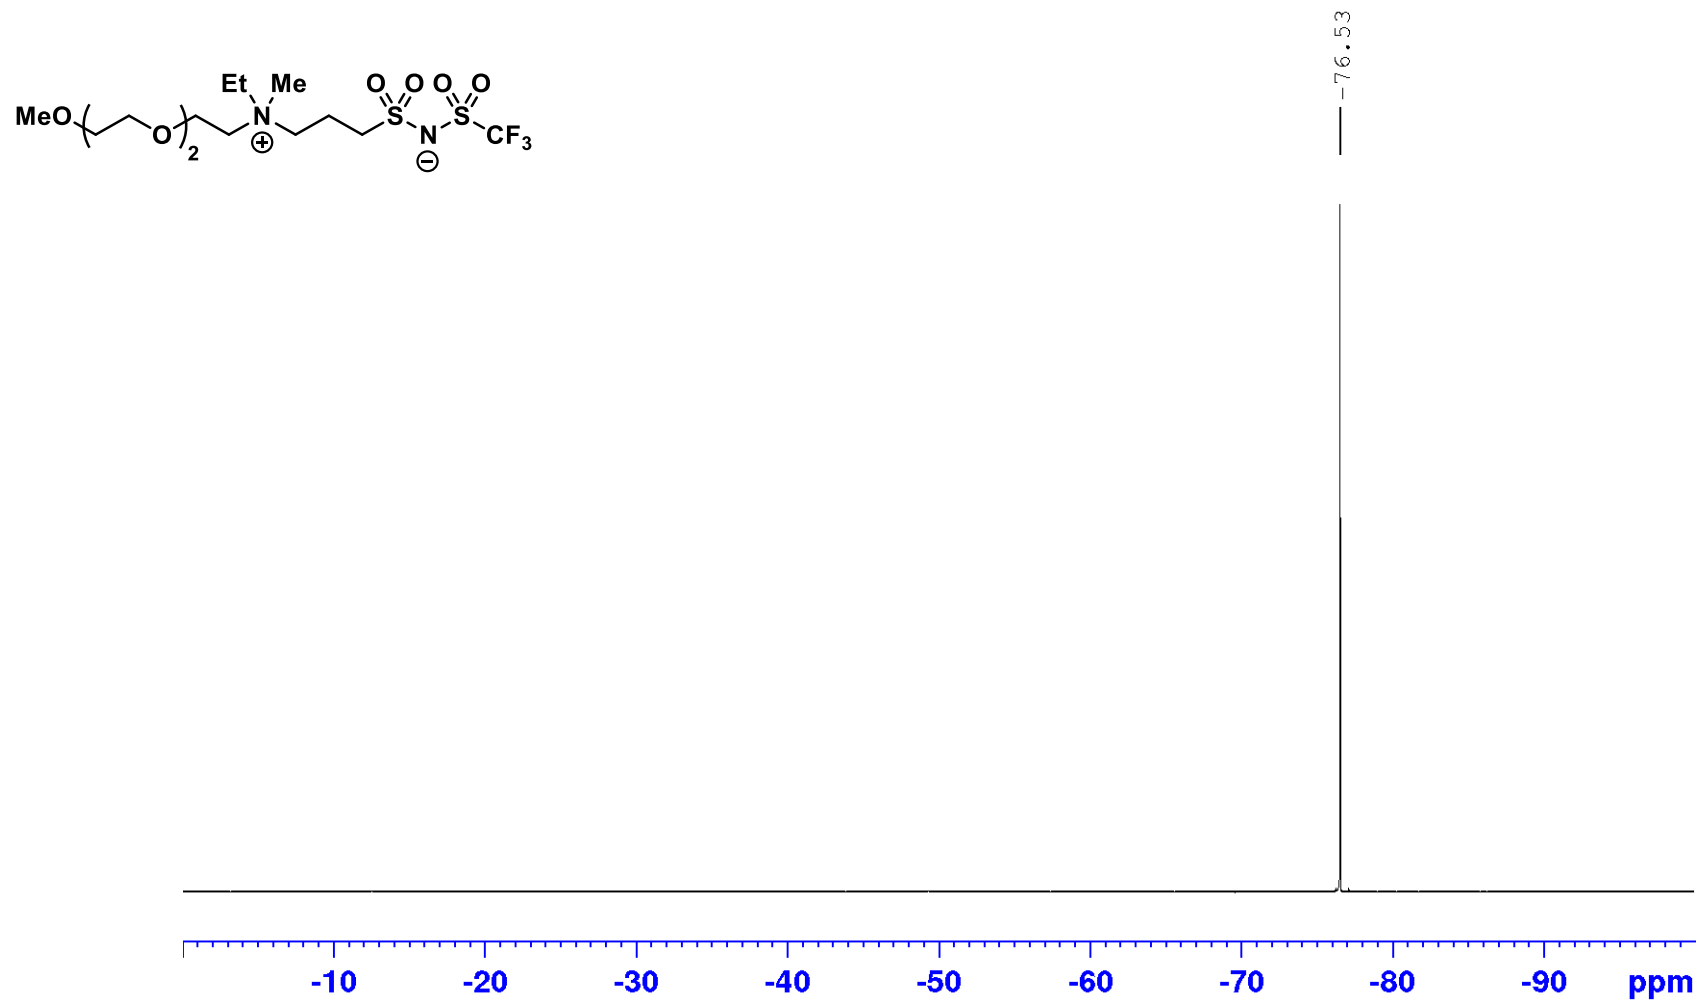

$^{13}\text{C}$  NMR spectrum of ZIL 1b

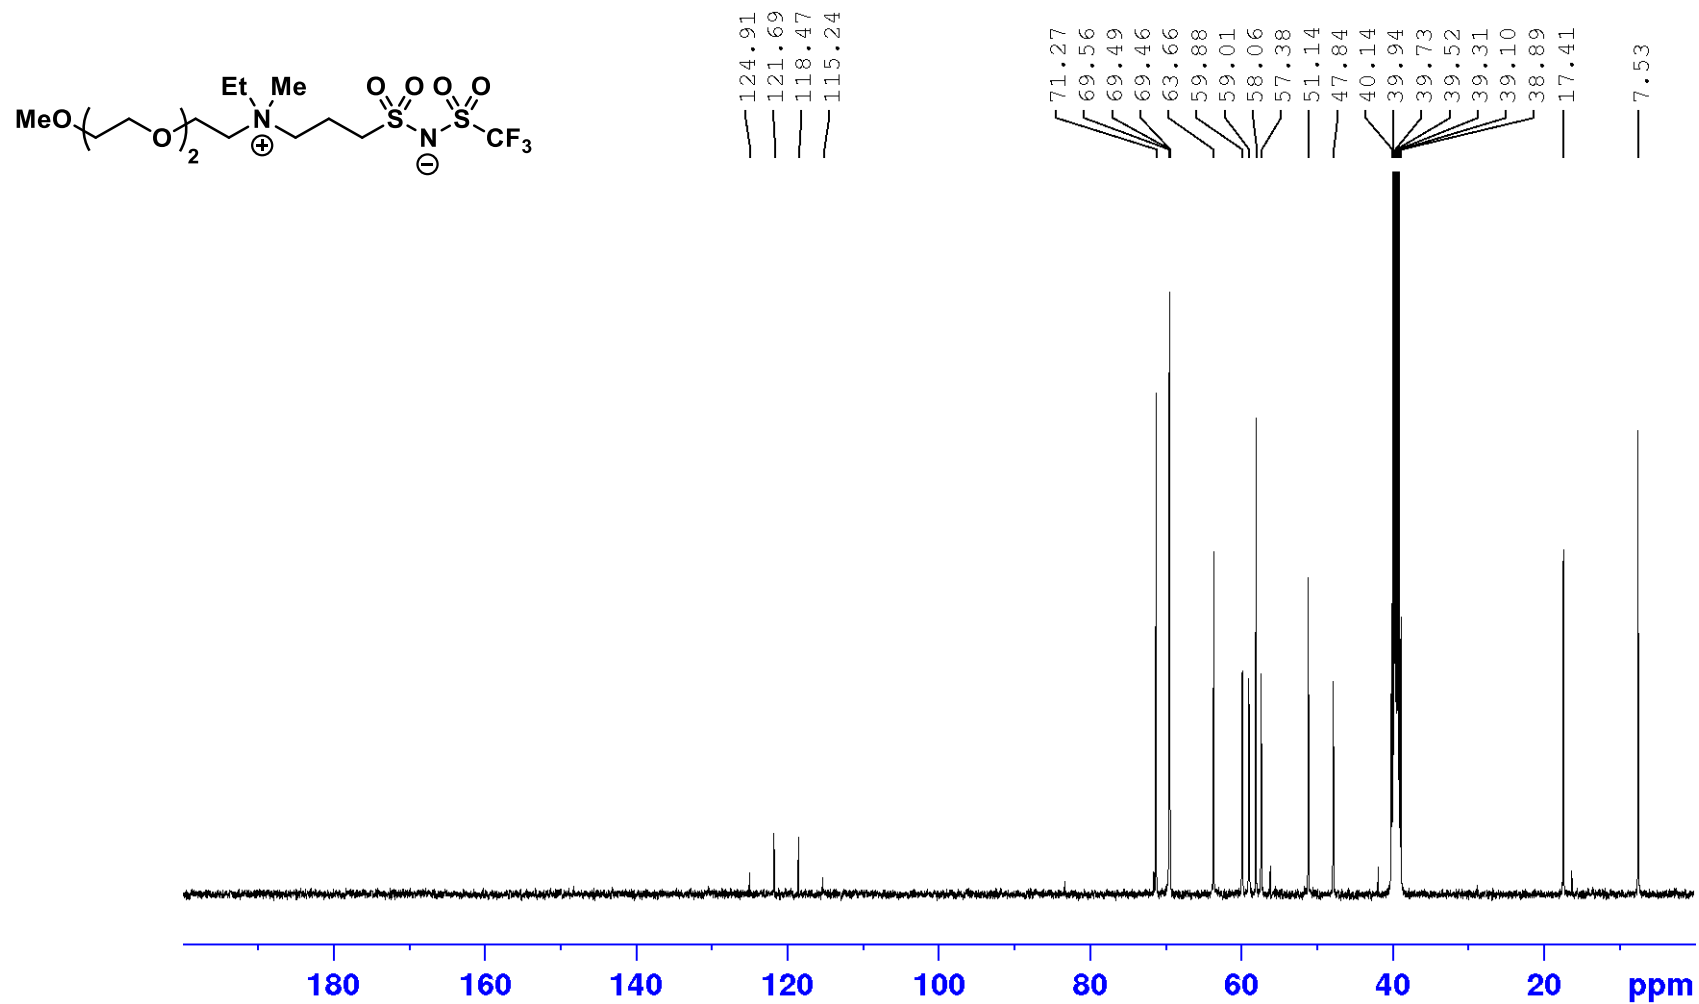

# Mass spectrum of ZIL 1b

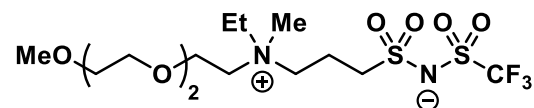

Spectrum

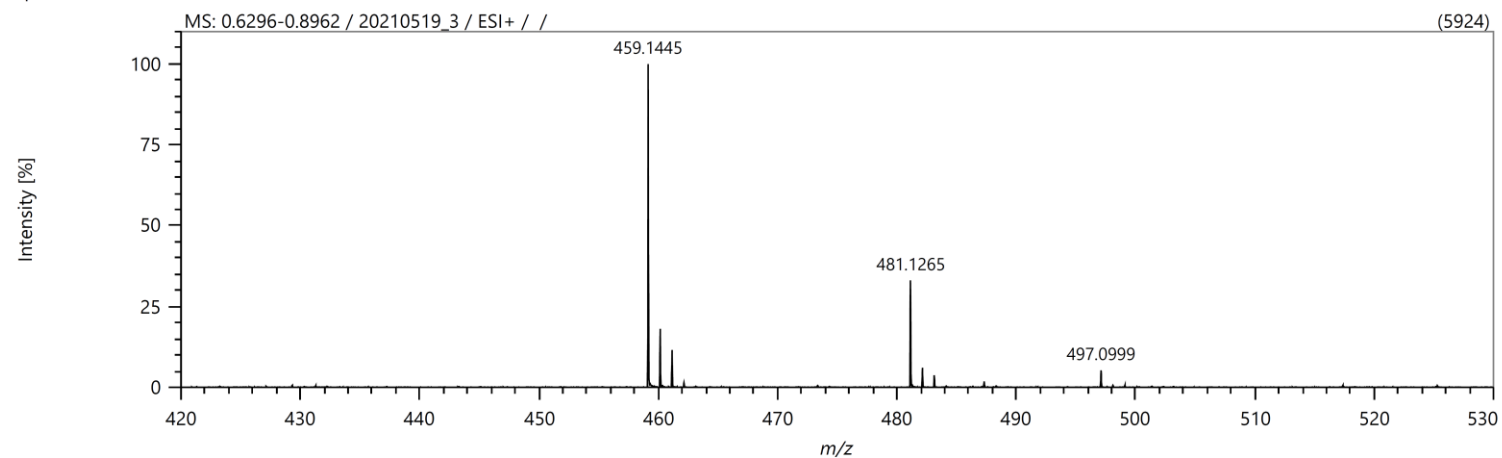

## Elemental Composition

### Parameters

Tolerance:  $\pm 2.00$  ppm  
 Electron: Odd/Even  
 Charge: +1  
 DBE: -99.0 - 999.0

### Elements Set 1:

| Symbol | C   | H    | F | N | O | S | Na | K |
|--------|-----|------|---|---|---|---|----|---|
| Min    | 0   | 0    | 3 | 2 | 7 | 2 | 0  | 0 |
| Max    | 400 | 1000 | 3 | 2 | 7 | 2 | 1  | 1 |

## Results

| Mass      | Formula                                                                                        | Calculated Mass | Mass Difference [mDa] | Mass Difference [ppm] | DBE  |
|-----------|------------------------------------------------------------------------------------------------|-----------------|-----------------------|-----------------------|------|
| 459.14446 | C <sub>14</sub> H <sub>30</sub> N <sub>2</sub> O <sub>7</sub> F <sub>3</sub> S <sub>2</sub>    | 459.14410       | 0.36                  | 0.78                  | -0.5 |
| 481.12646 | C <sub>14</sub> H <sub>29</sub> N <sub>2</sub> O <sub>7</sub> F <sub>3</sub> Na S <sub>2</sub> | 481.12605       | 0.41                  | 0.85                  | -0.5 |
| 497.09987 | C <sub>14</sub> H <sub>29</sub> N <sub>2</sub> O <sub>7</sub> F <sub>3</sub> S <sub>2</sub> K  | 497.09999       | -0.11                 | -0.23                 | -0.5 |

$^1\text{H}$  NMR spectrum of ZIL 1c

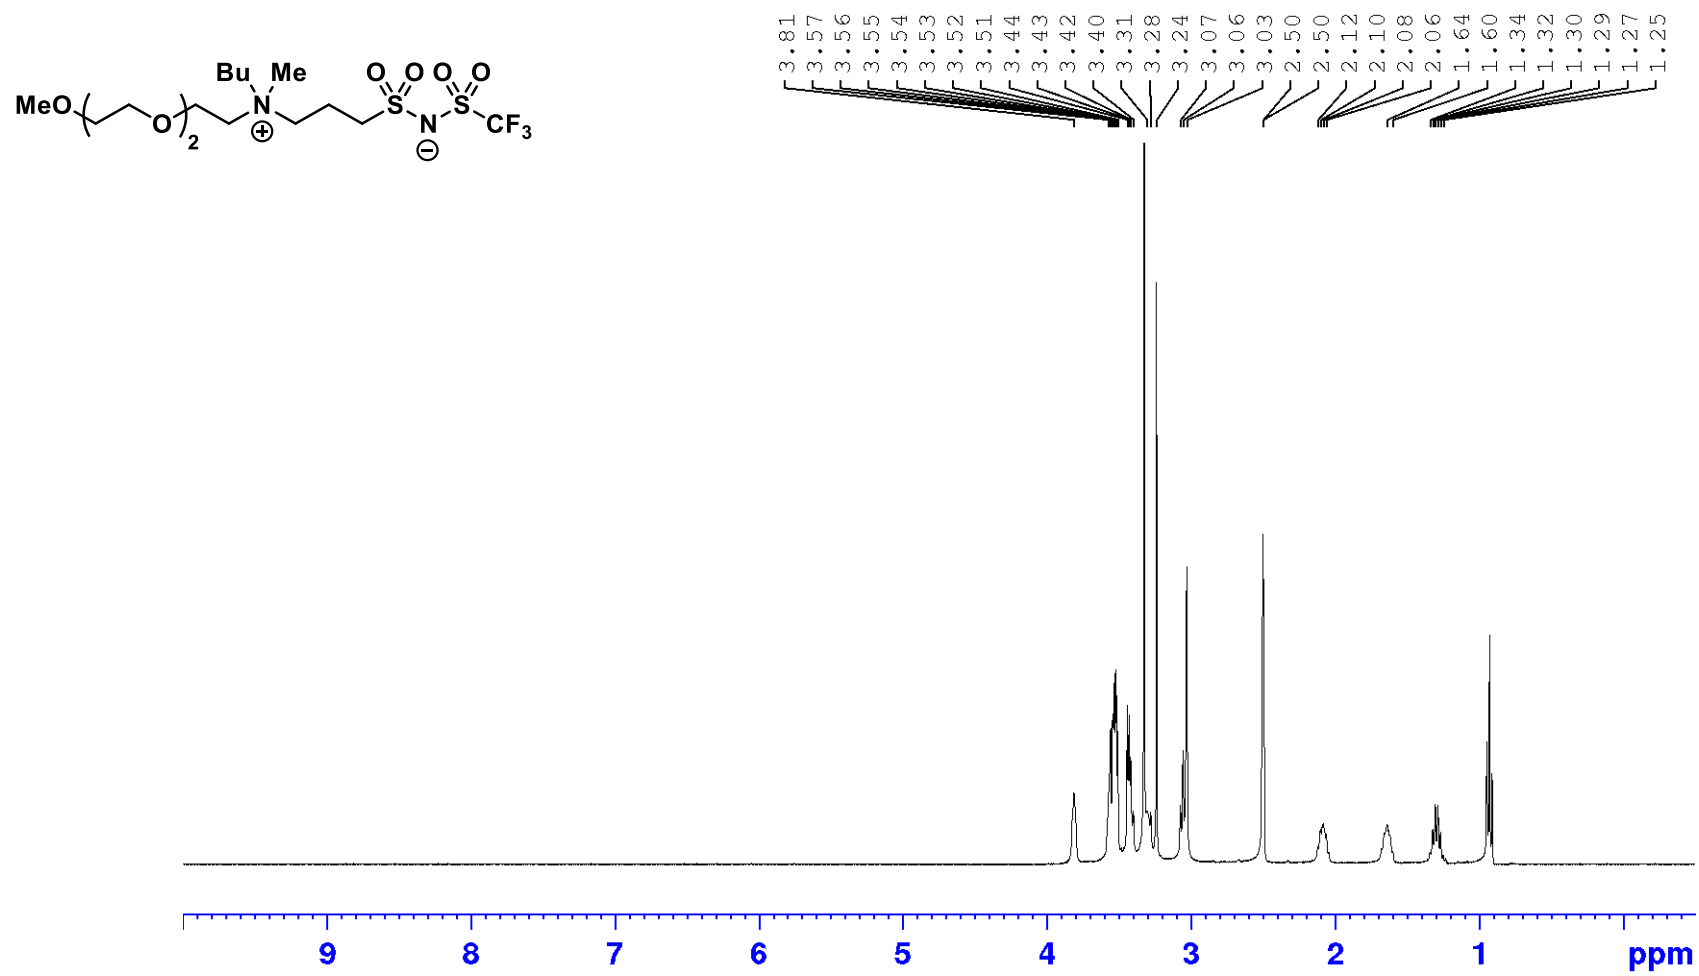

$^{19}\text{F}$  NMR spectrum of ZIL 1c

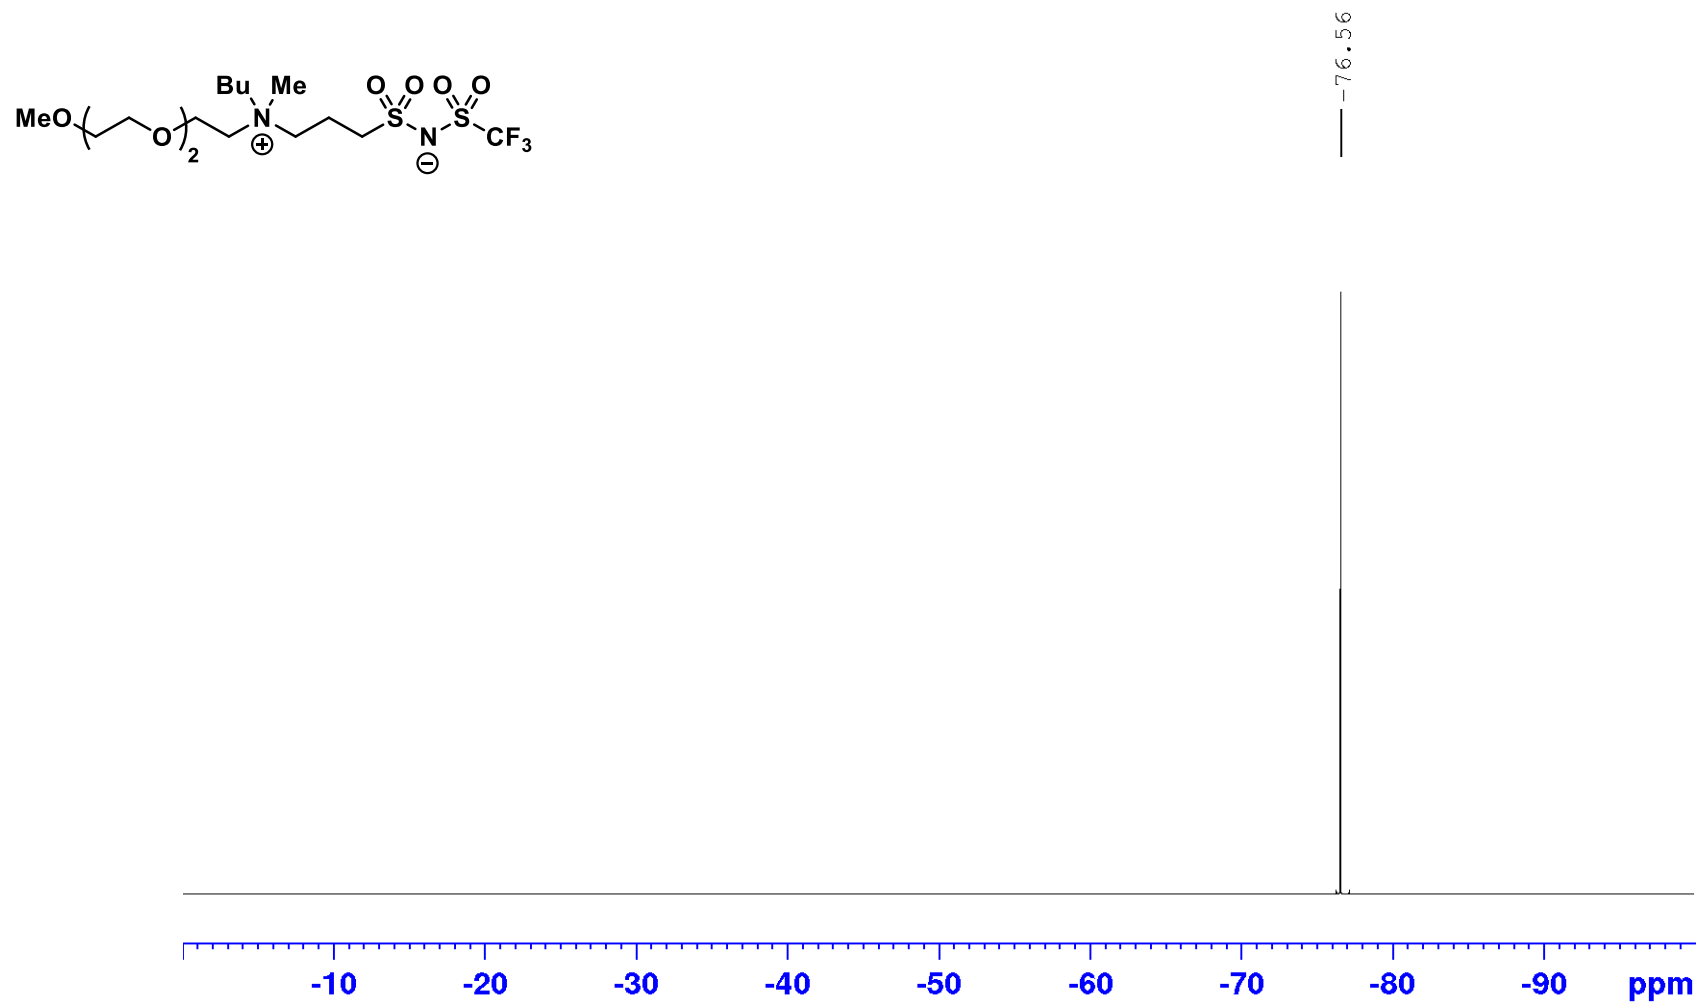



$^{13}\text{C}$  NMR spectrum of ZIL 1c

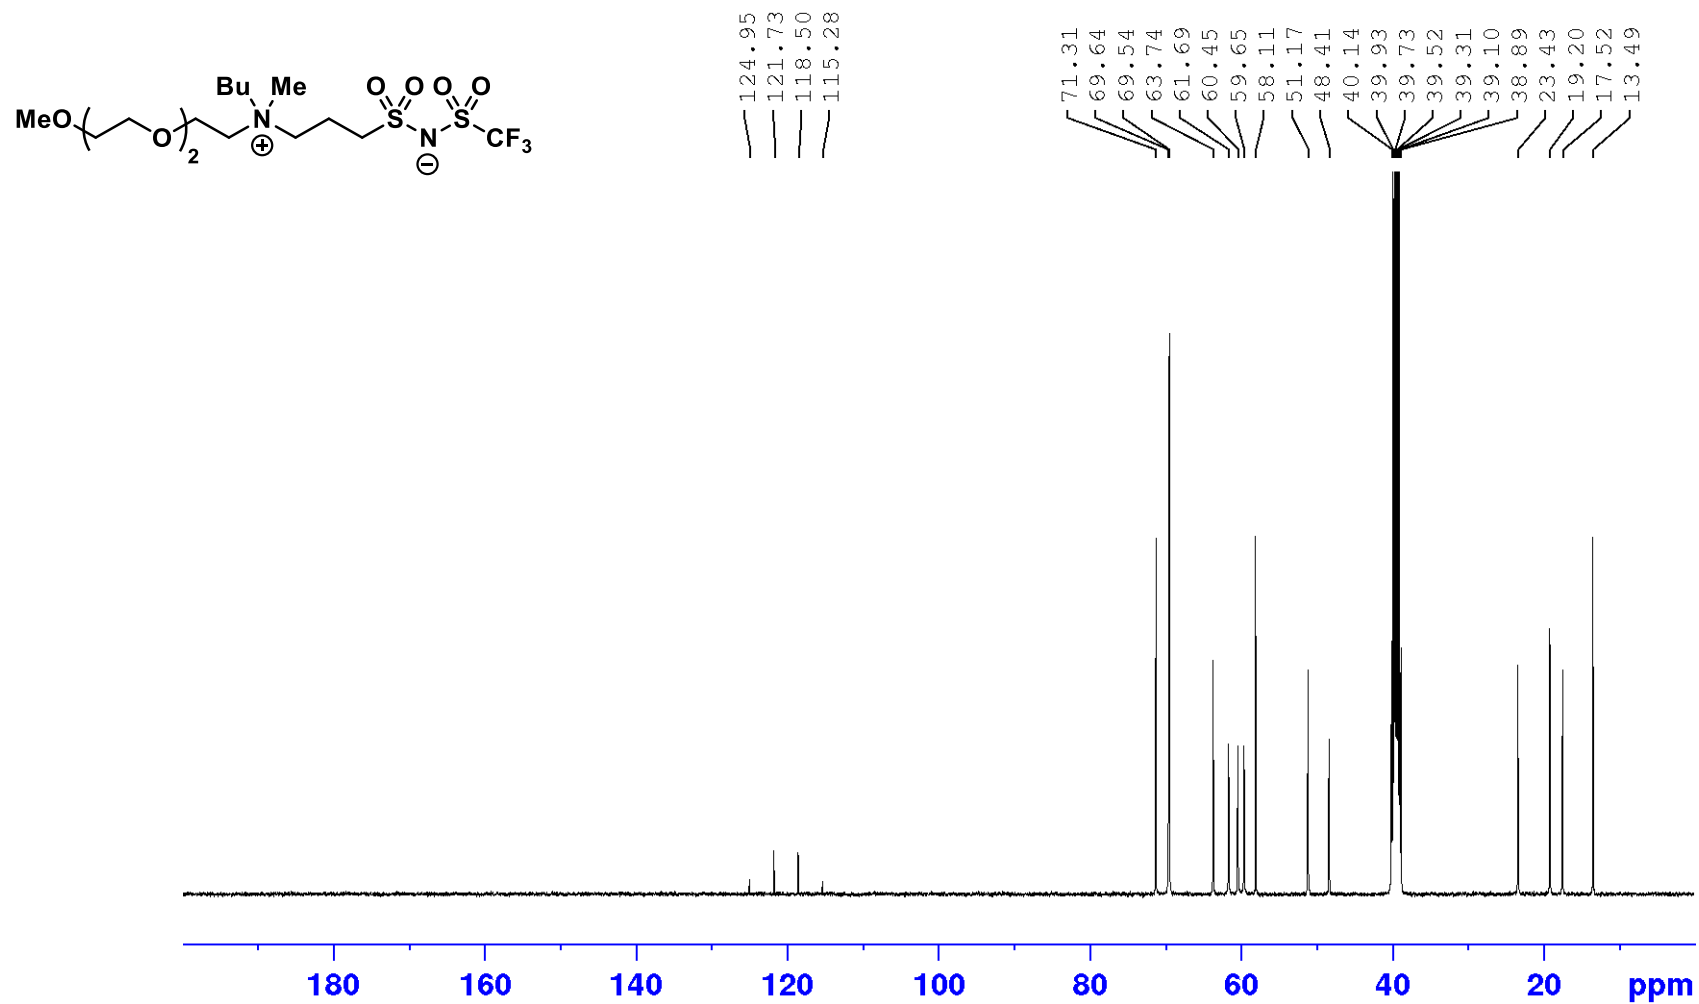

Mass spectrum of ZIL 1c

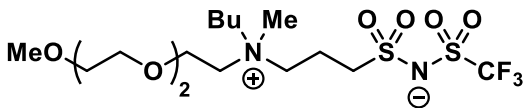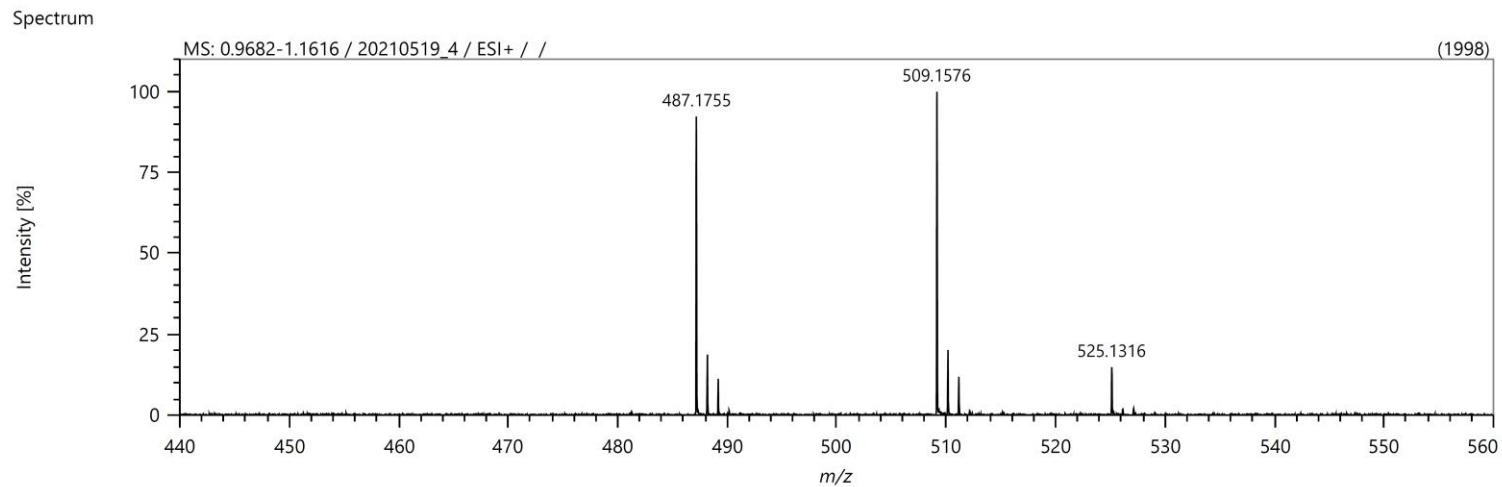

| Elemental Composition |               |                 |     |      |   |   |   |   |    |   |
|-----------------------|---------------|-----------------|-----|------|---|---|---|---|----|---|
| Parameters            |               | Elements Set 1: |     |      |   |   |   |   |    |   |
| Tolerance:            | ±2.00 ppm     | Symbol          | C   | H    | F | N | O | S | Na | K |
| Electron:             | Odd/Even      | Min             | 0   | 0    | 3 | 2 | 7 | 2 | 0  | 0 |
| Charge:               | +1            | Max             | 400 | 1000 | 3 | 2 | 7 | 2 | 1  | 1 |
| DBE:                  | -99.0 - 999.0 |                 |     |      |   |   |   |   |    |   |

| Results   |                        |                 |                       |                       |      |
|-----------|------------------------|-----------------|-----------------------|-----------------------|------|
| Mass      | Formula                | Calculated Mass | Mass Difference [mDa] | Mass Difference [ppm] | DBE  |
| 487.17552 | C16 H34 N2 O7 F3 S2    | 487.17540       | 0.12                  | 0.25                  | -0.5 |
| 509.15760 | C16 H33 N2 O7 F3 Na S2 | 509.15735       | 0.25                  | 0.50                  | -0.5 |
| 525.13164 | C16 H33 N2 O7 F3 S2 K  | 525.13129       | 0.36                  | 0.68                  | -0.5 |

$^1\text{H}$  NMR spectrum of ZIL 1d

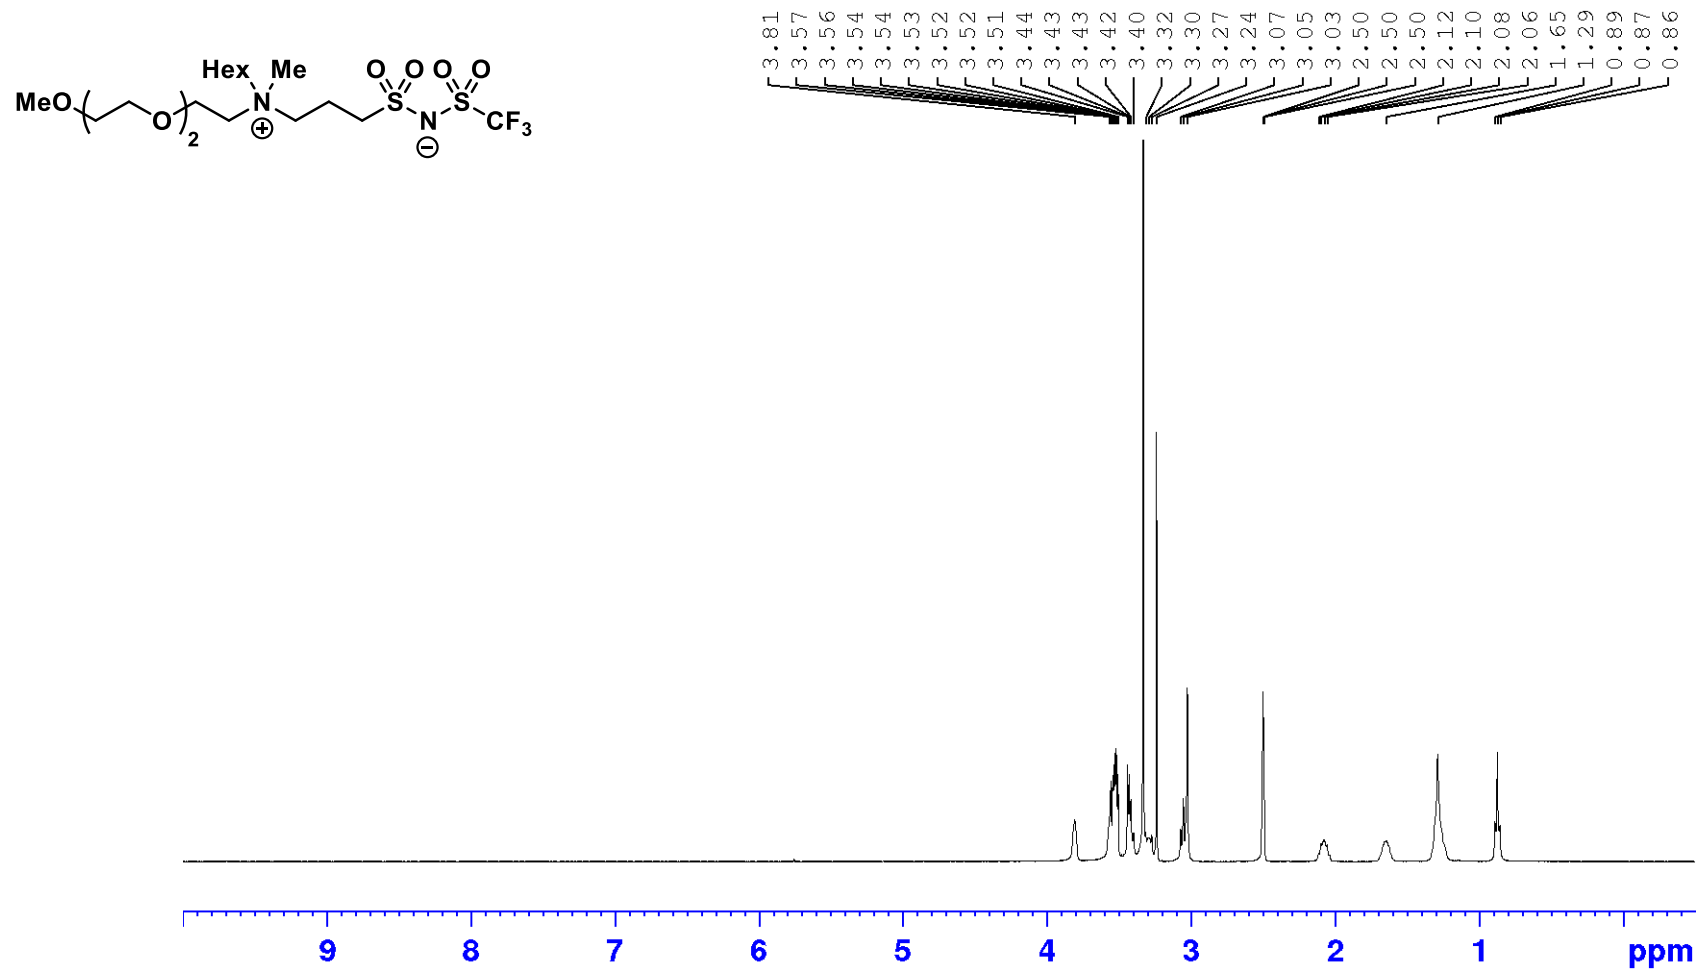

$^{19}\text{F}$  NMR spectrum of ZIL 1d

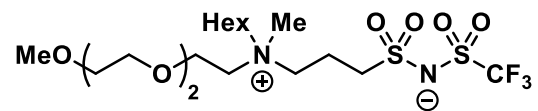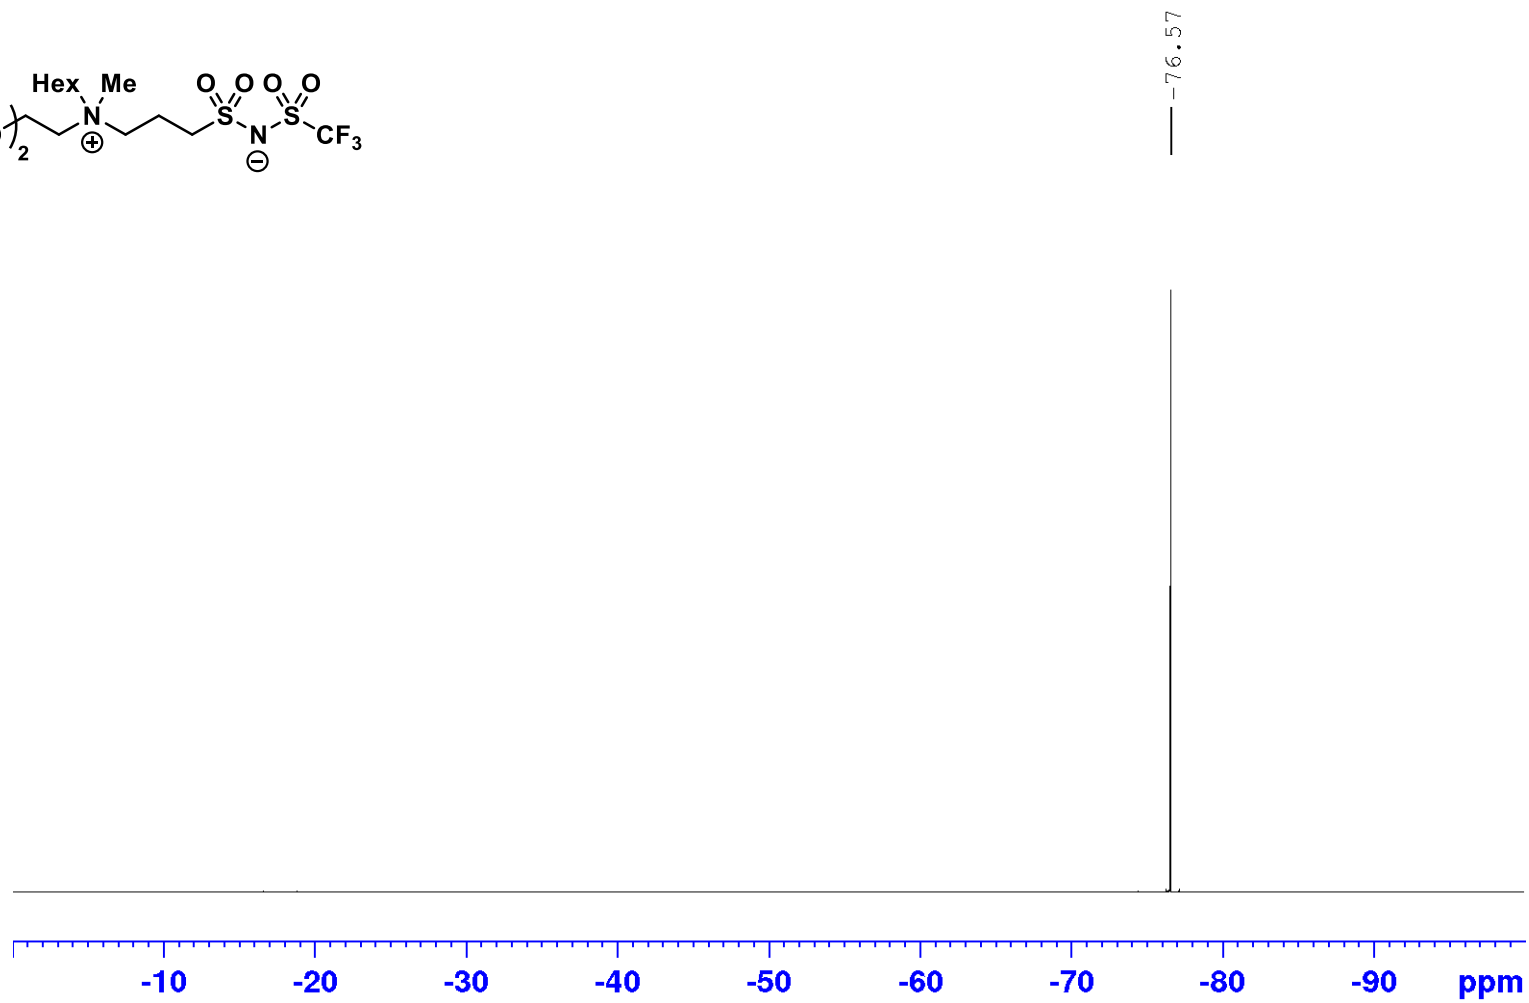

$^{13}\text{C}$  NMR spectrum of ZIL 1d

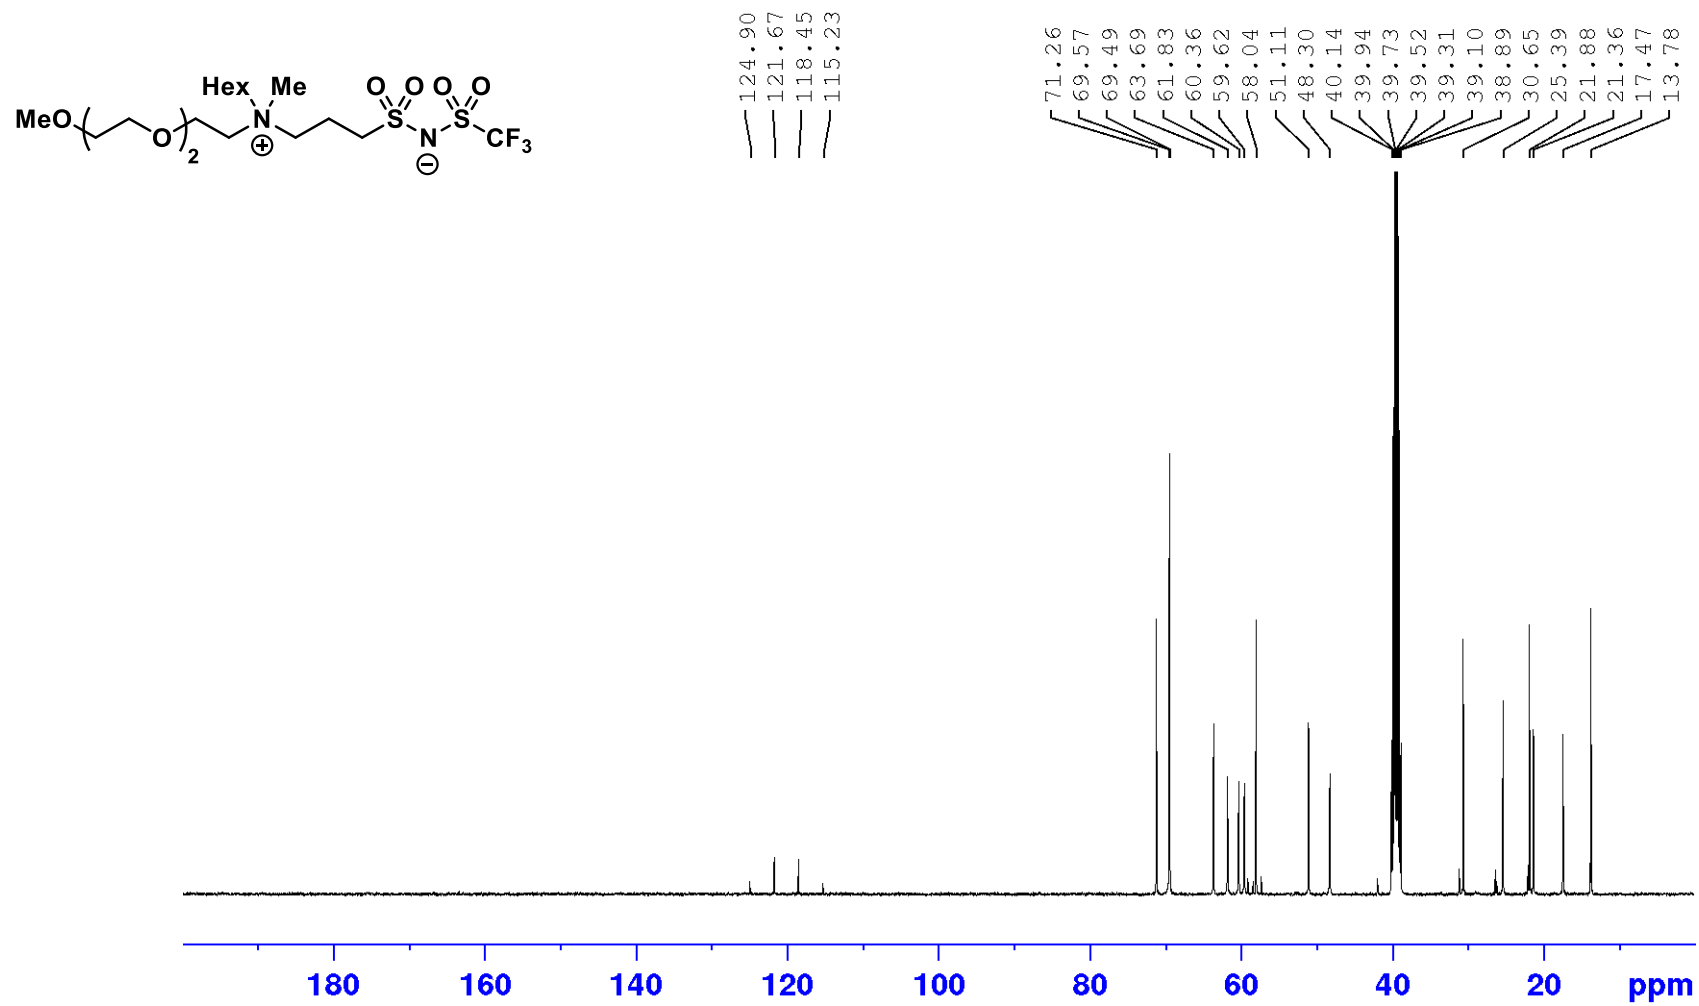

# Mass spectrum of ZIL 1d

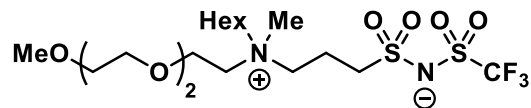

Spectrum

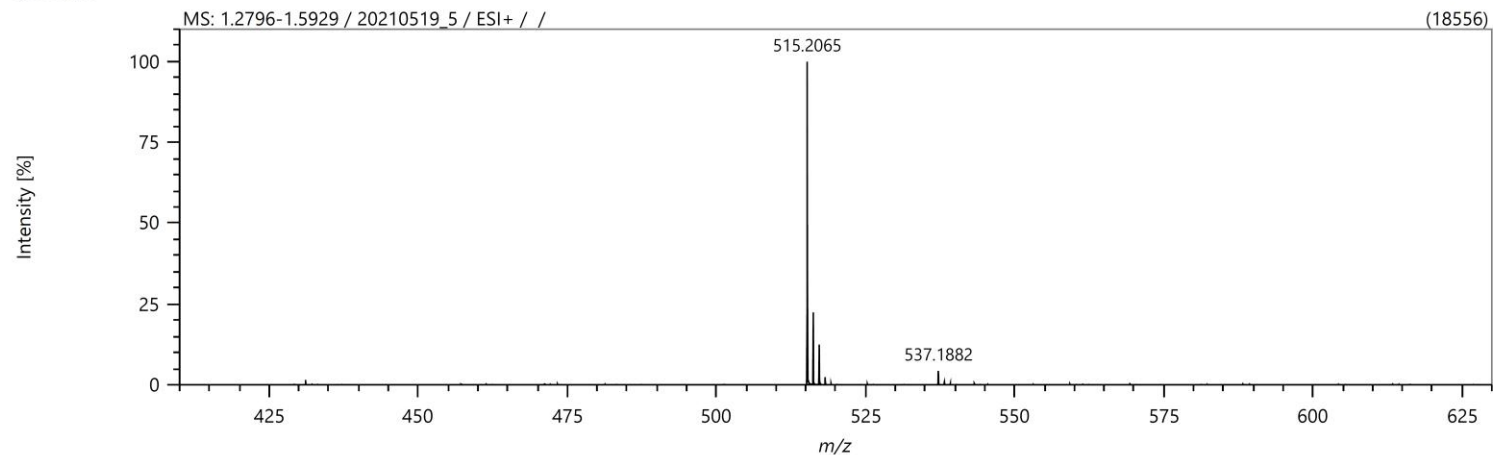

## Elemental Composition

### Parameters

Tolerance:  $\pm 2.00$  ppm  
 Electron: Odd/Even  
 Charge: +1  
 DBE: -99.0 - 999.0

### Elements Set 1:

| Symbol | C   | H    | F | N | O | S | Na |
|--------|-----|------|---|---|---|---|----|
| Min    | 0   | 0    | 3 | 2 | 7 | 2 | 0  |
| Max    | 400 | 1000 | 3 | 2 | 8 | 2 | 1  |

## Results

| Mass      | Formula                                                                                       | Calculated Mass | Mass Difference [mDa] | Mass Difference [ppm] | DBE  |
|-----------|-----------------------------------------------------------------------------------------------|-----------------|-----------------------|-----------------------|------|
| 515.20645 | C <sub>18</sub> H <sub>38</sub> N <sub>2</sub> O <sub>7</sub> F <sub>3</sub> S <sub>2</sub>   | 515.20670       | -0.25                 | -0.49                 | -0.5 |
| 537.18818 | C <sub>18</sub> H <sub>37</sub> N <sub>2</sub> O <sub>7</sub> F <sub>3</sub> NaS <sub>2</sub> | 537.18865       | -0.46                 | -0.86                 | -0.5 |

$^1\text{H}$  NMR spectrum of ZIL 1e

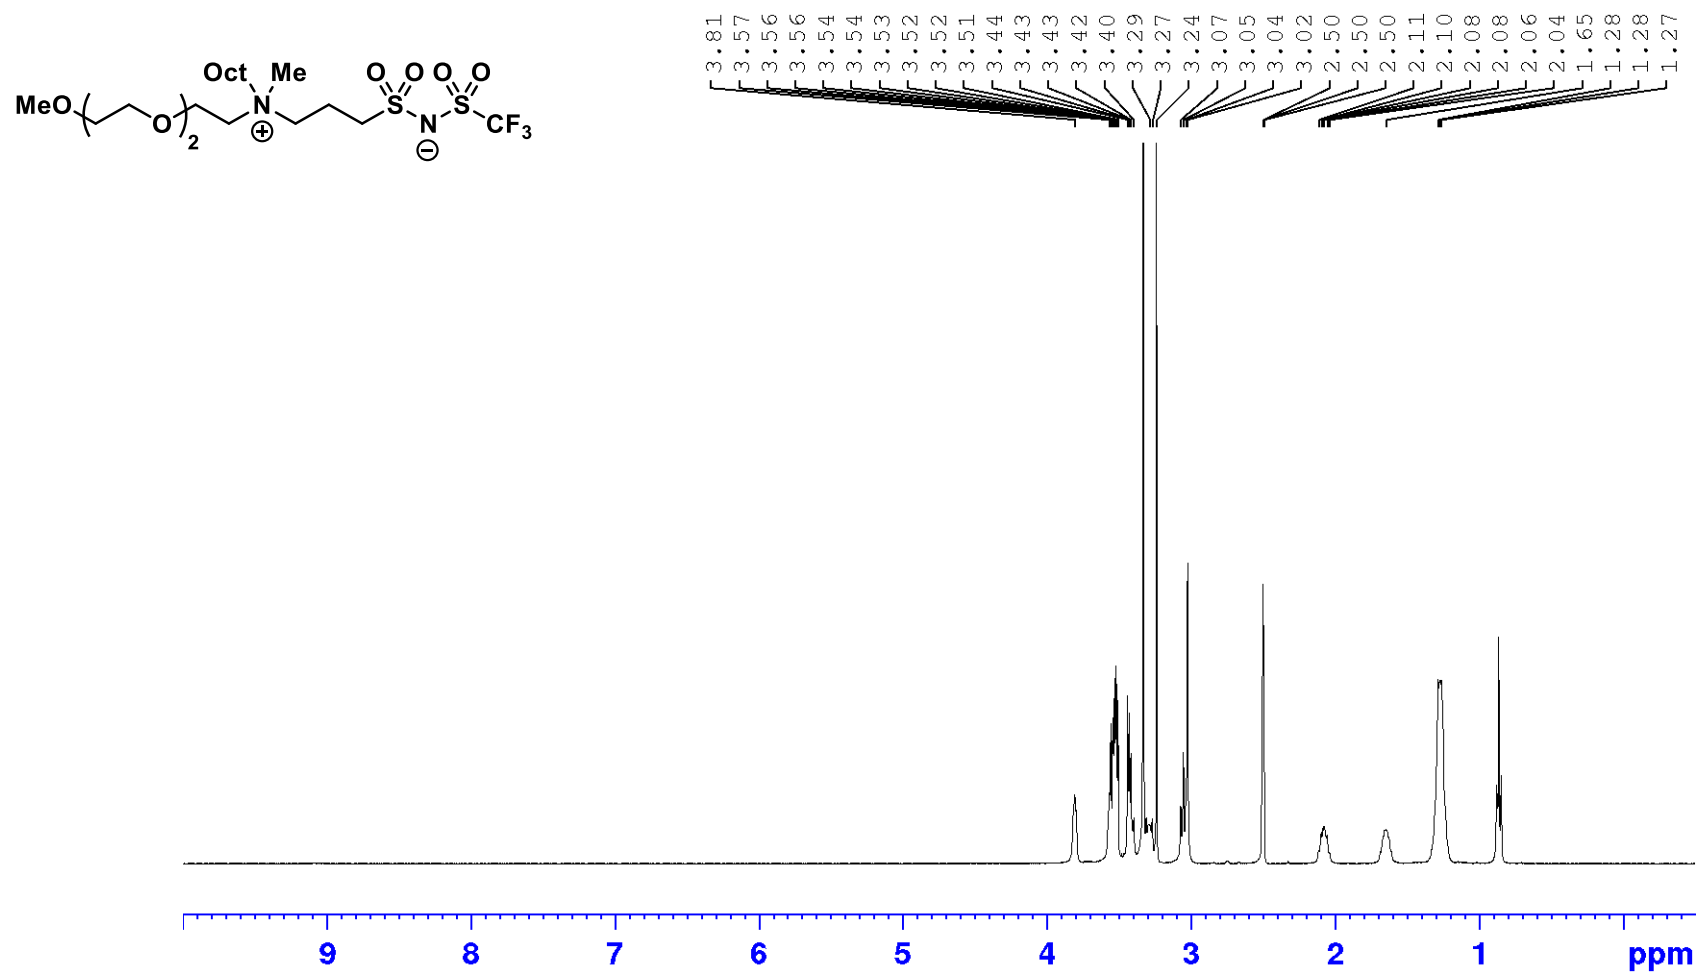

$^{19}\text{F}$  NMR spectrum of ZIL 1e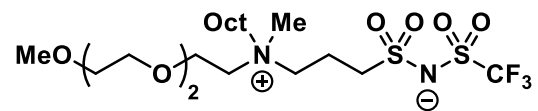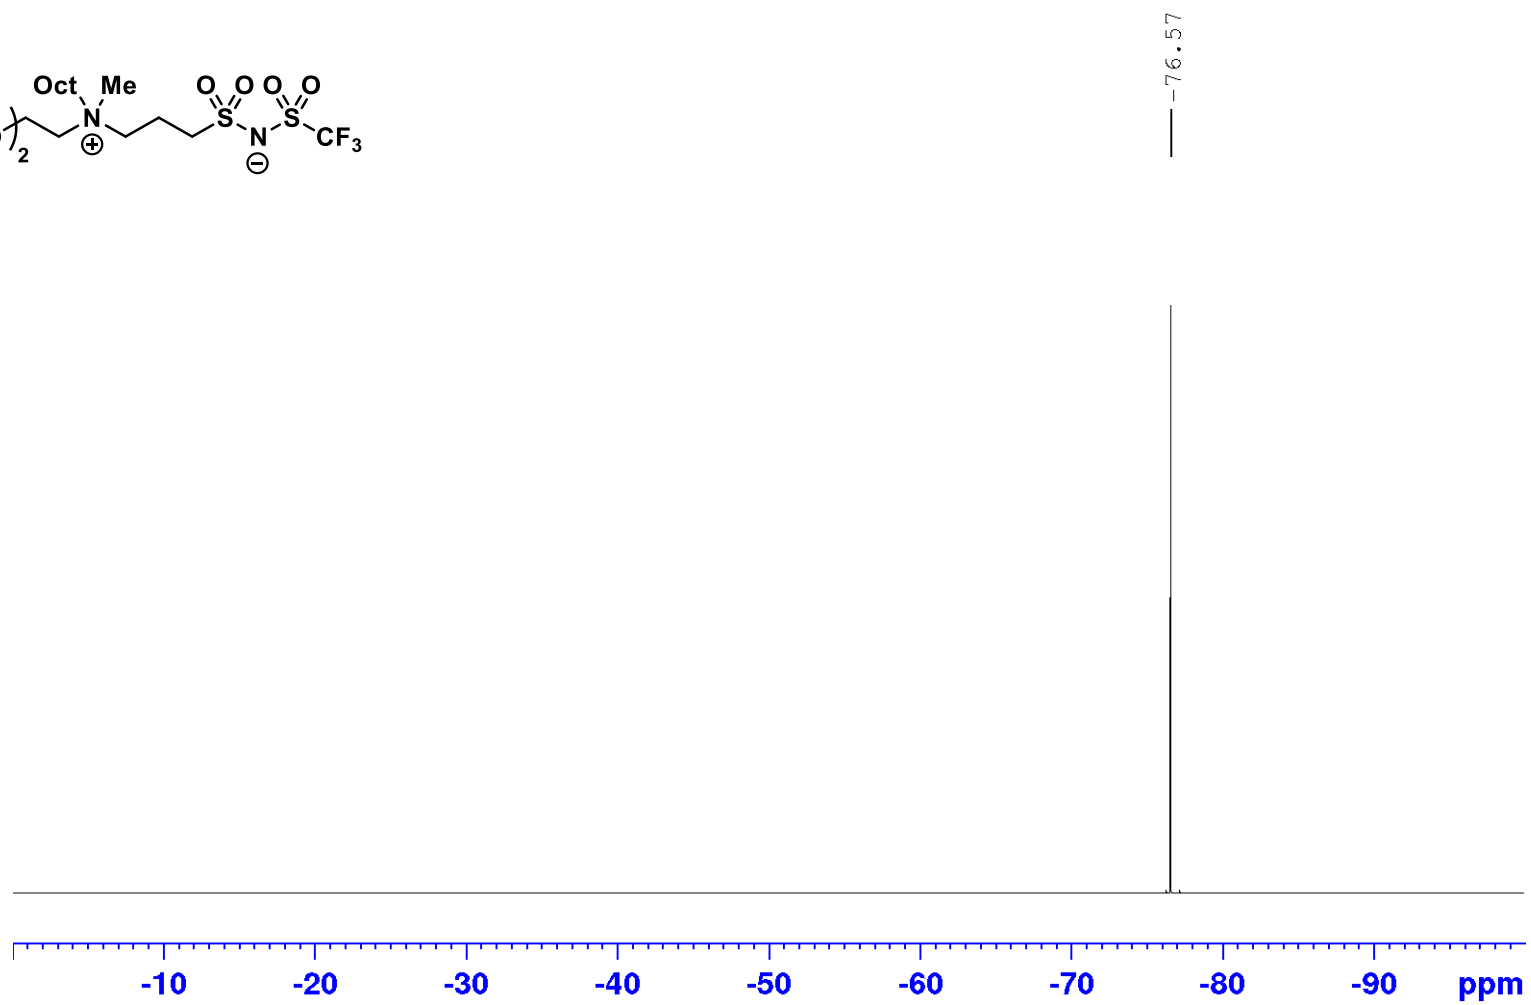



$^{13}\text{C}$  NMR spectrum of ZIL 1e

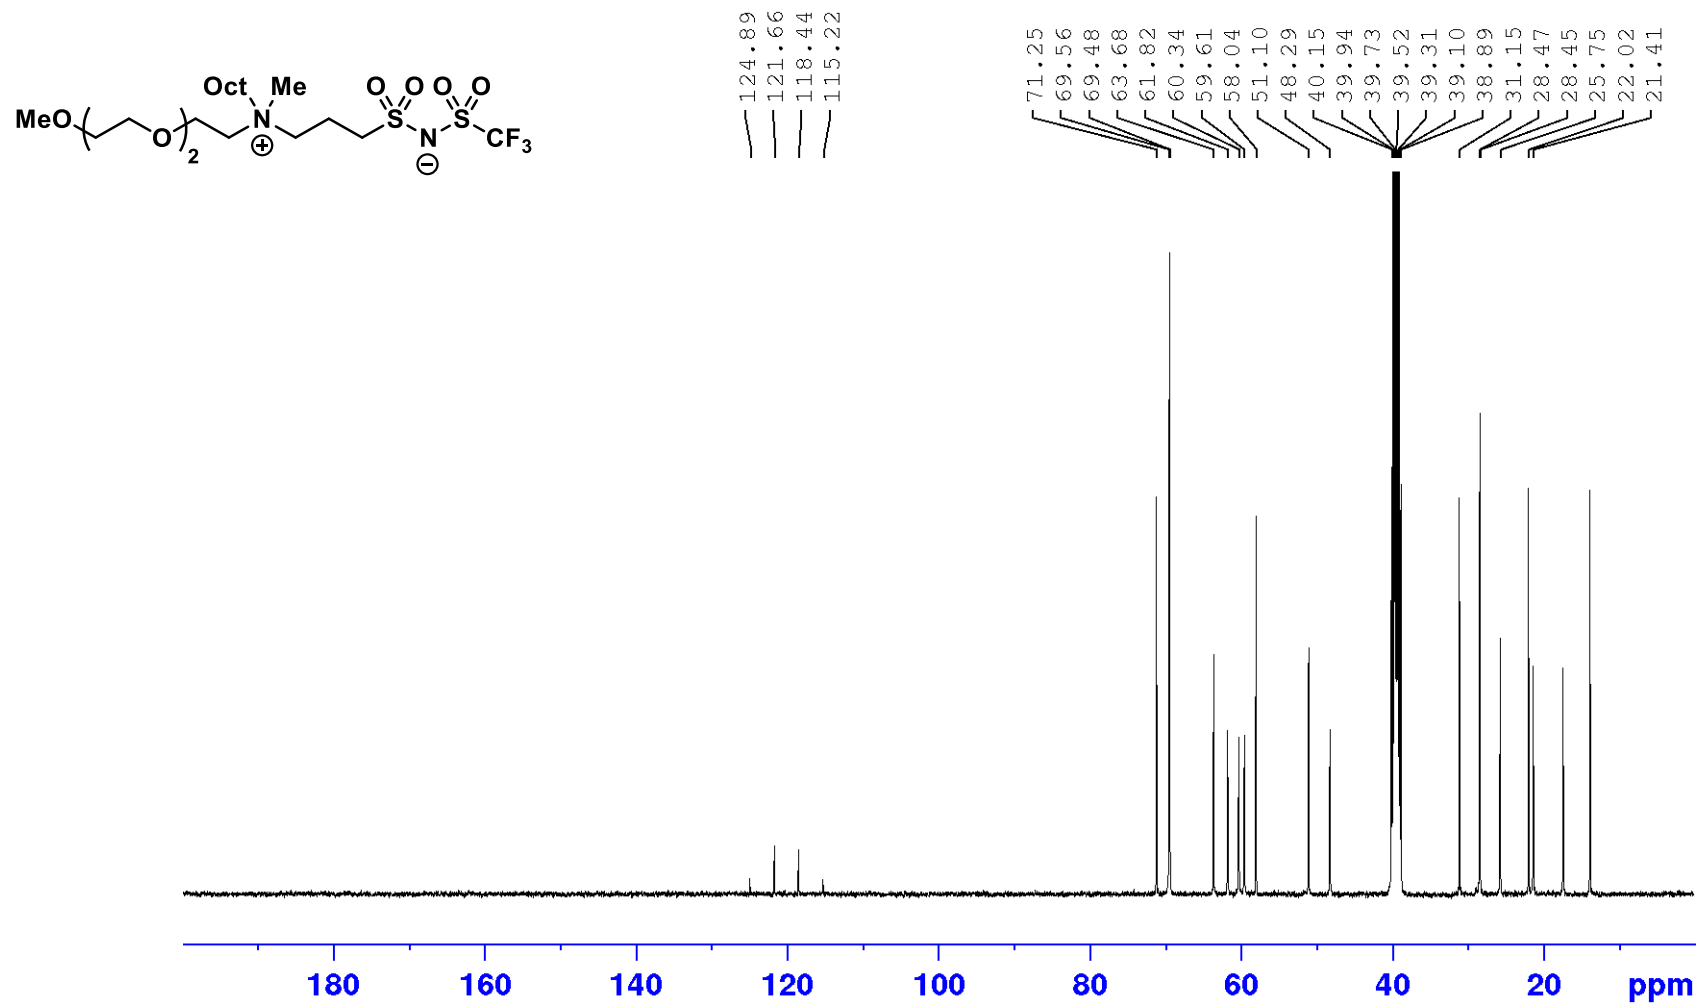

Mass spectrum of ZIL 1e

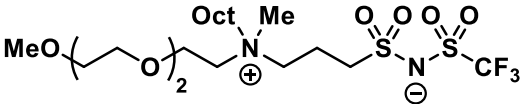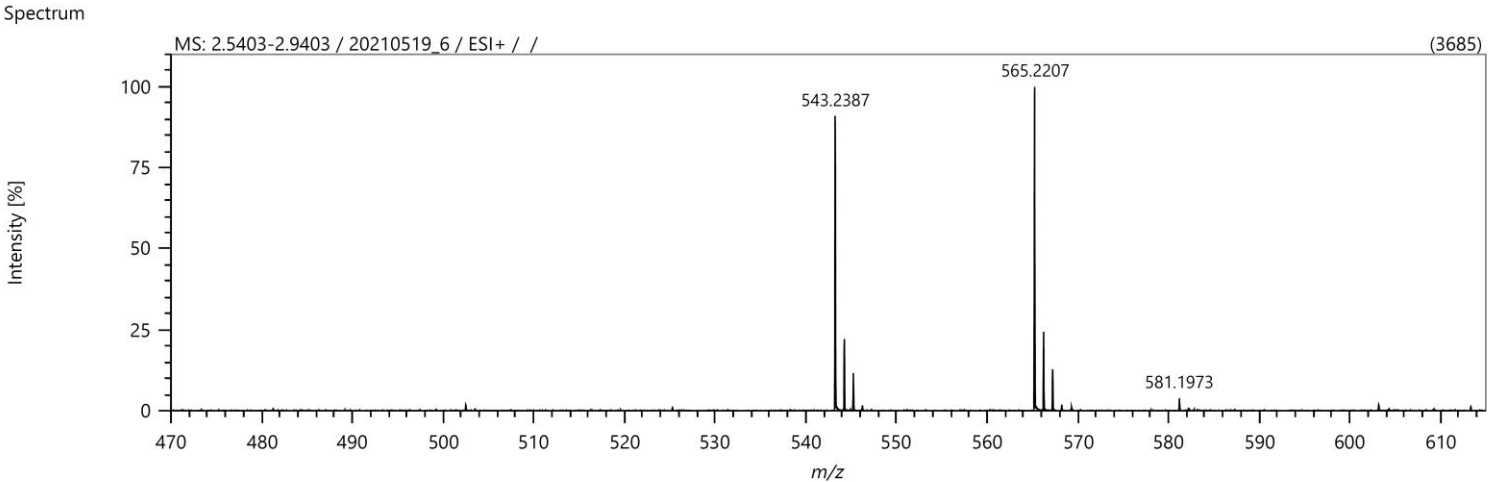

| Elemental Composition |               | Elements Set 1: |     |      |   |   |   |   |    |
|-----------------------|---------------|-----------------|-----|------|---|---|---|---|----|
| Parameters            |               | Symbol          | C   | H    | F | N | O | S | Na |
| Tolerance:            | ±2.00 ppm     | Min             | 0   | 0    | 3 | 2 | 7 | 2 | 0  |
| Electron:             | Odd/Even      | Max             | 400 | 1000 | 3 | 2 | 8 | 2 | 1  |
| Charge:               | +1            |                 |     |      |   |   |   |   |    |
| DBE:                  | -99.0 - 999.0 |                 |     |      |   |   |   |   |    |

| Results   |                        | Calculated | Mass       | Mass       | DBE  |
|-----------|------------------------|------------|------------|------------|------|
| Mass      | Formula                | Mass       | Difference | Difference |      |
|           |                        |            | [mDa]      | [ppm]      |      |
| 543.23867 | C20 H42 N2 O7 F3 S2    | 543.23800  | 0.66       | 1.22       | -0.5 |
| 565.22065 | C20 H41 N2 O7 F3 Na S2 | 565.21995  | 0.70       | 1.24       | -0.5 |

$^1\text{H}$  NMR spectrum of ZIL 2a

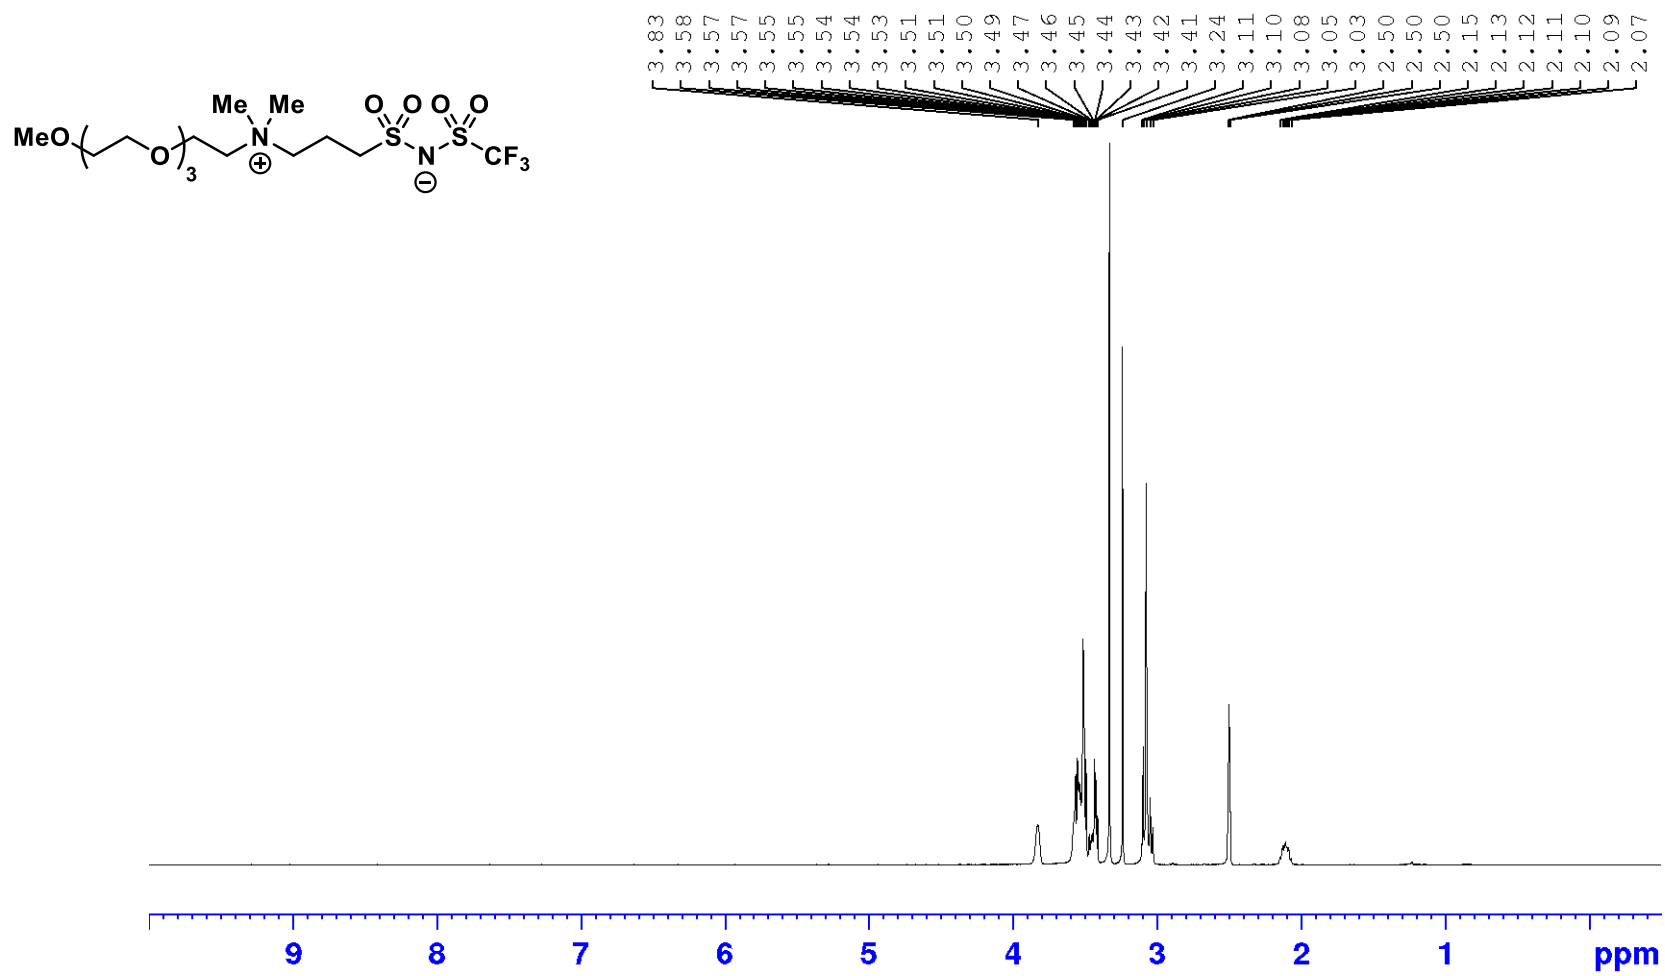

$^{19}\text{F}$  NMR spectrum of ZIL 2a

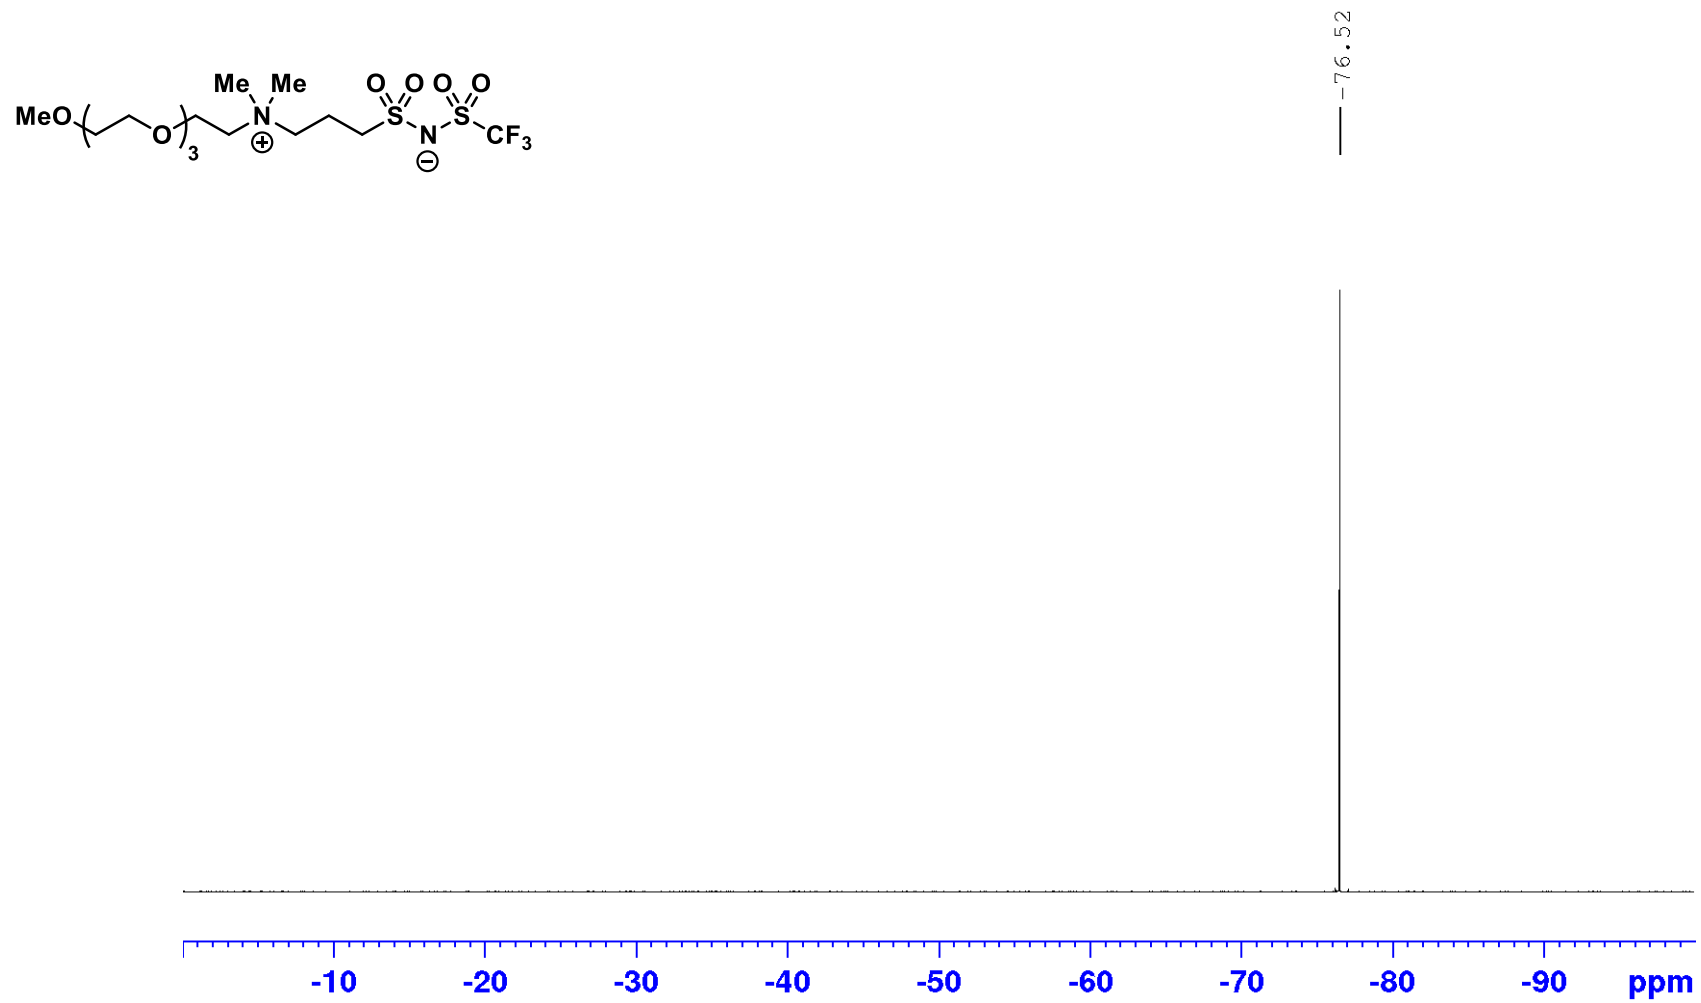

$^{13}\text{C}$  NMR spectrum of ZIL 2a

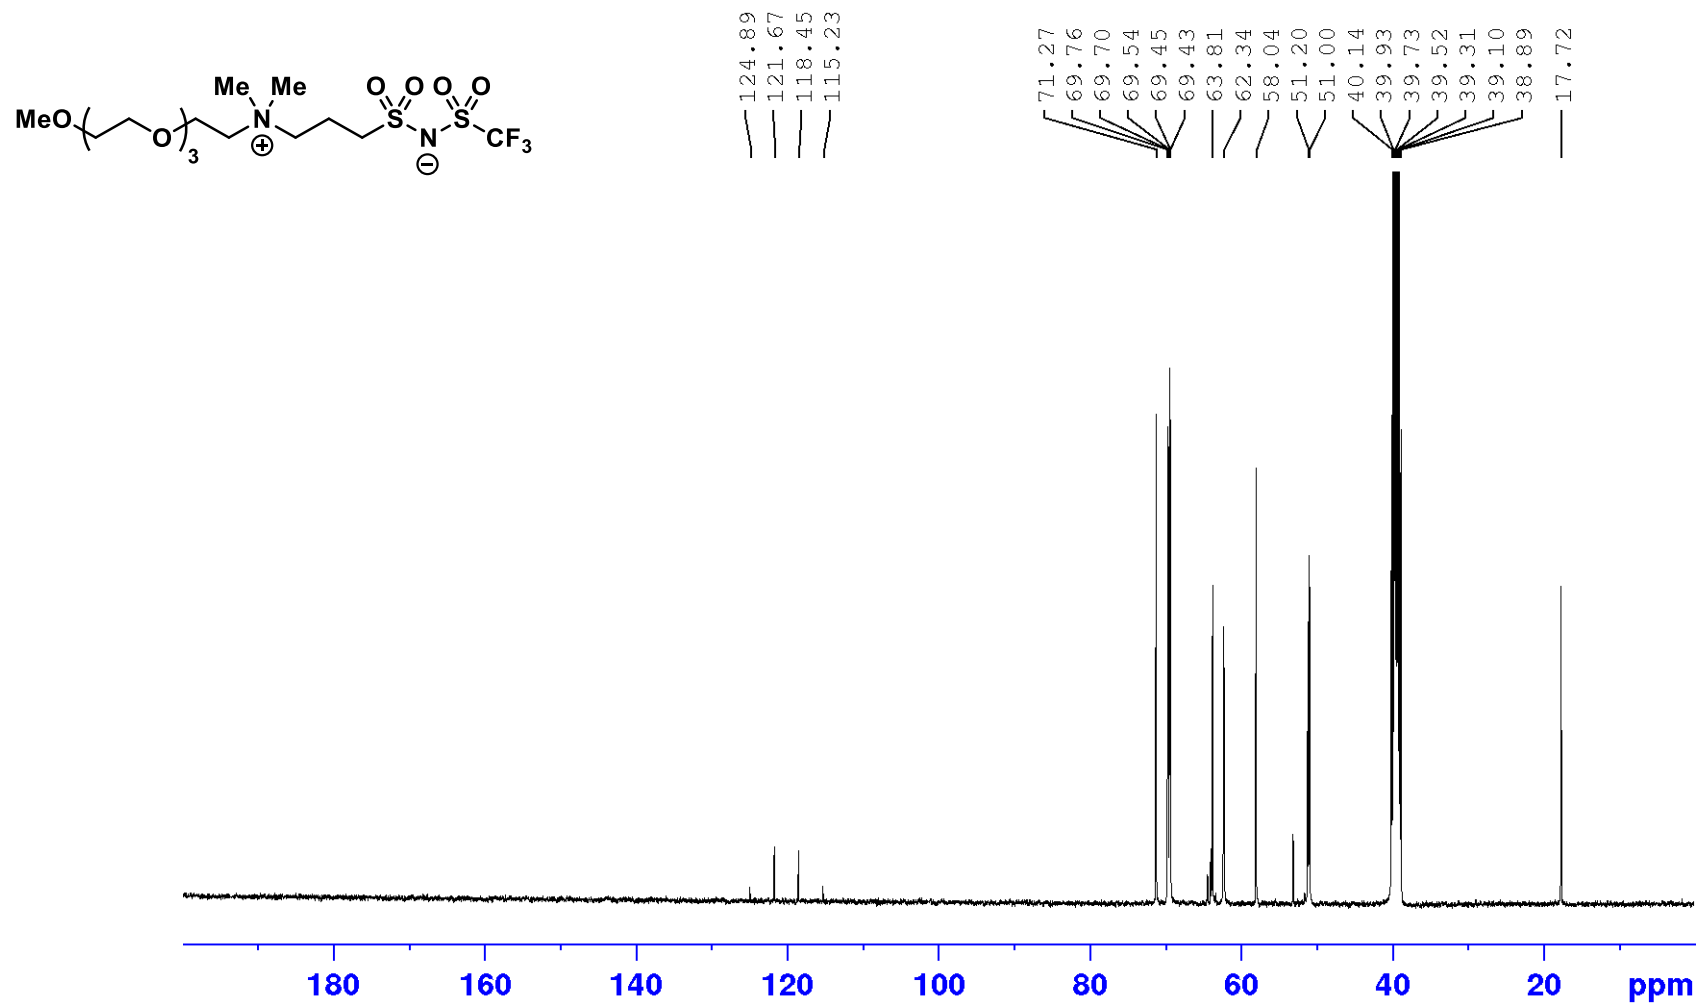

# Mass spectrum of ZIL 2a

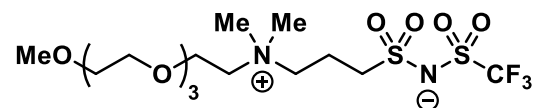

Spectrum

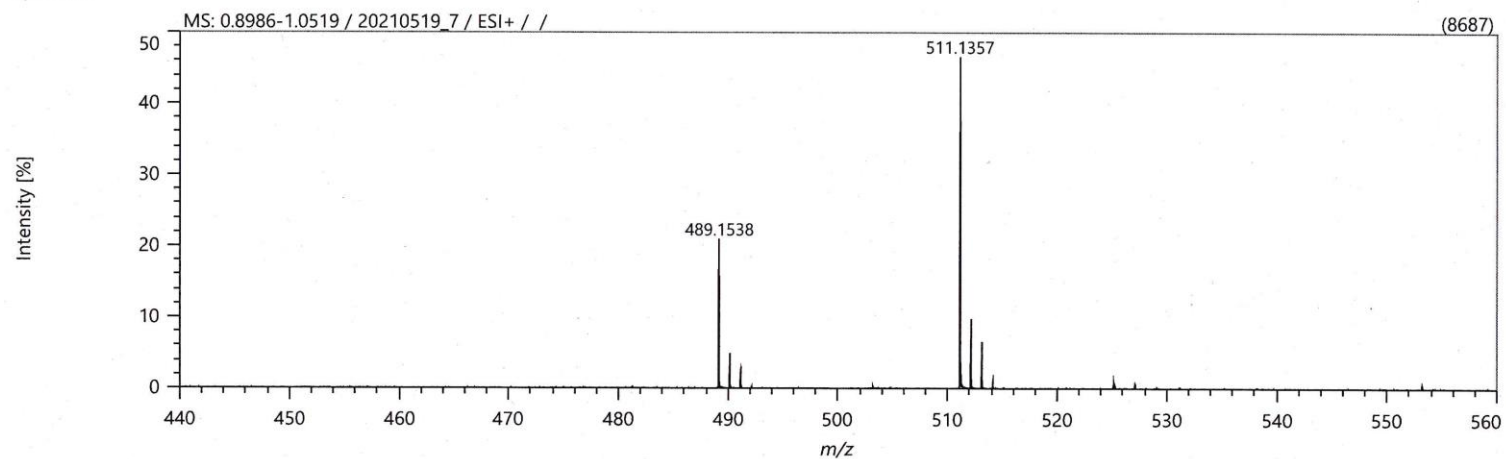

## Elemental Composition

### Parameters

Tolerance:  $\pm 2.00$  ppm  
 Electron: Odd/Even  
 Charge: +1  
 DBE: -99.0 - 999.0

### Elements Set 1:

| Symbol | C   | H    | F | N | O | S | Na |
|--------|-----|------|---|---|---|---|----|
| Min    | 0   | 0    | 3 | 2 | 8 | 2 | 0  |
| Max    | 400 | 1000 | 3 | 2 | 8 | 2 | 1  |

## Results

| Mass      | Formula                                                                                        | Calculated Mass | Mass Difference [mDa] | Mass Difference [ppm] | DBE  |
|-----------|------------------------------------------------------------------------------------------------|-----------------|-----------------------|-----------------------|------|
| 489.15385 | C <sub>15</sub> H <sub>32</sub> N <sub>2</sub> O <sub>8</sub> F <sub>3</sub> S <sub>2</sub>    | 489.15467       | -0.82                 | -1.68                 | -0.5 |
| 511.13571 | C <sub>15</sub> H <sub>31</sub> N <sub>2</sub> O <sub>8</sub> F <sub>3</sub> Na S <sub>2</sub> | 511.13661       | -0.90                 | -1.76                 | -0.5 |

$^1\text{H}$  NMR spectrum of ZIL 2b

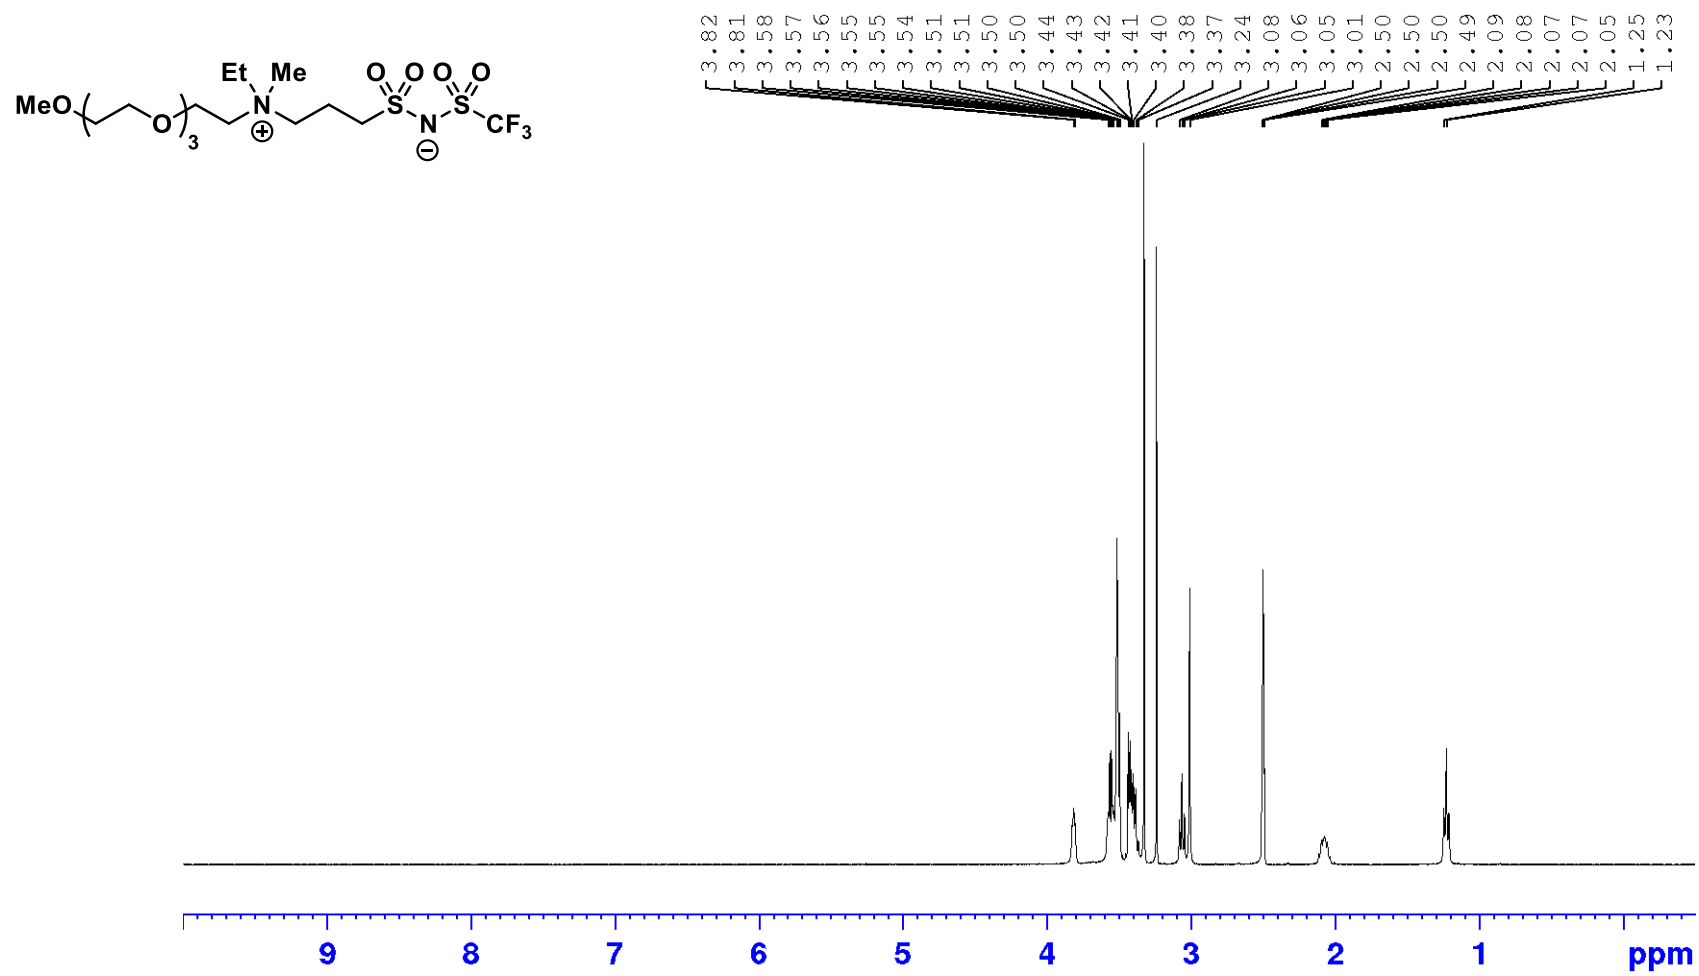

$^{19}\text{F}$  NMR spectrum of ZIL 2b

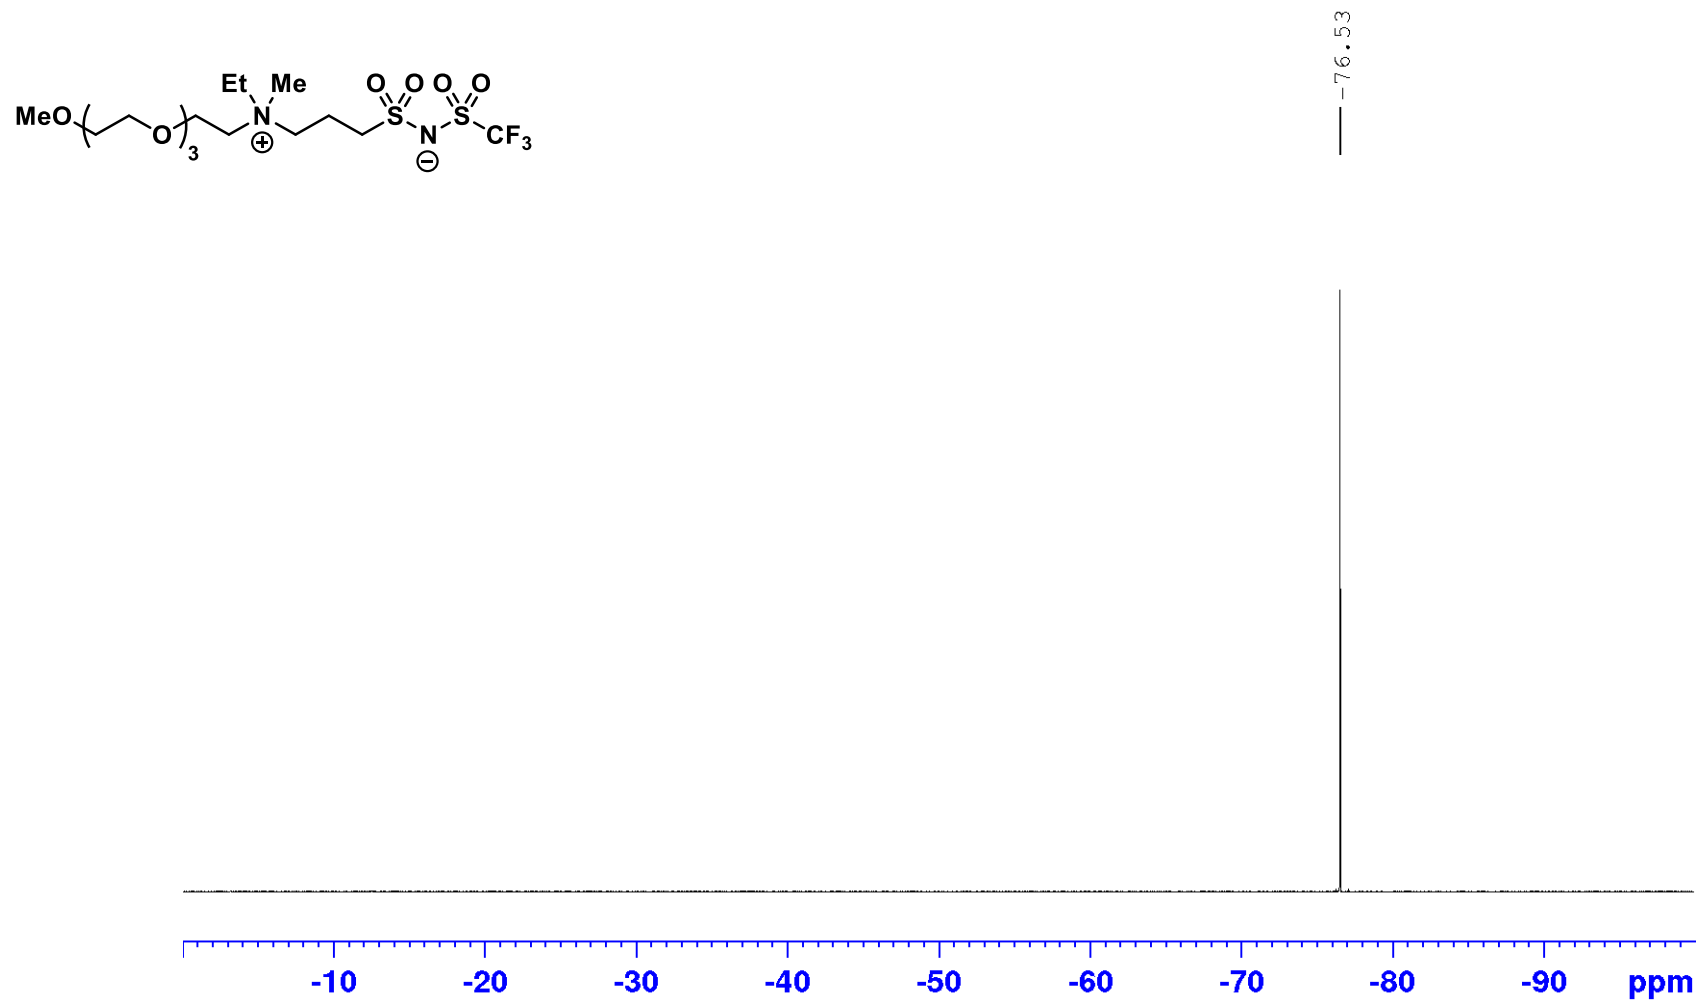



$^{13}\text{C}$  NMR spectrum of ZIL 2b

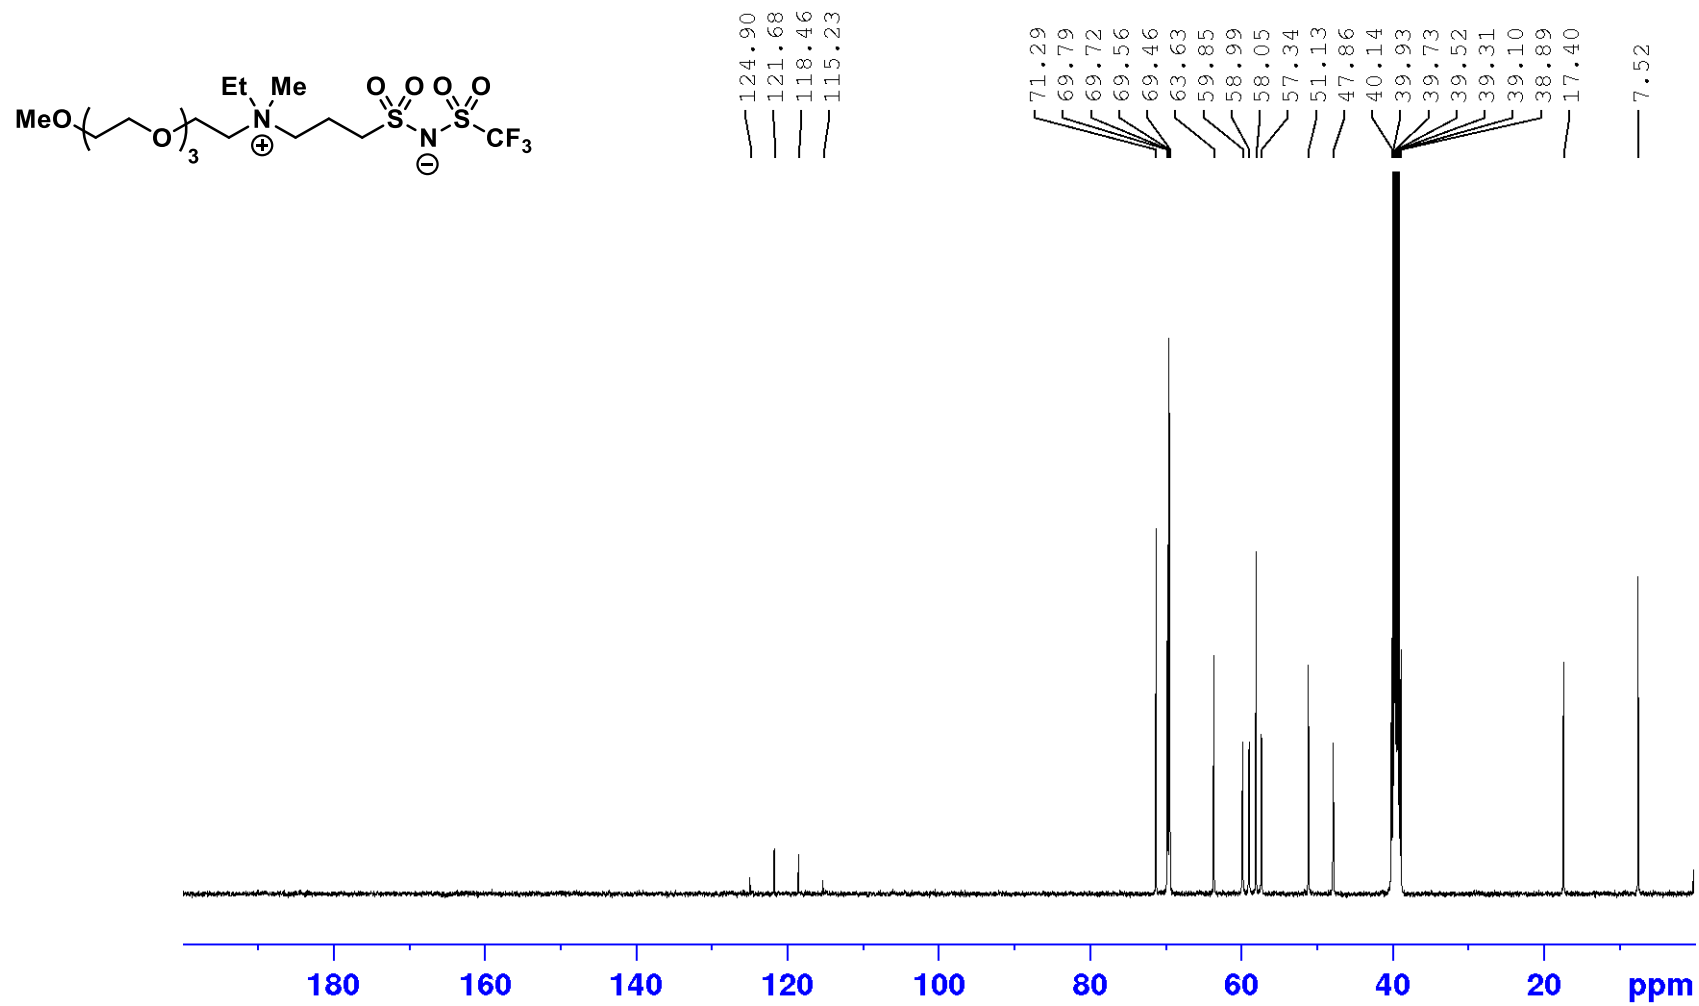

# Mass spectrum of ZIL 2b

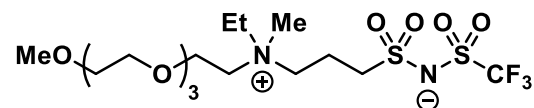

Spectrum

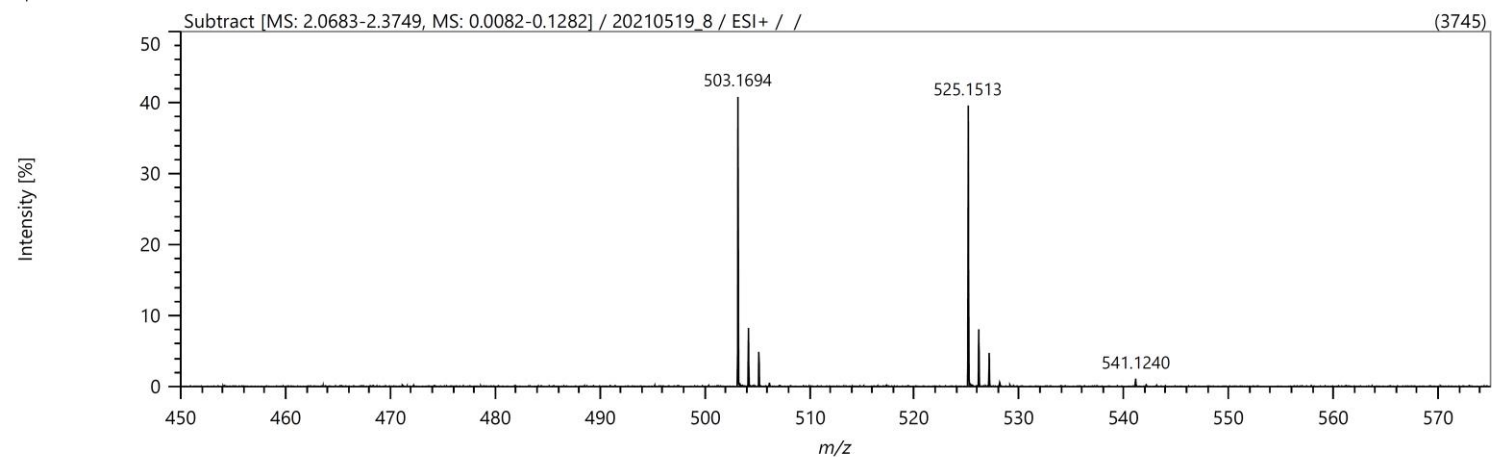

## Elemental Composition

### Parameters

Tolerance:  $\pm 2.00$  ppm  
 Electron: Odd/Even  
 Charge: +1  
 DBE: -99.0 - 999.0

### Elements Set 1:

| Symbol | C   | H    | F | N | O | S | Na |
|--------|-----|------|---|---|---|---|----|
| Min    | 0   | 0    | 3 | 2 | 8 | 2 | 0  |
| Max    | 400 | 1000 | 3 | 2 | 8 | 2 | 1  |

## Results

| Mass      | Formula                                                                                        | Calculated Mass | Mass Difference [mDa] | Mass Difference [ppm] | DBE  |
|-----------|------------------------------------------------------------------------------------------------|-----------------|-----------------------|-----------------------|------|
| 503.16939 | C <sub>16</sub> H <sub>34</sub> N <sub>2</sub> O <sub>8</sub> F <sub>3</sub> S <sub>2</sub>    | 503.17032       | -0.92                 | -1.84                 | -0.5 |
| 525.15129 | C <sub>16</sub> H <sub>33</sub> N <sub>2</sub> O <sub>8</sub> F <sub>3</sub> Na S <sub>2</sub> | 525.15226       | -0.98                 | -1.86                 | -0.5 |

$^1\text{H}$  NMR spectrum of ZIL 2c

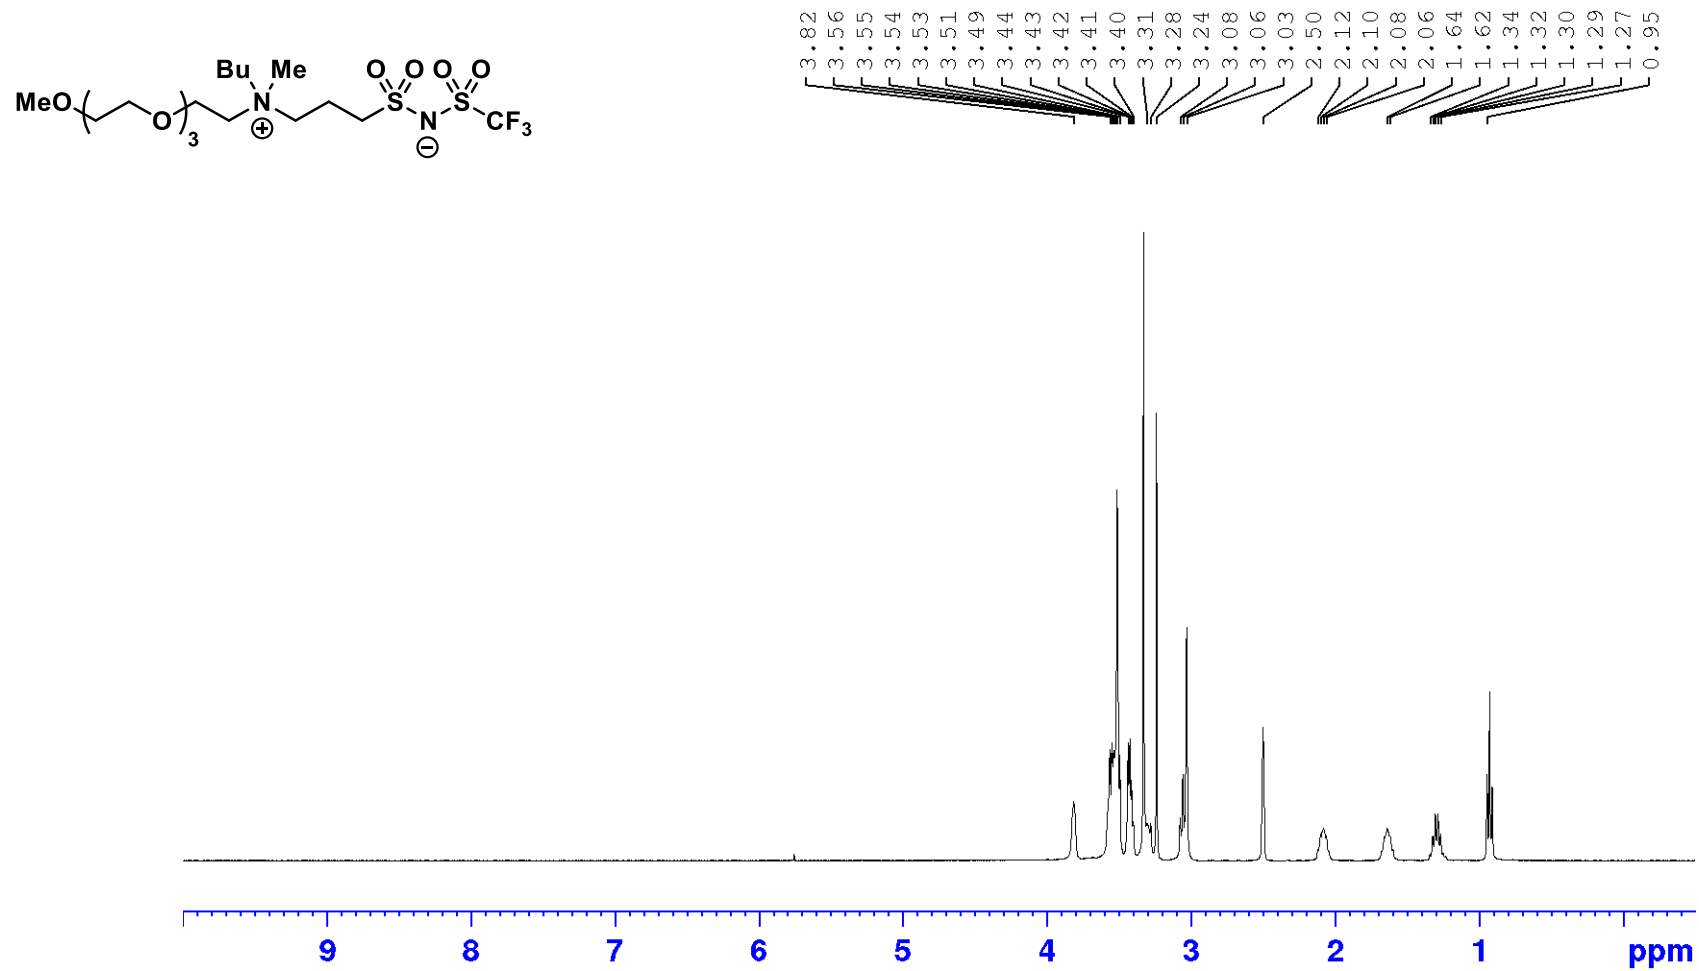

$^{19}\text{F}$  NMR spectrum of ZIL 2c

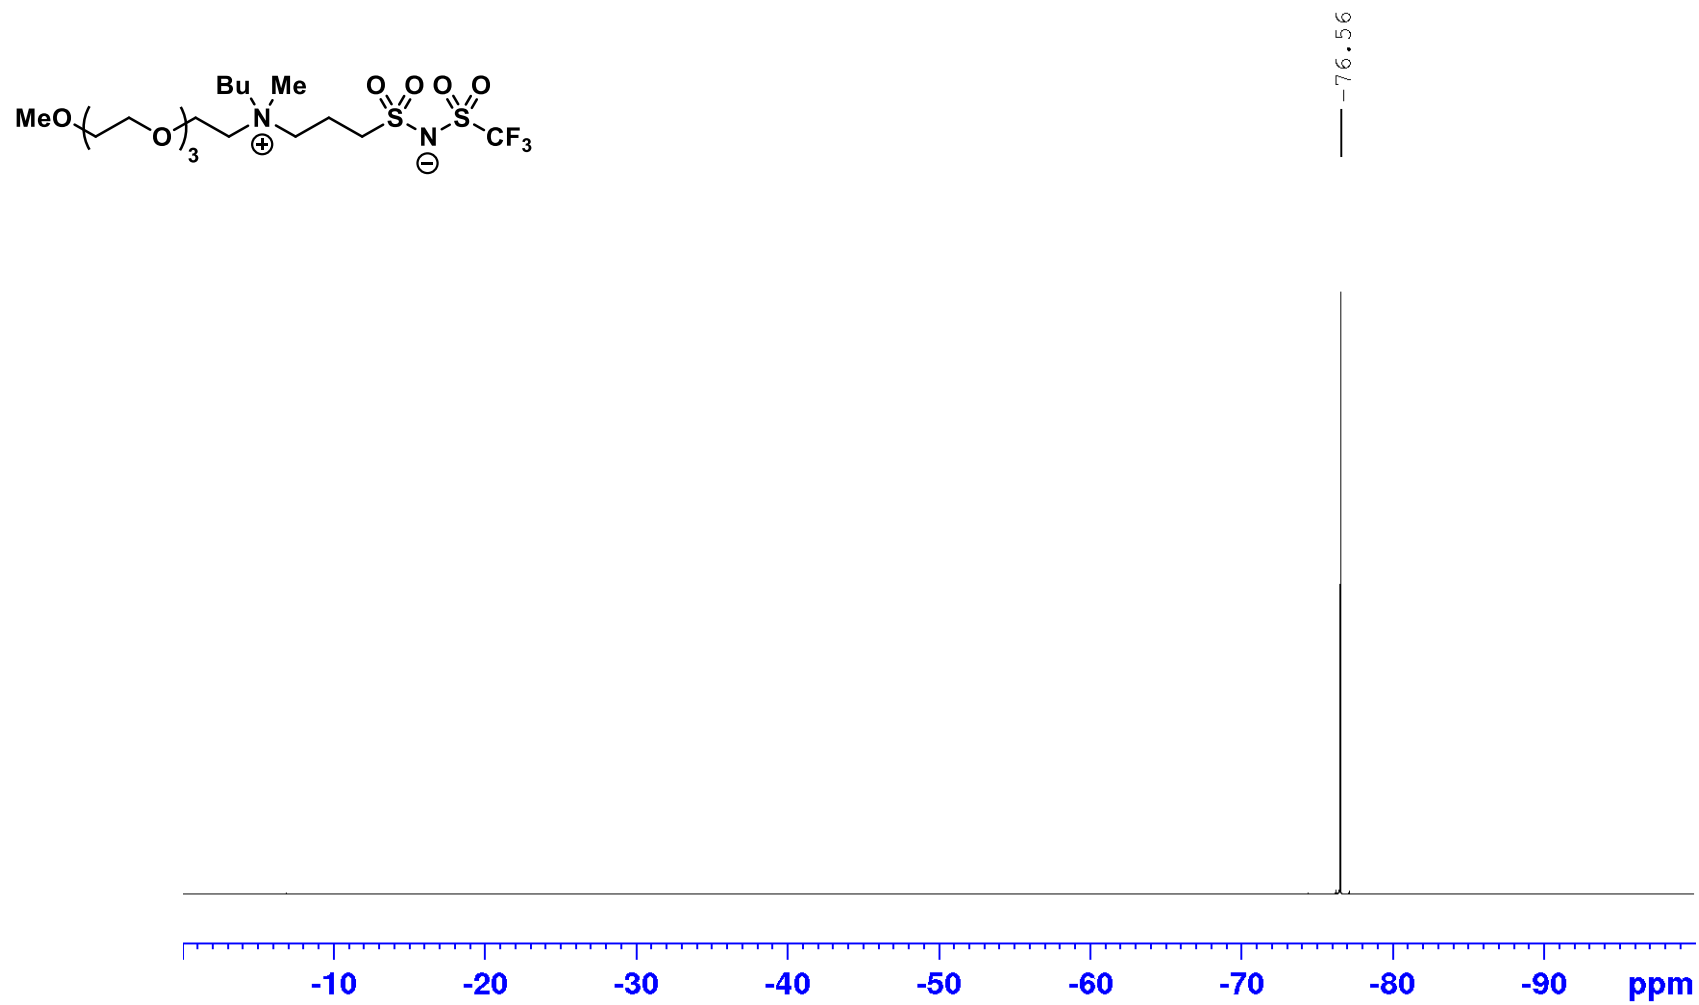

$^{13}\text{C}$  NMR spectrum of ZIL 2c

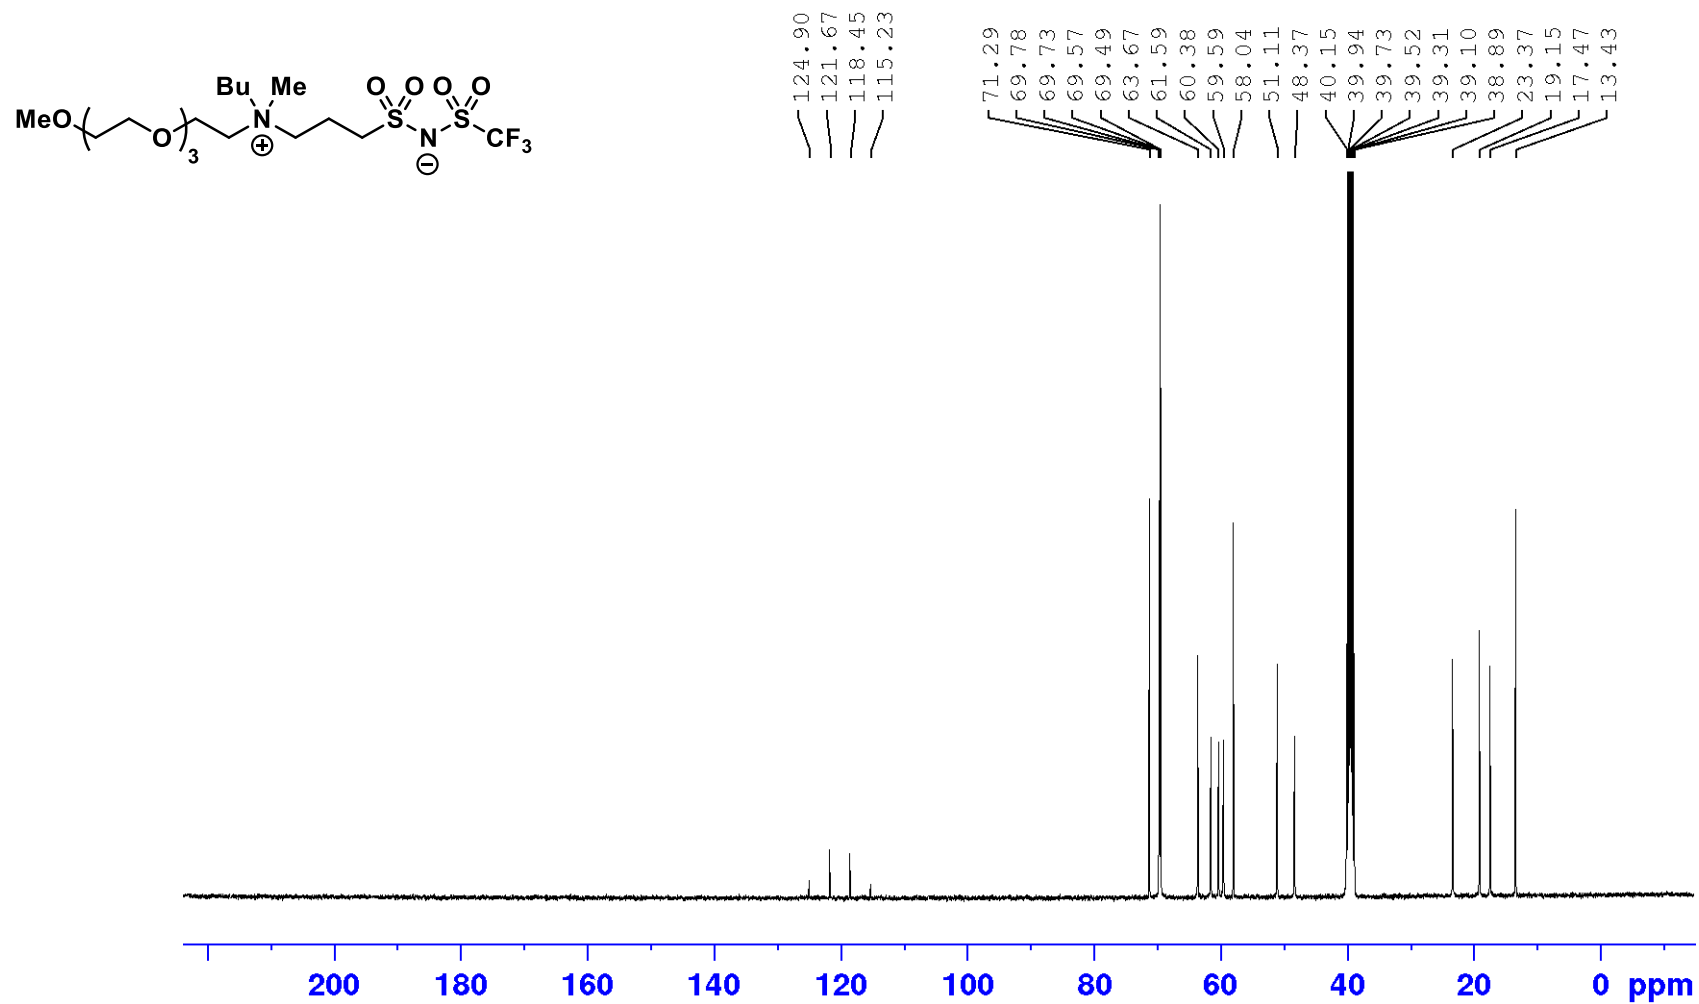

# Mass spectrum of ZIL 2c

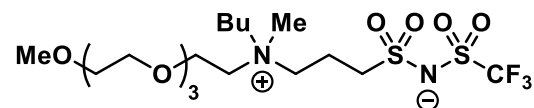

Spectrum

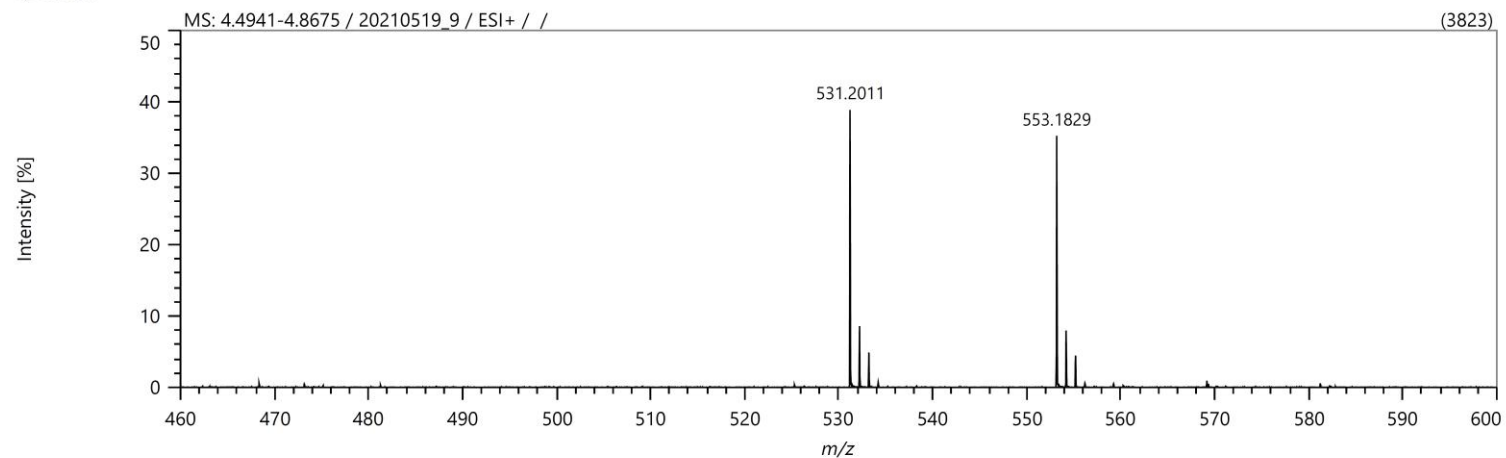

## Elemental Composition

### Parameters

Tolerance:  $\pm 2.00$  ppm  
 Electron: Odd/Even  
 Charge: +1  
 DBE: -99.0 - 999.0

### Elements Set 1:

| Symbol | C   | H    | F | N | O | S | Na |
|--------|-----|------|---|---|---|---|----|
| Min    | 0   | 0    | 3 | 2 | 8 | 2 | 0  |
| Max    | 400 | 1000 | 3 | 2 | 8 | 2 | 1  |

## Results

| Mass      | Formula                                                                                       | Calculated Mass | Mass Difference [mDa] | Mass Difference [ppm] | DBE  |
|-----------|-----------------------------------------------------------------------------------------------|-----------------|-----------------------|-----------------------|------|
| 531.20105 | C <sub>18</sub> H <sub>38</sub> N <sub>2</sub> O <sub>8</sub> F <sub>3</sub> S <sub>2</sub>   | 531.20162       | -0.57                 | -1.07                 | -0.5 |
| 553.18286 | C <sub>18</sub> H <sub>37</sub> N <sub>2</sub> O <sub>8</sub> F <sub>3</sub> NaS <sub>2</sub> | 553.18356       | -0.70                 | -1.27                 | -0.5 |

$^1\text{H}$  NMR spectrum of ZIL 2d

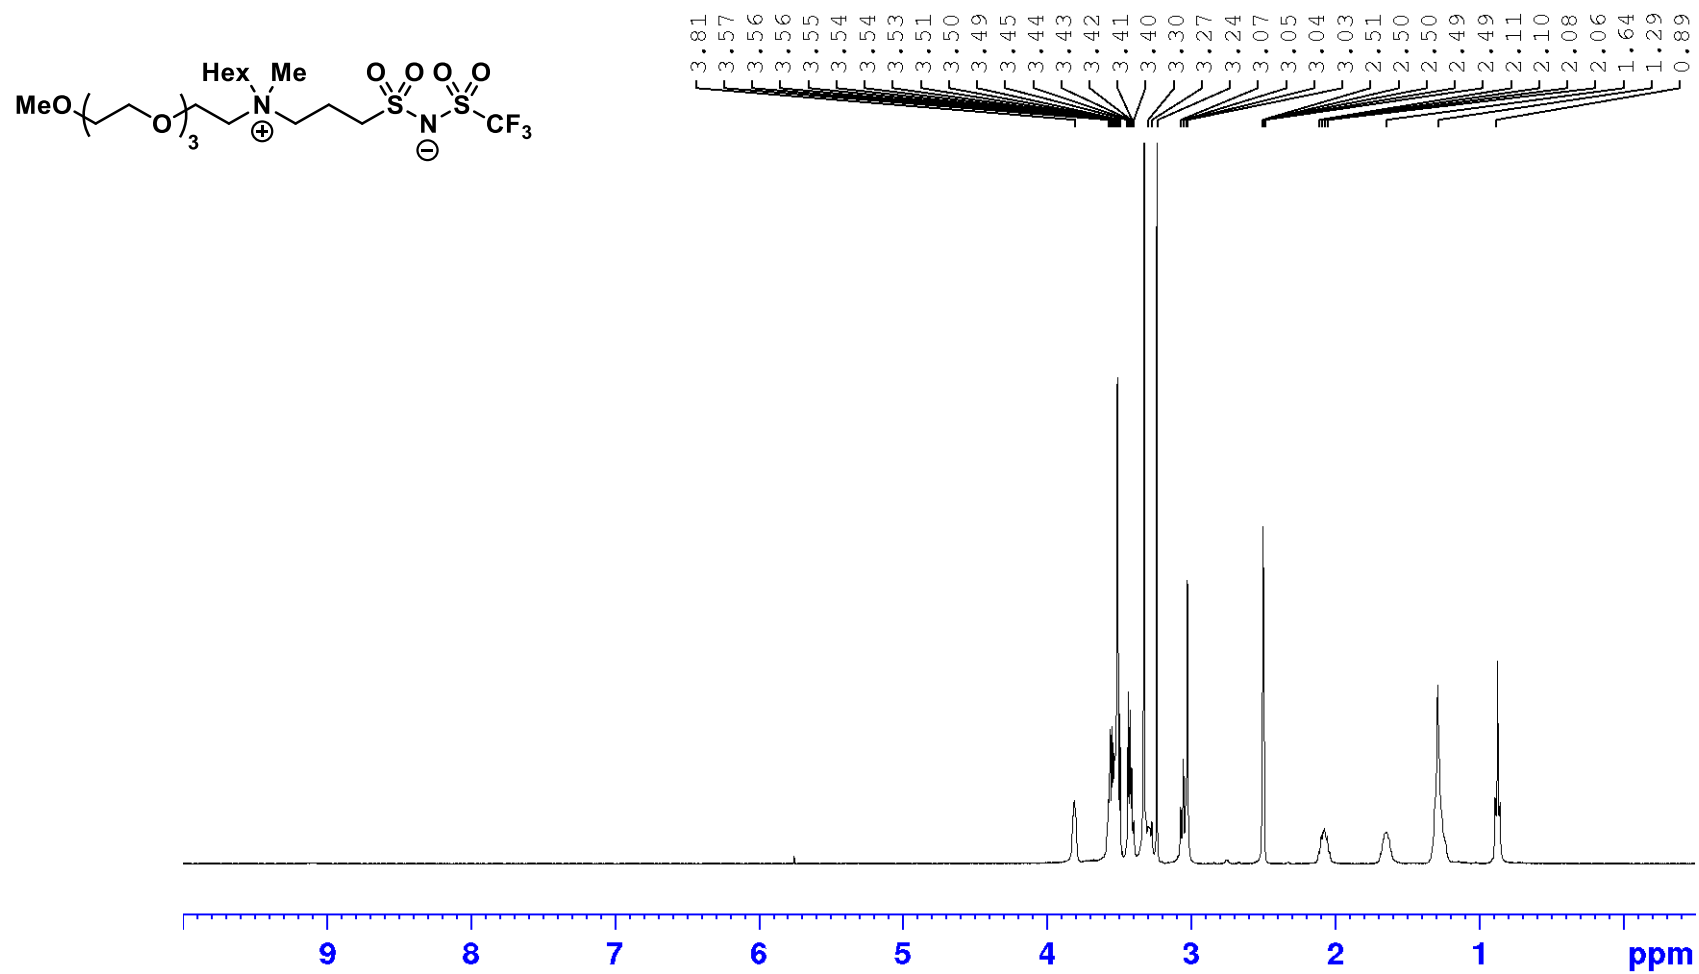

$^{19}\text{F}$  NMR spectrum of ZIL 2d

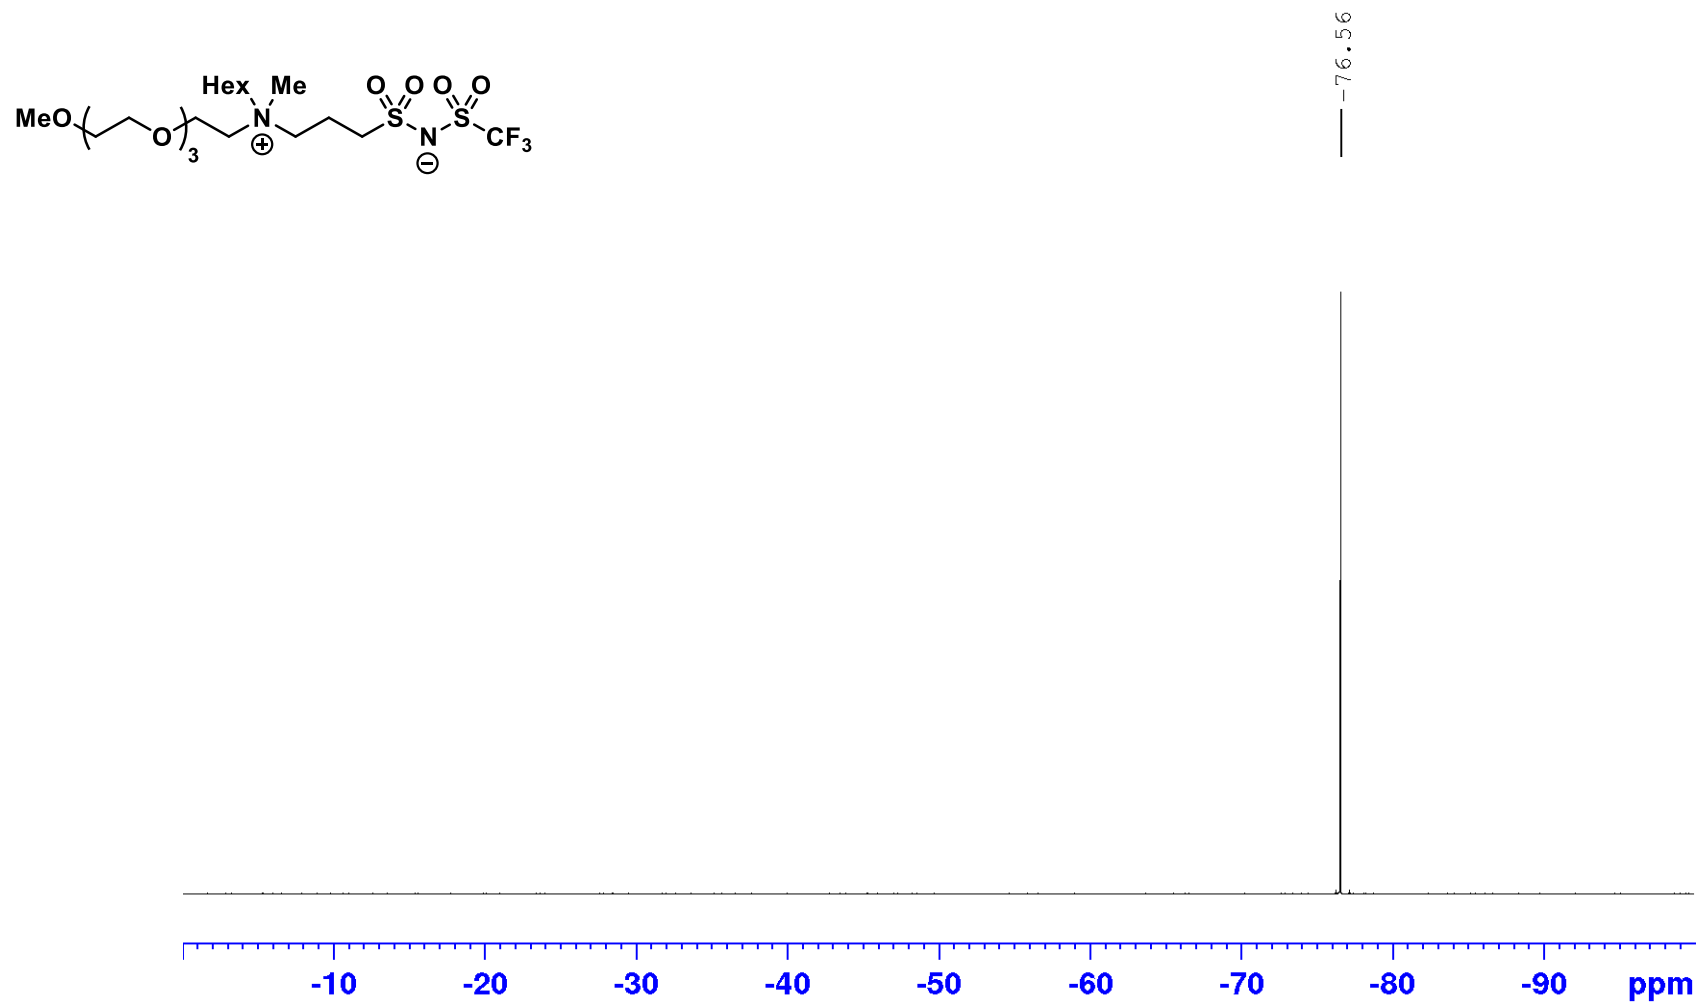



$^{13}\text{C}$  NMR spectrum of ZIL 2d

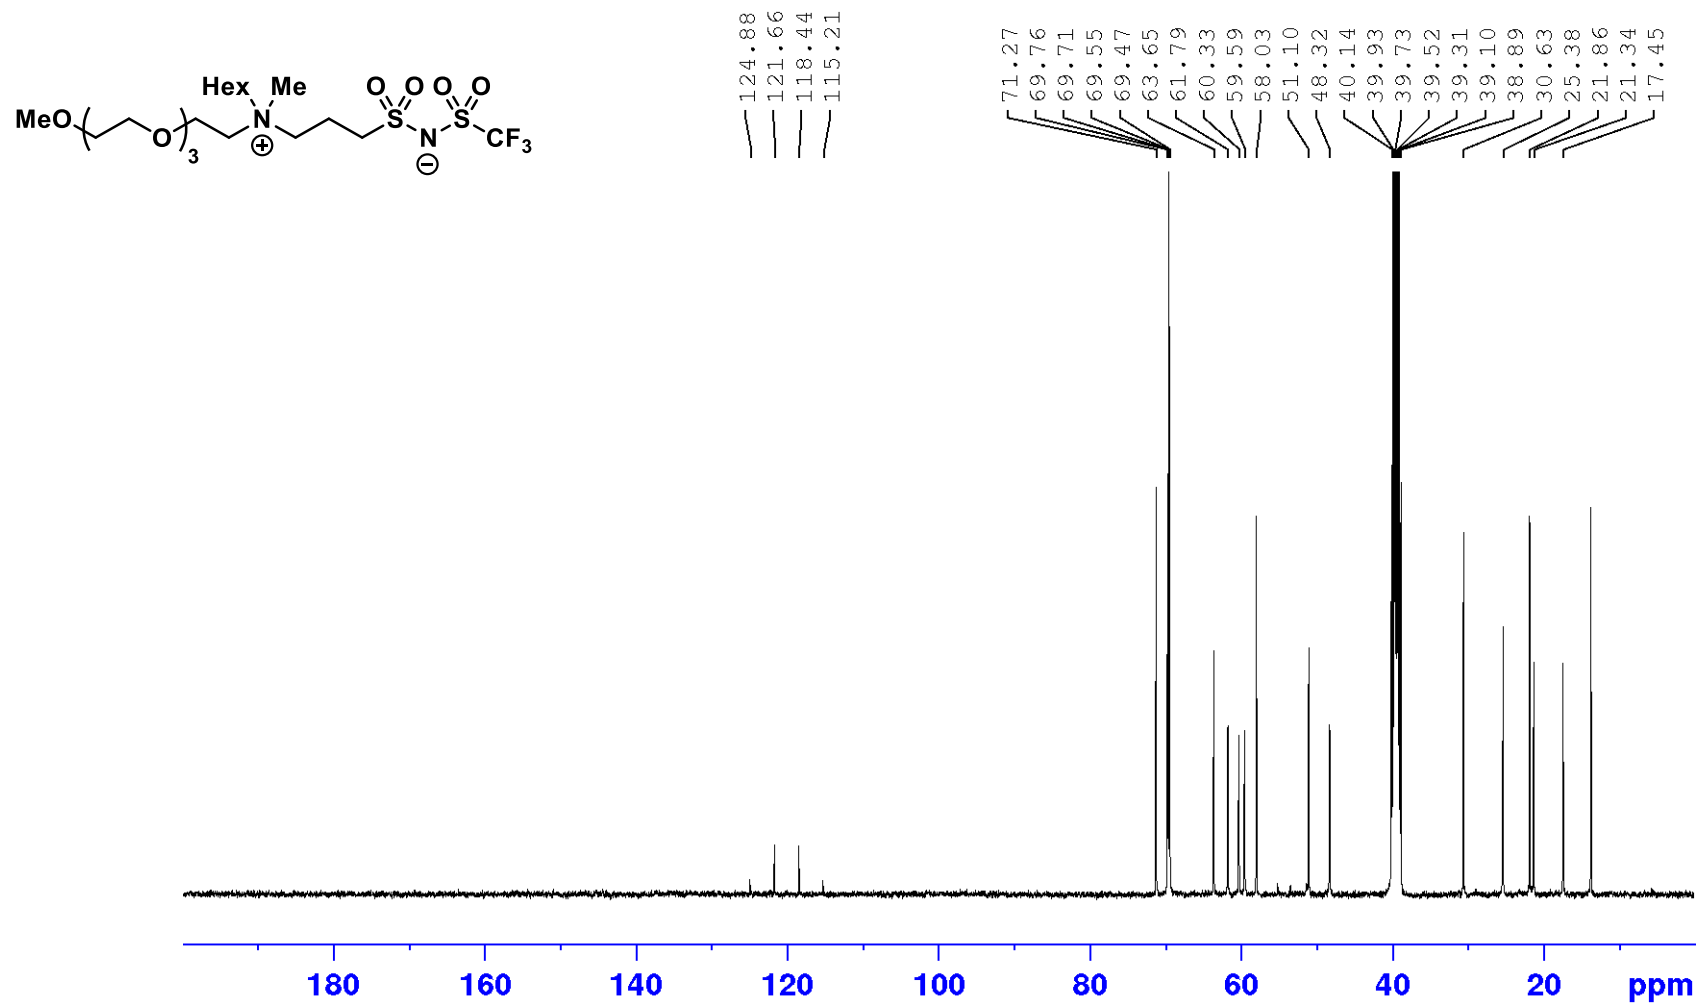

Mass spectrum of ZIL 2d

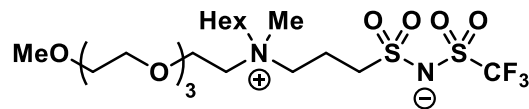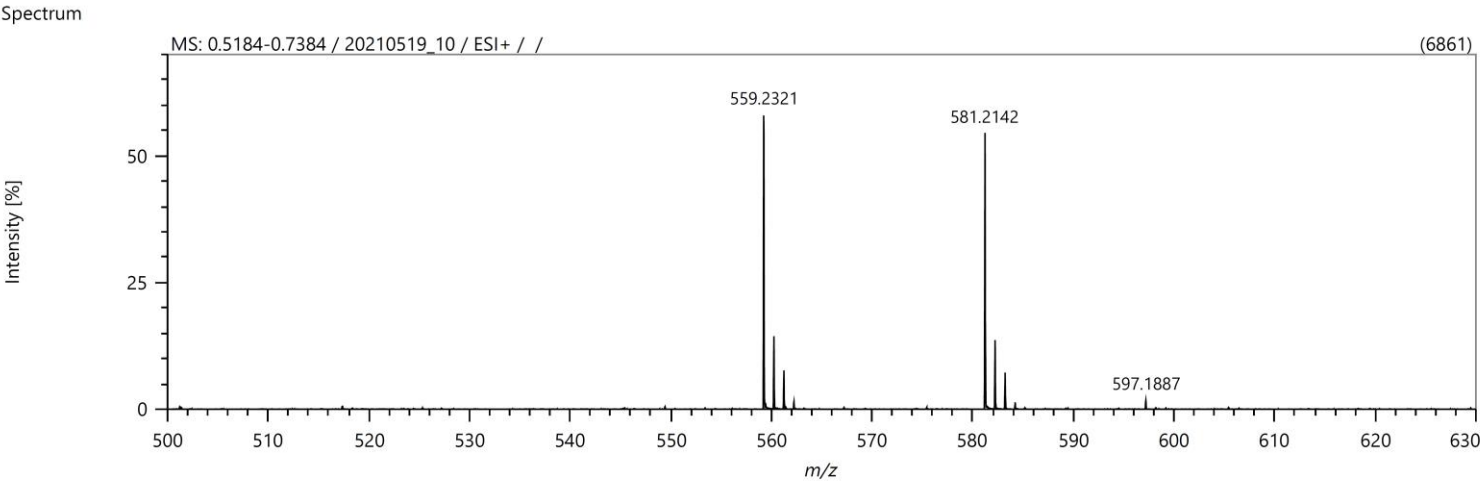

| Elemental Composition |               | Elements Set 1: |     |      |   |   |   |   |    |
|-----------------------|---------------|-----------------|-----|------|---|---|---|---|----|
| Parameters            |               | Symbol          | C   | H    | F | N | O | S | Na |
| Tolerance:            | ±2.00 ppm     | Min             | 0   | 0    | 3 | 2 | 8 | 2 | 0  |
| Electron:             | Odd/Even      | Max             | 400 | 1000 | 3 | 2 | 8 | 2 | 1  |
| Charge:               | +1            |                 |     |      |   |   |   |   |    |
| DBE:                  | -99.0 - 999.0 |                 |     |      |   |   |   |   |    |

| Mass      | Formula                | Calculated Mass | Mass Difference [mDa] | Mass Difference [ppm] | DBE  |
|-----------|------------------------|-----------------|-----------------------|-----------------------|------|
| 559.23205 | C20 H42 N2 O8 F3 S2    | 559.23292       | -0.87                 | -1.55                 | -0.5 |
| 581.21418 | C20 H41 N2 O8 F3 Na S2 | 581.21486       | -0.69                 | -1.18                 | -0.5 |

$^1\text{H}$  NMR spectrum of ZIL 2e

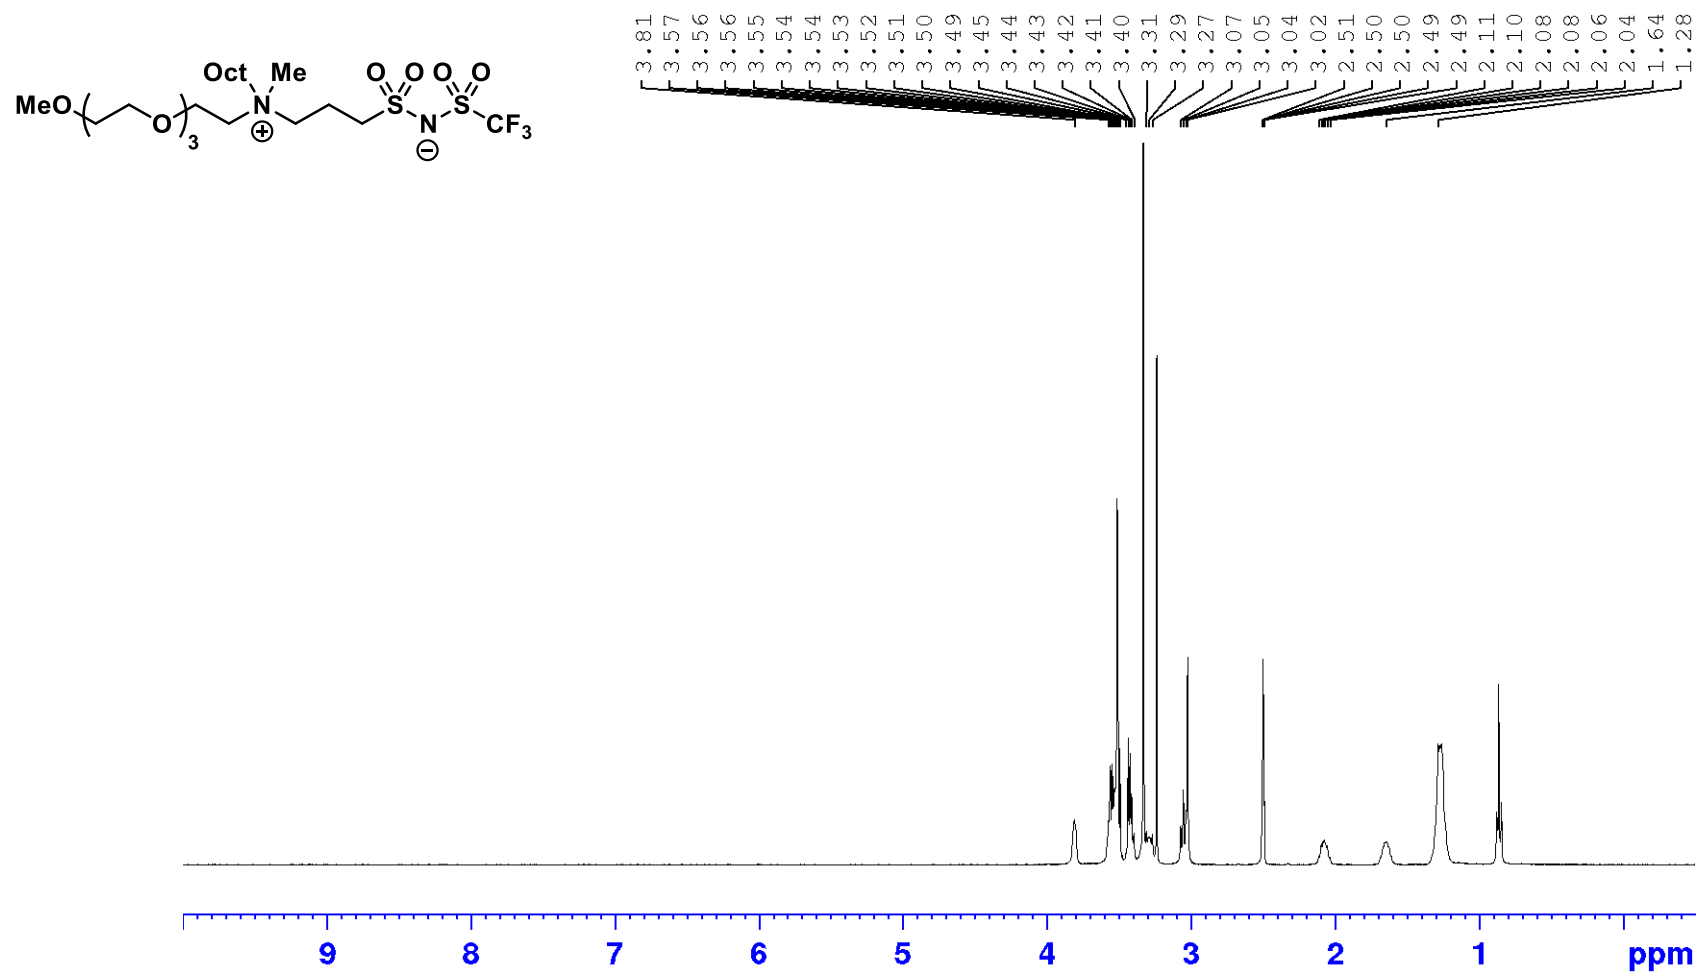

$^{19}\text{F}$  NMR spectrum of ZIL 2e

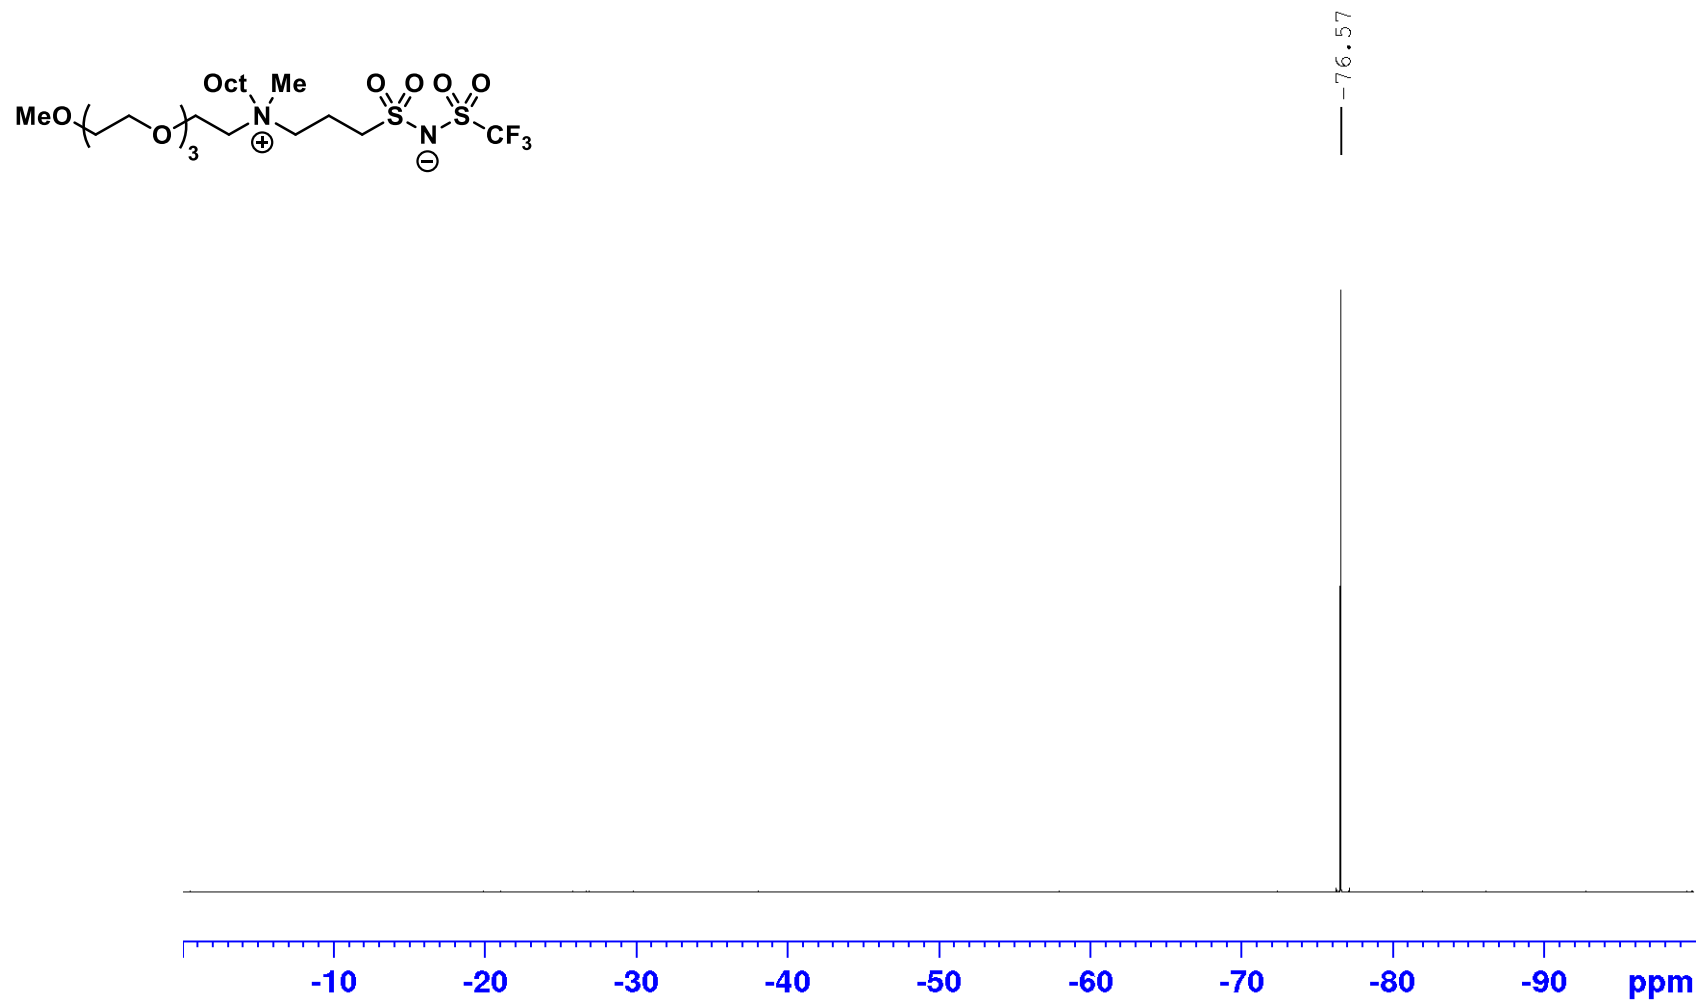

$^{13}\text{C}$  NMR spectrum of ZIL 2e

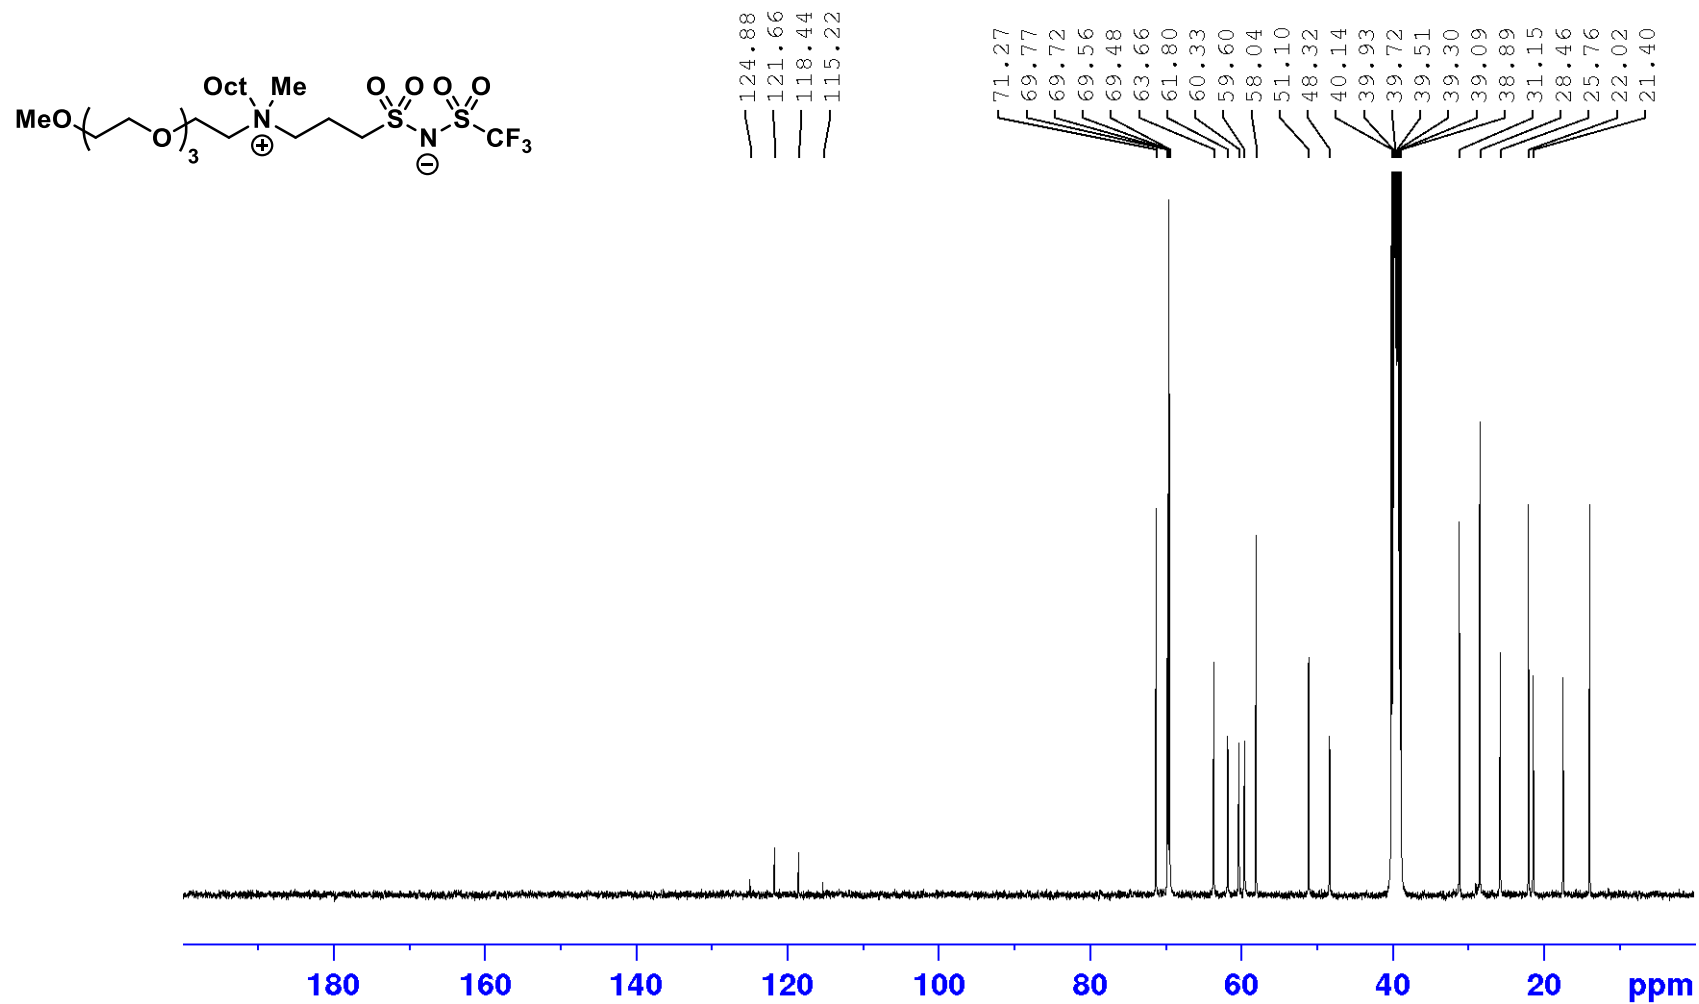

# Mass spectrum of ZIL 2e

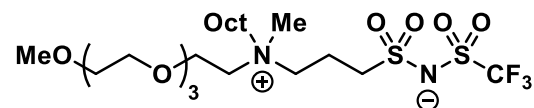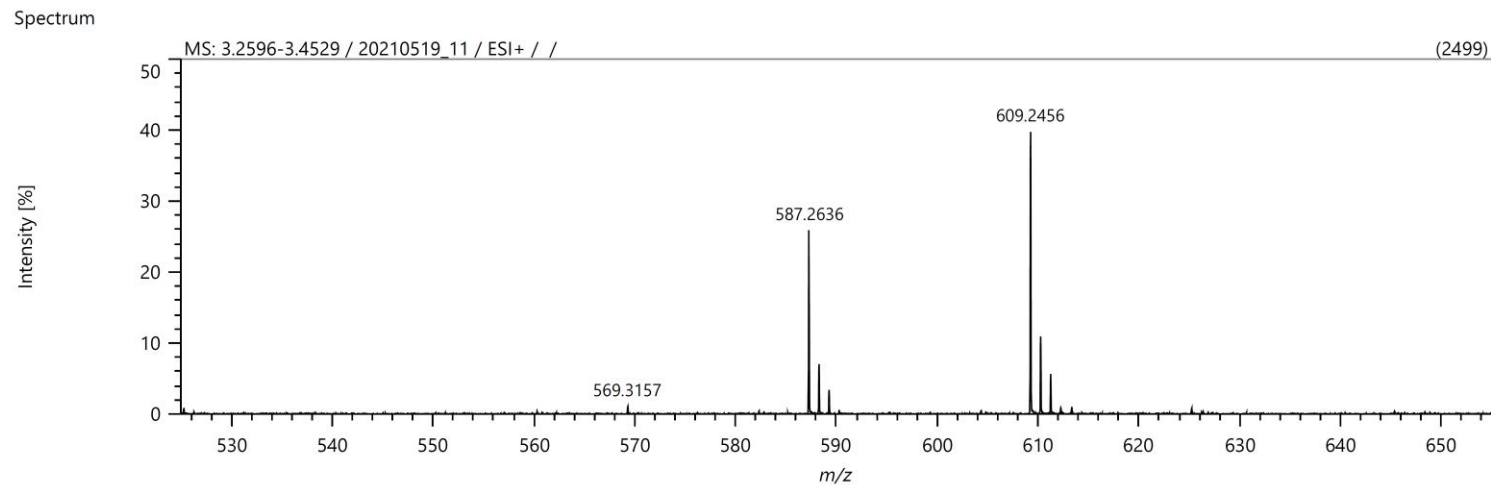

## Elemental Composition

### Parameters

Tolerance:  $\pm 2.00$  ppm  
 Electron: Odd/Even  
 Charge: +1  
 DBE: -99.0 - 999.0

### Elements Set 1:

| Symbol | C   | H    | F | N | O | S | Na |
|--------|-----|------|---|---|---|---|----|
| Min    | 0   | 0    | 3 | 2 | 8 | 2 | 0  |
| Max    | 400 | 1000 | 3 | 2 | 8 | 2 | 1  |

## Results

| Mass      | Formula                                                                                        | Calculated Mass | Mass Difference [mDa] | Mass Difference [ppm] | DBE  |
|-----------|------------------------------------------------------------------------------------------------|-----------------|-----------------------|-----------------------|------|
| 587.26365 | C <sub>22</sub> H <sub>46</sub> N <sub>2</sub> O <sub>8</sub> F <sub>3</sub> S <sub>2</sub>    | 587.26422       | -0.57                 | -0.97                 | -0.5 |
| 609.24563 | C <sub>22</sub> H <sub>45</sub> N <sub>2</sub> O <sub>8</sub> F <sub>3</sub> Na S <sub>2</sub> | 609.24616       | -0.53                 | -0.87                 | -0.5 |

$^1\text{H}$  NMR spectrum of ZIL 3c

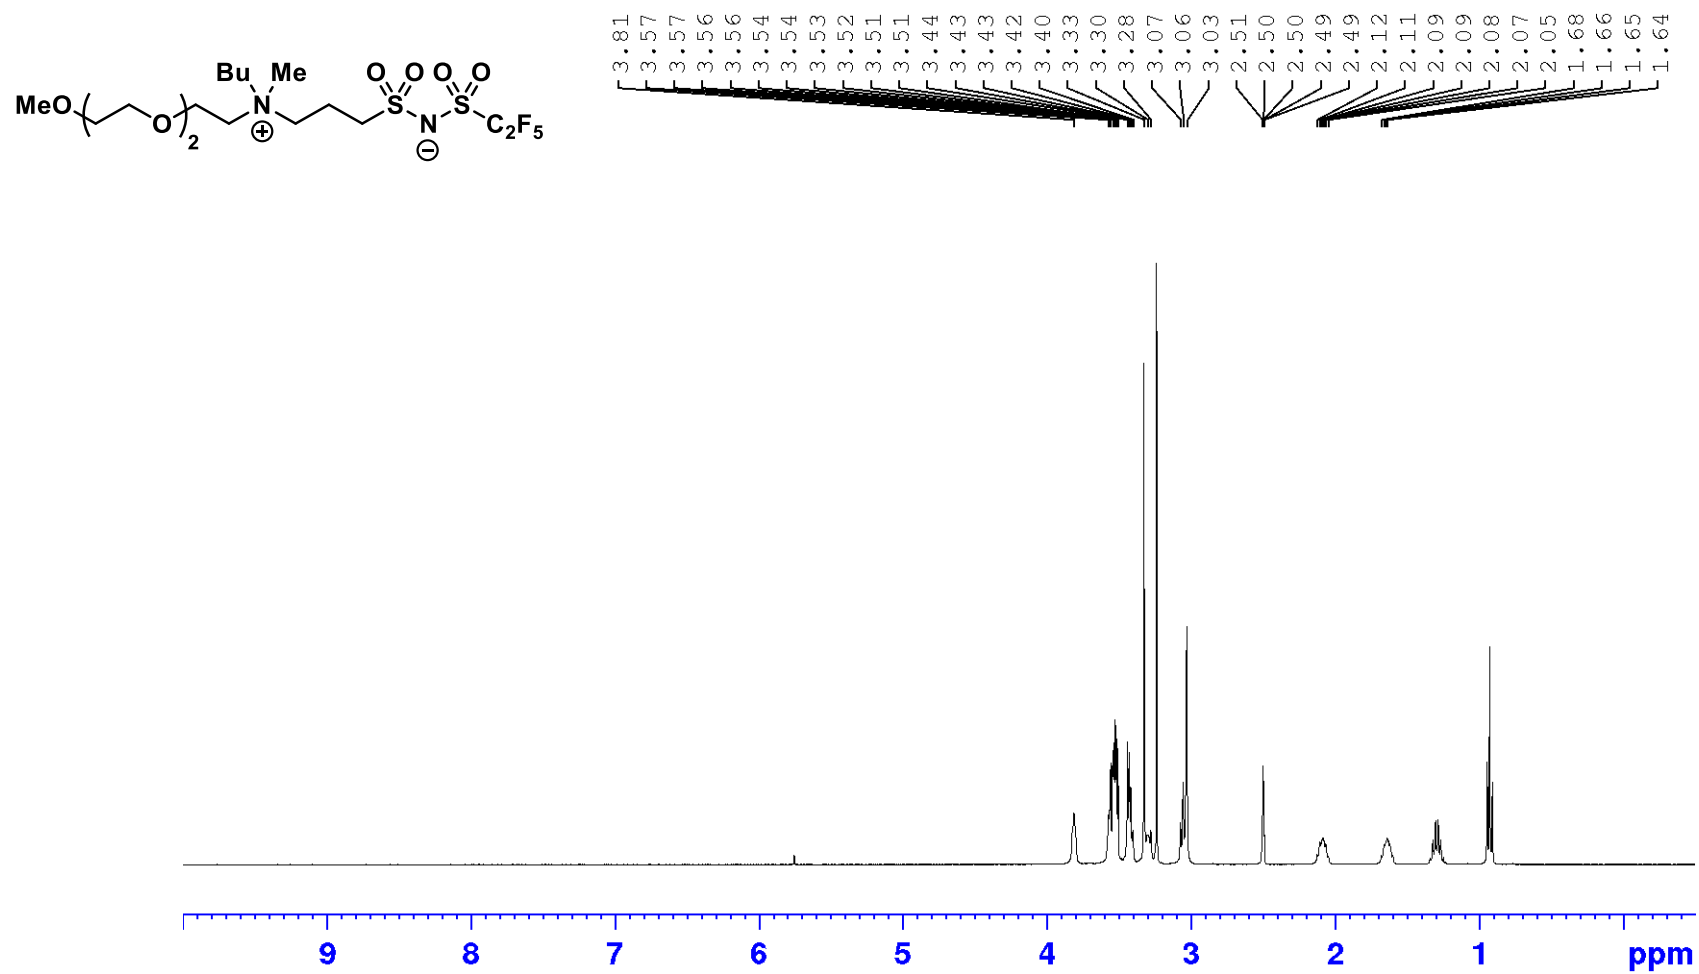

$^{19}\text{F}$  NMR spectrum of ZIL 3c

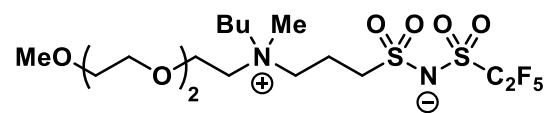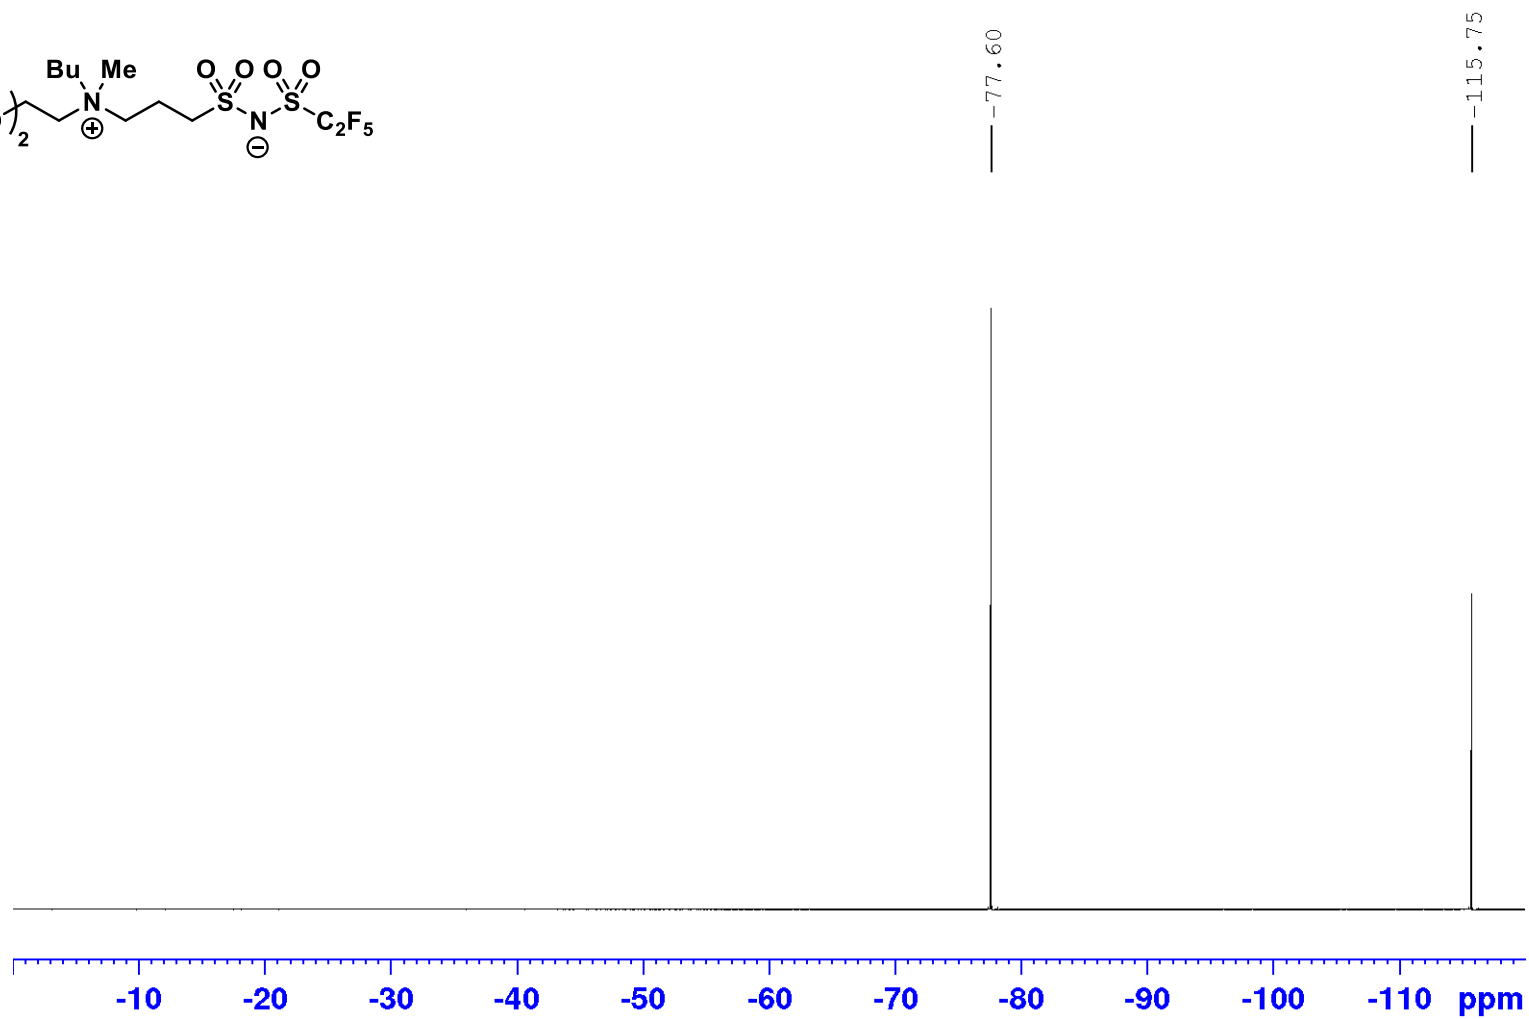



$^{13}\text{C}$  NMR spectrum of ZIL 3c

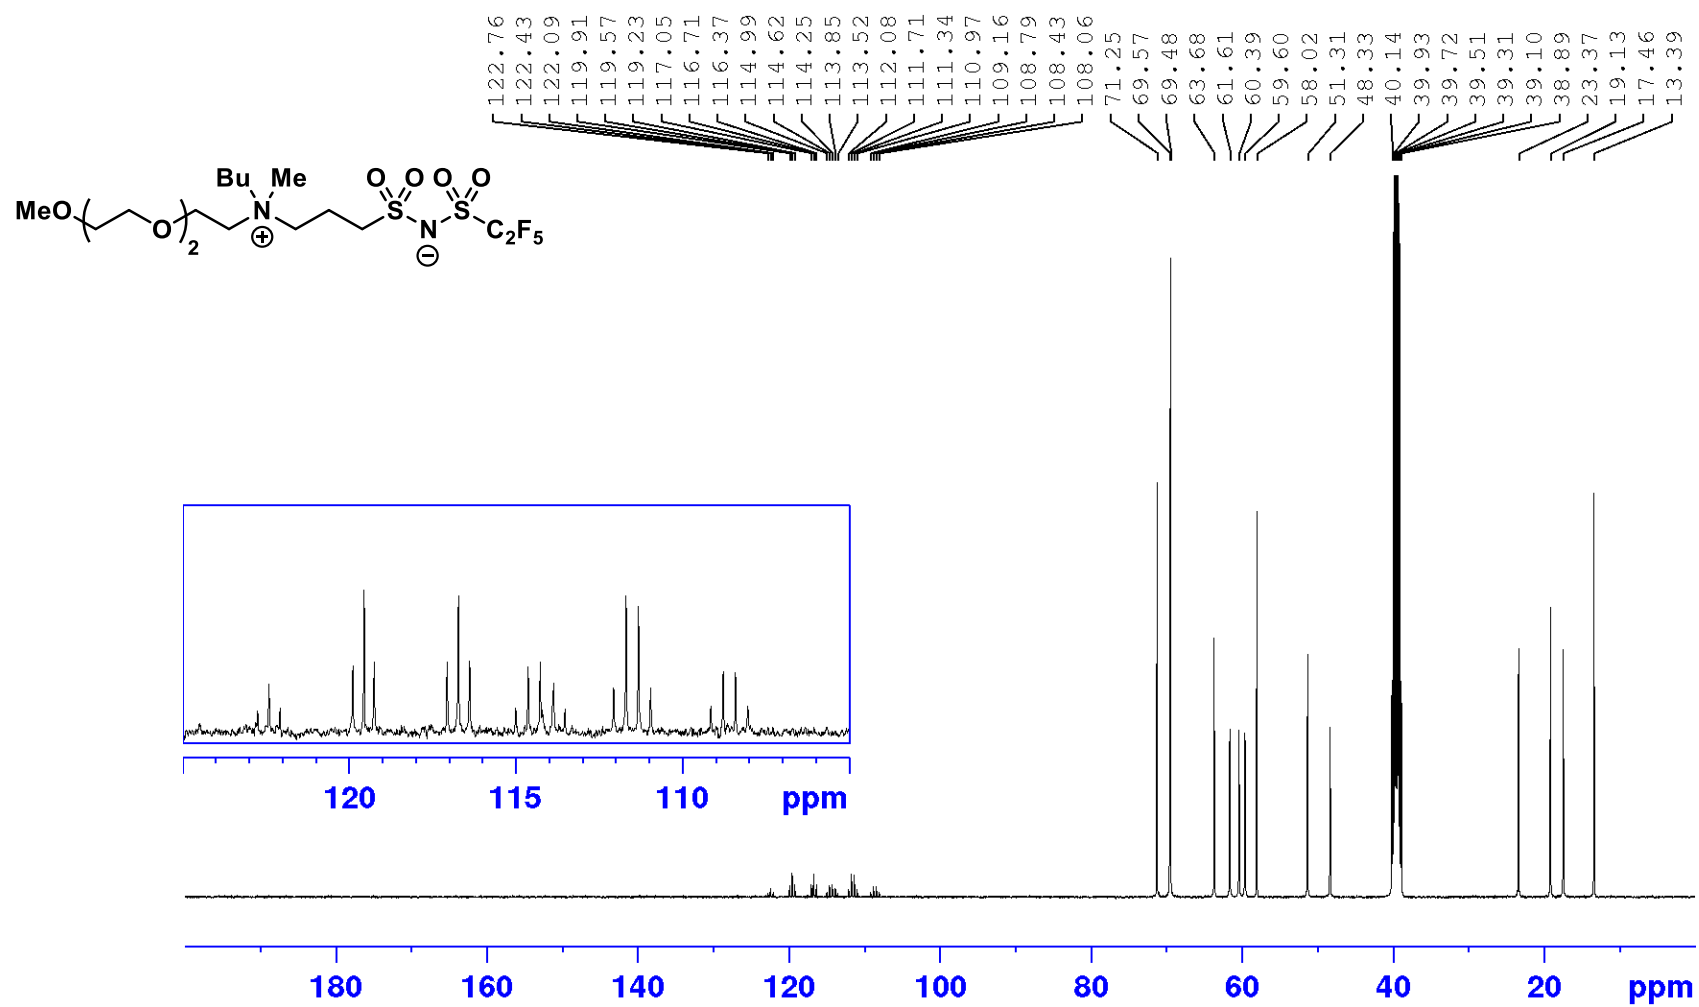

# Mass spectrum of ZIL 3c

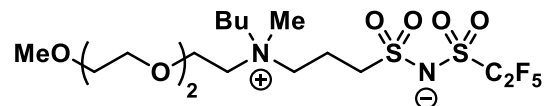

Spectrum

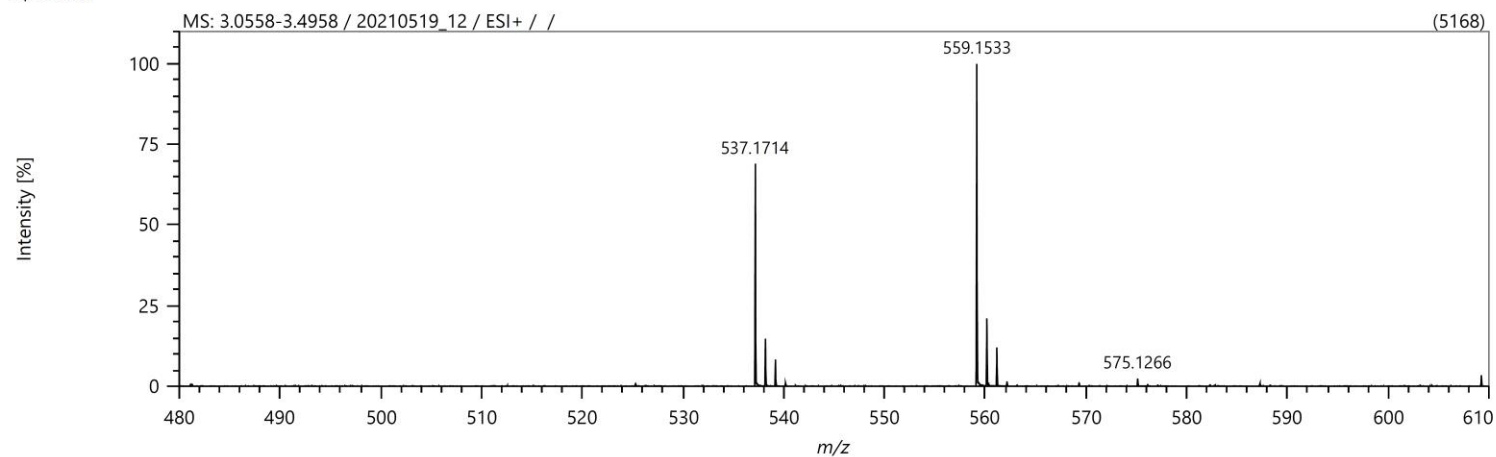

## Elemental Composition

### Parameters

Tolerance:  $\pm 2.00$  ppm  
 Electron: Odd/Even  
 Charge: +1  
 DBE: -99.0 - 999.0

### Elements Set 1:

| Symbol | C   | H    | F | N | O | S | Na |
|--------|-----|------|---|---|---|---|----|
| Min    | 0   | 0    | 5 | 2 | 7 | 2 | 0  |
| Max    | 400 | 1000 | 5 | 2 | 8 | 2 | 1  |

## Results

| Mass      | Formula                | Calculated Mass | Mass Difference [mDa] | Mass Difference [ppm] | DBE  |
|-----------|------------------------|-----------------|-----------------------|-----------------------|------|
| 537.17141 | C17 H34 N2 O7 F5 S2    | 537.17221       | -0.80                 | -1.48                 | -0.5 |
| 559.15332 | C17 H33 N2 O7 F5 Na S2 | 559.15415       | -0.84                 | -1.50                 | -0.5 |

$^1\text{H}$  NMR spectrum of ZIL 4c

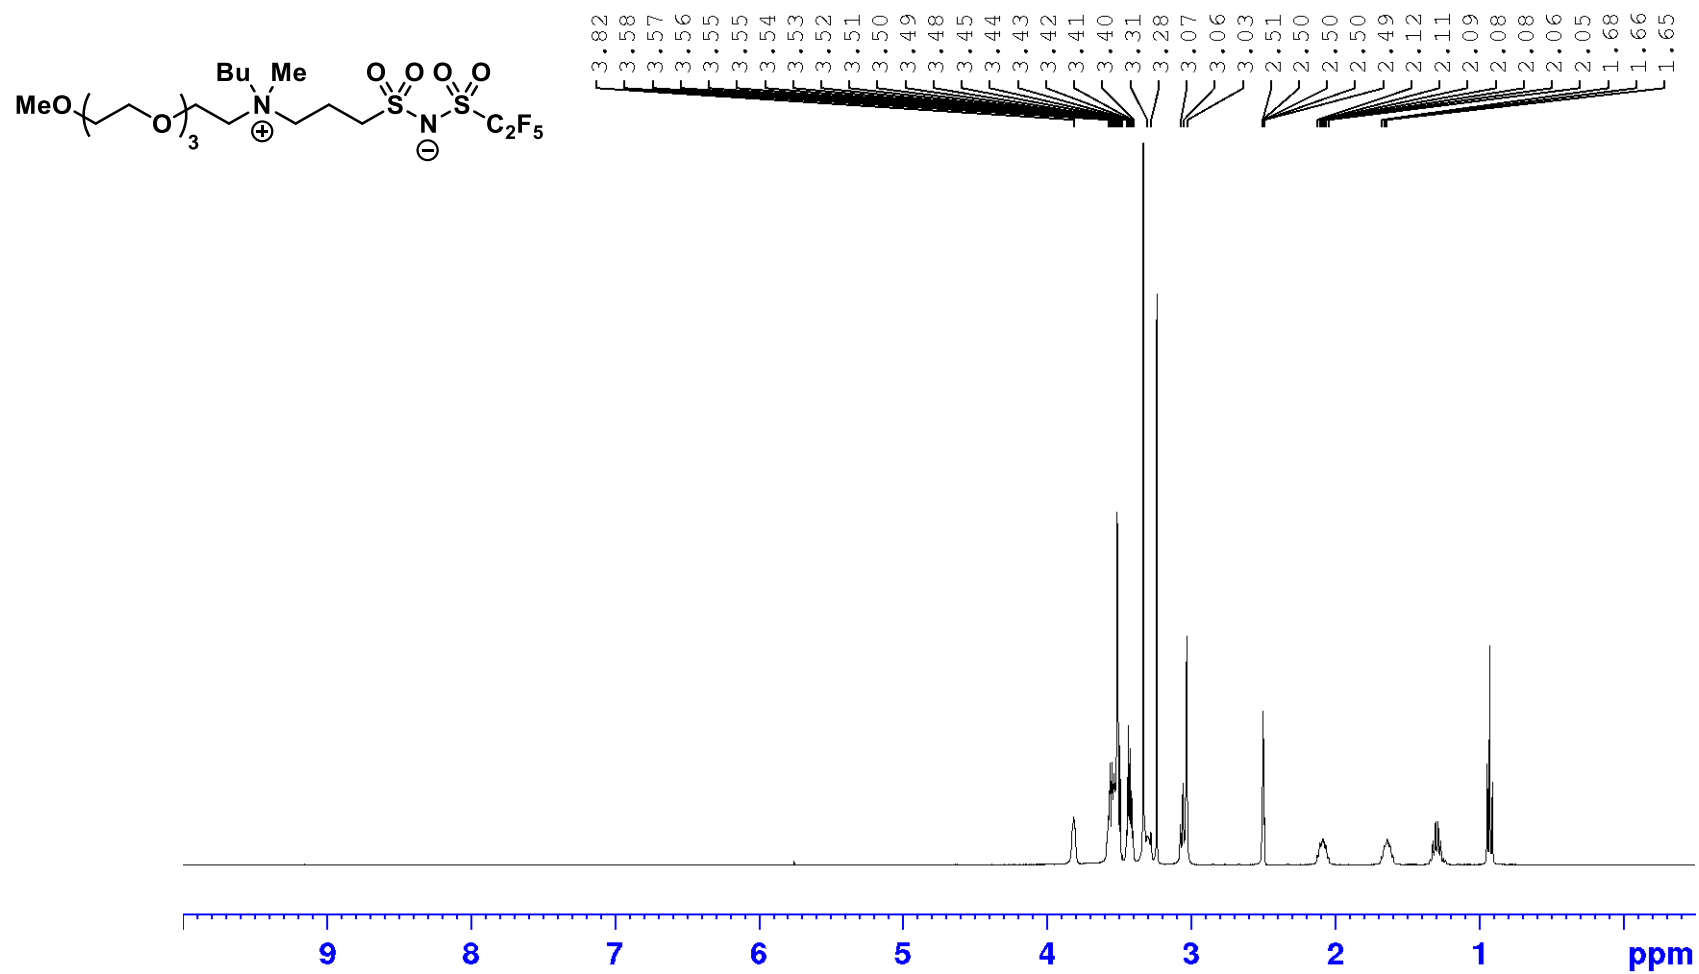

$^{19}\text{F}$  NMR spectrum of ZIL 4c

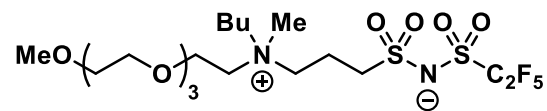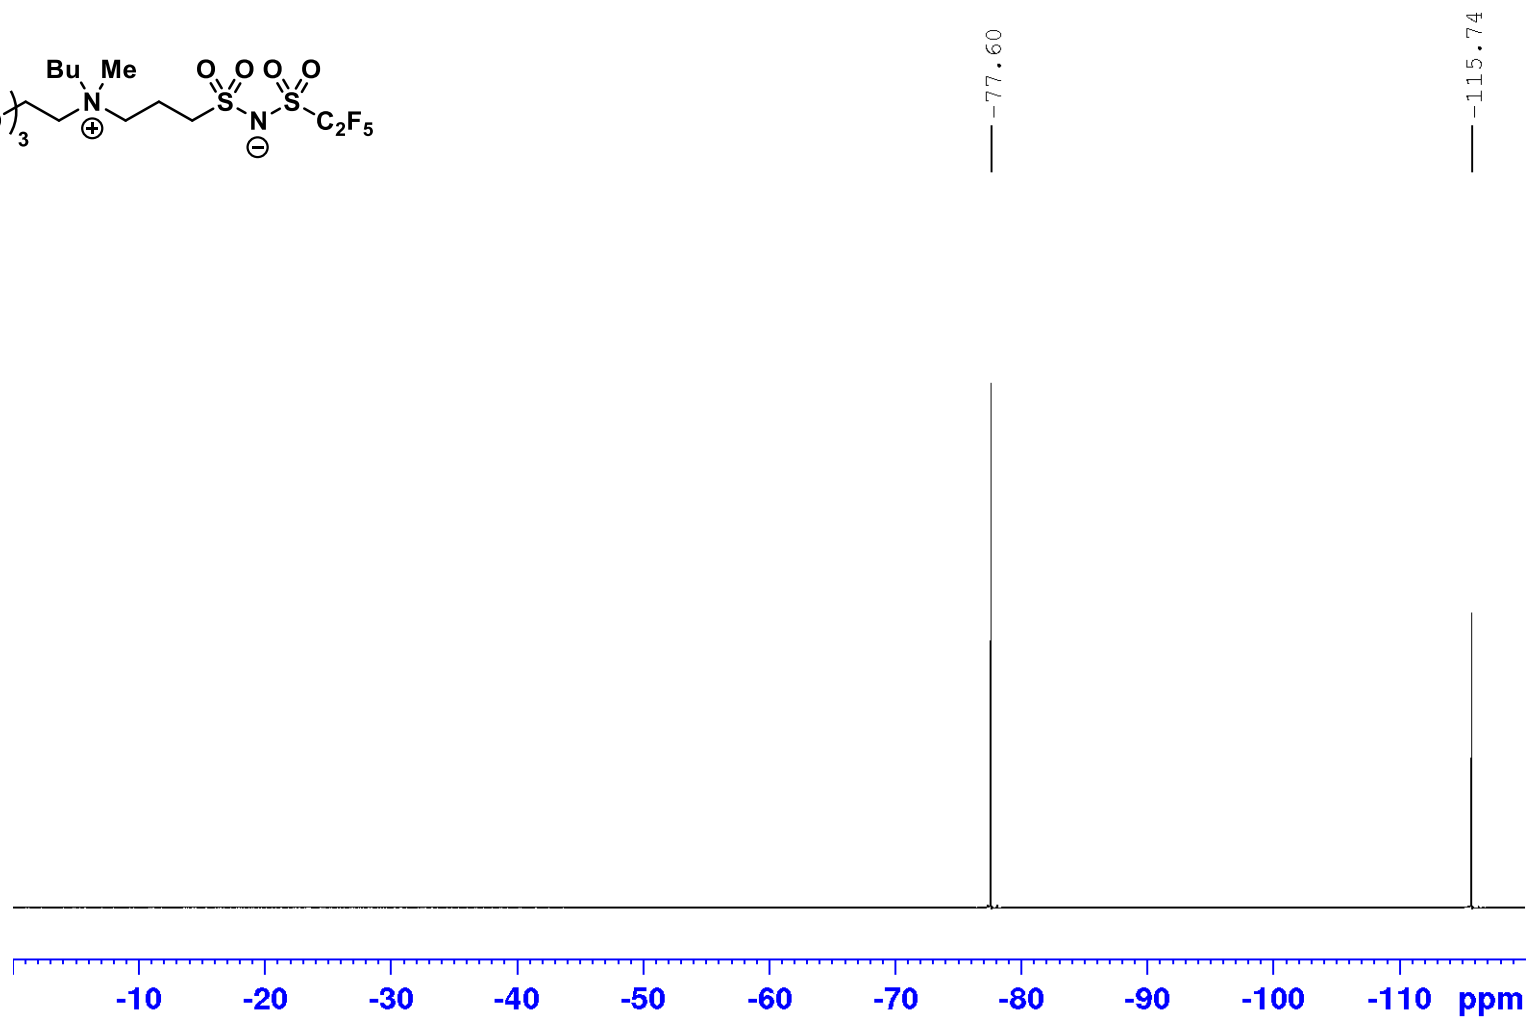

$^{13}\text{C}$  NMR spectrum of ZIL 4c

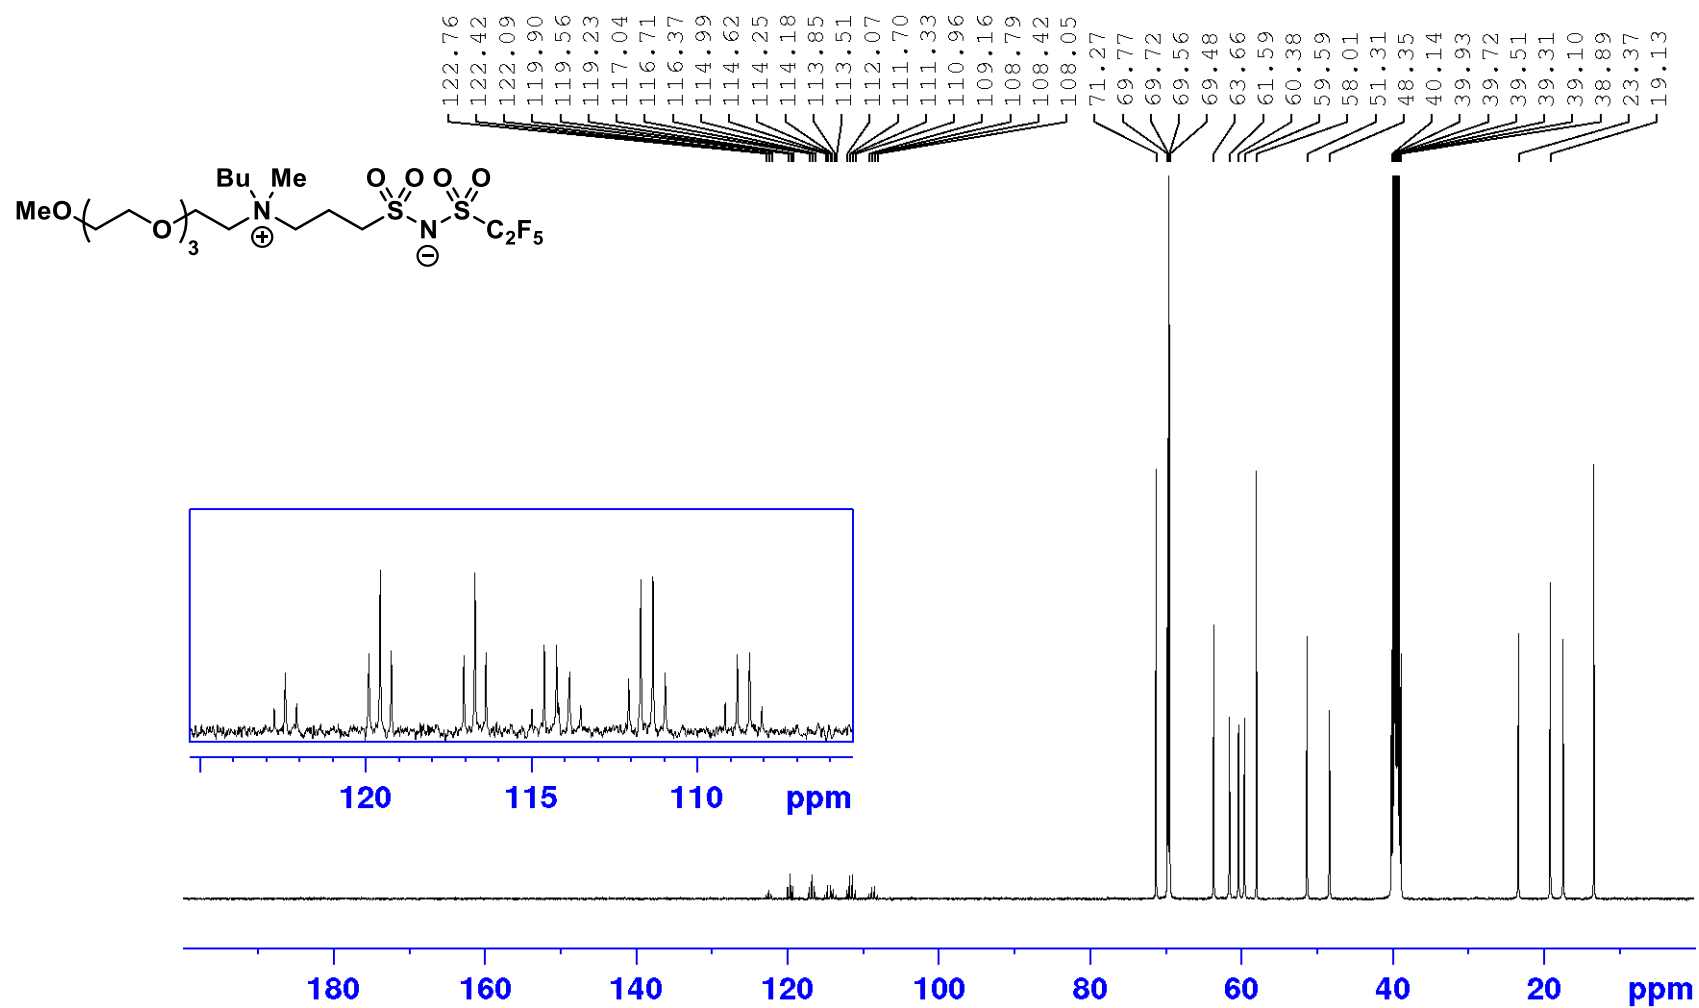

# Mass spectrum of ZIL 4c

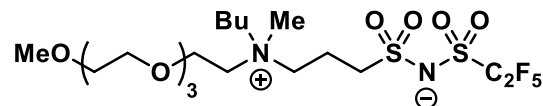

Spectrum

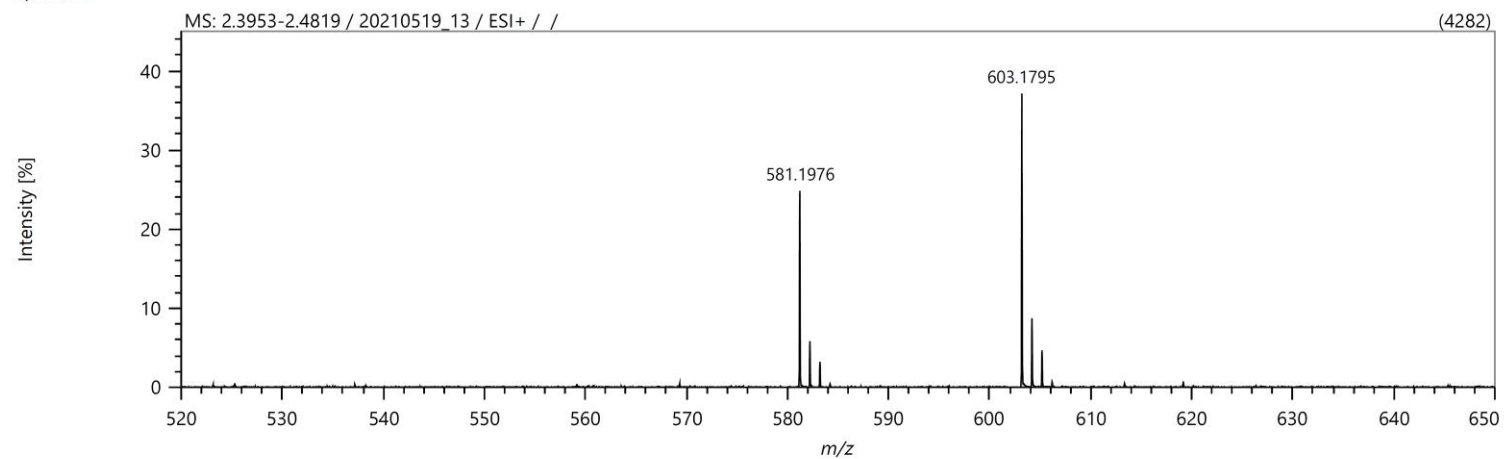

## Elemental Composition

### Parameters

Tolerance:  $\pm 2.00$  ppm  
 Electron: Odd/Even  
 Charge: +1  
 DBE: -99.0 - 999.0

### Elements Set 1:

| Symbol | C   | H    | F | N | O | S | Na |
|--------|-----|------|---|---|---|---|----|
| Min    | 0   | 0    | 5 | 2 | 7 | 2 | 0  |
| Max    | 400 | 1000 | 5 | 2 | 8 | 2 | 1  |

## Results

| Mass      | Formula                                                                                        | Calculated Mass | Mass Difference [mDa] | Mass Difference [ppm] | DBE  |
|-----------|------------------------------------------------------------------------------------------------|-----------------|-----------------------|-----------------------|------|
| 581.19756 | C <sub>19</sub> H <sub>38</sub> N <sub>2</sub> O <sub>8</sub> F <sub>5</sub> S <sub>2</sub>    | 581.19843       | -0.87                 | -1.49                 | -0.5 |
| 603.17952 | C <sub>19</sub> H <sub>37</sub> N <sub>2</sub> O <sub>8</sub> F <sub>5</sub> Na S <sub>2</sub> | 603.18037       | -0.85                 | -1.41                 | -0.5 |
